# Supplementary material for: Network-Level Organization of Systemic Inflammation Reflects Early Alzheimer’s-Like Behavioral Changes
Source: Research Square preprint supplement (doi:10.21203/rs.3.rs-7482654/v1), 2025-10-14
Supplement: Supplementary file 1 [file 2176f6907c6394316e8c6475.xlsx]

## Sheet: Edges by Network
Inflammation Profile Network	Shared name	Node::Source_query term	Node::Target_query term	TgAD Person r	p-value	FDR (q-value)	Δr (Z-observed)	Δr (p-value)	Δr FDR (q-value)	Edge Betweenness	stringdb: :coexpression	stringdb: :cooccurrence	stringdb: :databases	stringdb: :experiments	stringdb: :fusion	stringdb: :neighborhood	stringdb: :score	stringdb: :textmining
1	10116.ENSRNOP00000006246 (pp) 10116.ENSRNOP00000009917	IL10	IFNg	0.97478	3.52e-09	0.000806452	1.72706	0.0420781	0.0151163	2	0.564	0	0	0	0	0	0.981	0.958
1	10116.ENSRNOP00000006246 (pp) 10116.ENSRNOP00000023327	IL10	IL2	0.946475	3.02e-07	0.0016129	-0.205311	0.418665	0.0813953	2.43182	0.061	0	0	0	0	0	0.953	0.952
1	10116.ENSRNOP00000010121 (pp) 10116.ENSRNOP00000072948	IL13	PRLR	0.940857	5.44e-07	0.00241936	2.60691	0.00456814	0.00232558	6.04848	0	0	0.65	0	0	0	0.65	0
1	10116.ENSRNOP00000009917 (pp) 10116.ENSRNOP00000023327	IFNg	IL2	0.938503	6.83e-07	0.00322581	0.884346	0.188255	0.044186	2.43182	0.286	0	0	0	0	0	0.966	0.955
1	10116.ENSRNOP00000010121 (pp) 10116.ENSRNOP00000071252	IL13	IL1a	0.921046	2.95e-06	0.00403226	2.60024	0.00465787	0.00348837	2.76515	0.101	0.491	0	0	0	0	0.932	0.864
1	10116.ENSRNOP00000009448 (pp) 10116.ENSRNOP00000010029	MCP1	IL4	0.917867	3.71e-06	0.00483871	2.33195	0.00985165	0.00581395	2.58333	0.049	0	0	0	0	0	0.852	0.851
1	10116.ENSRNOP00000001110 (pp) 10116.ENSRNOP00000006246	TNFa	IL10	0.916496	4.08e-06	0.00564516	0.671494	0.250953	0.0569767	4.66667	0.214	0	0	0	0	0	0.969	0.962
1	10116.ENSRNOP00000016690 (pp) 10116.ENSRNOP00000071252	CNTF	IL1a	0.915429	4.39e-06	0.00645161	2.03425	0.020963	0.0116279	3.65491	0	0	0	0	0	0	0.414	0.414
1	10116.ENSRNOP00000001110 (pp) 10116.ENSRNOP00000009917	TNFa	IFNg	0.907614	7.34e-06	0.00725807	1.36192	0.0866112	0.0255814	4.66667	0.092	0	0	0	0	0	0.964	0.962
1	10116.ENSRNOP00000001110 (pp) 10116.ENSRNOP00000023327	TNFa	IL2	0.904616	8.83e-06	0.00806452	0.518115	0.302189	0.0697674	5.09848	0	0	0	0	0	0	0.952	0.952
1	10116.ENSRNOP00000006308 (pp) 10116.ENSRNOP00000010029	IL1b	IL4	0.90138	1.07e-05	0.00887097	-1.00617	0.157168	0.0383721	2.58333	0.078	0	0	0	0	0	0.954	0.952
1	10116.ENSRNOP00000003129 (pp) 10116.ENSRNOP00000010121	CD86	IL13	0.895905	1.46e-05	0.00967742	0.547605	0.291981	0.0674419	2.78182	0	0	0	0	0	0	0.726	0.726
1	10116.ENSRNOP00000009917 (pp) 10116.ENSRNOP00000072948	IFNg	PRLR	0.892624	1.75e-05	0.0104839	1.12114	0.131115	0.0337209	6.86667	0	0	0.65	0	0	0	0.704	0.189
1	10116.ENSRNOP00000006308 (pp) 10116.ENSRNOP00000023327	IL1b	IL2	0.887334	2.31e-05	0.0112903	-0.596958	0.275268	0.0593023	2.76515	0.071	0	0	0	0	0	0.987	0.986
1	10116.ENSRNOP00000001110 (pp) 10116.ENSRNOP00000025718	TNFa	Notch2	0.885185	2.57e-05	0.0120968	2.12029	0.0169906	0.0104651	36	0.089	0	0	0.044	0	0	0.409	0.376
1	10116.ENSRNOP00000006246 (pp) 10116.ENSRNOP00000072948	IL10	PRLR	0.883602	2.78e-05	0.0129032	0.320972	0.374116	0.0790698	6.86667	0	0	0.65	0	0	0	0.678	0.119
1	10116.ENSRNOP00000016690 (pp) 10116.ENSRNOP00000072948	CNTF	PRLR	0.878177	3.61e-05	0.0137097	0.549182	0.29144	0.0662791	5.0303	0.043	0	0.65	0	0	0	0.709	0.202
1	10116.ENSRNOP00000010029 (pp) 10116.ENSRNOP00000023327	IL4	IL2	0.873695	4.44e-05	0.0145161	-0.674376	0.250036	0.0546512	2.18182	0.26	0	0	0	0	0	0.997	0.996
1	10116.ENSRNOP00000001110 (pp) 10116.ENSRNOP00000006308	TNFa	IL1b	0.872059	4.78e-05	0.0153226	0.0614166	0.475514	0.094186	4	0.419	0	0	0	0	0	0.977	0.962
1	10116.ENSRNOP00000006246 (pp) 10116.ENSRNOP00000006308	IL10	IL1b	0.860446	7.84e-05	0.016129	-1.02369	0.152992	0.0372093	2.33333	0.458	0	0	0	0	0	0.975	0.956
1	10116.ENSRNOP00000006308 (pp) 10116.ENSRNOP00000009448	IL1b	MCP1	0.855912	9.4e-05	0.0169355	1.27945	0.100369	0.027907	2	0.275	0	0	0	0	0	0.937	0.917
1	10116.ENSRNOP00000013745 (pp) 10116.ENSRNOP00000022128	TIMP1	Fractalkine	0.855726	9.47e-05	0.0177419	2.24113	0.0125088	0.00813953	2.74848	0.049	0	0	0	0	0	0.526	0.523
1	10116.ENSRNOP00000001110 (pp) 10116.ENSRNOP00000009448	TNFa	MCP1	0.855459	9.57e-05	0.0185484	1.21919	0.111387	0.0313953	4	0.238	0	0	0	0	0	0.962	0.952
1	10116.ENSRNOP00000003129 (pp) 10116.ENSRNOP00000009917	CD86	IFNg	0.851349	0.000112197	0.0193548	-0.0508436	0.479725	0.0953488	3.28975	0.243	0.215	0	0	0	0	0.942	0.911
1	10116.ENSRNOP00000001110 (pp) 10116.ENSRNOP00000010029	TNFa	IL4	0.8478	0.000128218	0.0201613	0.513339	0.303857	0.0709302	4.91667	0	0	0	0	0	0	0.953	0.953
1	10116.ENSRNOP00000003129 (pp) 10116.ENSRNOP00000006246	CD86	IL10	0.836457	0.000192316	0.0209677	0.740104	0.229618	0.0488372	3.28975	0.207	0	0	0	0	0	0.919	0.902
1	10116.ENSRNOP00000006308 (pp) 10116.ENSRNOP00000009917	IL1b	IFNg	0.835729	0.000197177	0.0217742	-0.157408	0.437462	0.0848837	2.33333	0.279	0	0	0	0	0	0.994	0.992
1	10116.ENSRNOP00000010121 (pp) 10116.ENSRNOP00000026637	IL13	VEGF	0.830698	0.00023359	0.0225806	0.104436	0.458412	0.0883721	3.10404	0	0	0	0	0	0	0.456	0.456
1	10116.ENSRNOP00000016690 (pp) 10116.ENSRNOP00000026637	CNTF	VEGF	0.82344	0.000295527	0.0233871	-0.0360401	0.485625	0.0976744	3.06364	0	0	0	0	0	0	0.582	0.582
1	10116.ENSRNOP00000006308 (pp) 10116.ENSRNOP00000071252	IL1b	IL1a	0.816925	0.000361832	0.0241935	1.56881	0.0583455	0.0197674	2	0.928	0	0.9	0	0	0	0.999	0.994
1	10116.ENSRNOP00000009917 (pp) 10116.ENSRNOP00000071252	IFNg	IL1a	0.808786	0.000460976	0.025	0.674182	0.250098	0.055814	2.33333	0.153	0	0	0	0	0	0.976	0.973
1	10116.ENSRNOP00000006246 (pp) 10116.ENSRNOP00000010029	IL10	IL4	0.807986	0.000471799	0.0258065	-1.0334	0.15071	0.0360465	2.25	0.068	0	0	0	0	0	0.956	0.955
1	10116.ENSRNOP00000009917 (pp) 10116.ENSRNOP00000010121	IFNg	IL13	0.806628	0.000490625	0.0266129	0.0838967	0.466569	0.0930233	2.43182	0.055	0	0	0	0	0	0.929	0.928
1	10116.ENSRNOP00000009917 (pp) 10116.ENSRNOP00000010029	IFNg	IL4	0.797852	0.000627425	0.0274194	-0.989465	0.161218	0.0395349	2.25	0.152	0	0	0	0	0	0.96	0.955
1	10116.ENSRNOP00000003129 (pp) 10116.ENSRNOP00000071252	CD86	IL1a	0.787831	0.000819394	0.0282258	0.824537	0.204817	0.0476744	2.88975	0.163	0	0	0	0	0	0.818	0.792
1	10116.ENSRNOP00000006246 (pp) 10116.ENSRNOP00000071252	IL10	IL1a	0.786513	0.000847804	0.0290323	1.20188	0.114705	0.0325581	2.33333	0.229	0	0	0	0	0	0.964	0.955
1	10116.ENSRNOP00000009917 (pp) 10116.ENSRNOP00000016690	IFNg	CNTF	0.784612	0.000890158	0.0298387	0.129356	0.448538	0.0860465	3.32157	0	0	0	0	0	0	0.51	0.51
1	10116.ENSRNOP00000023327 (pp) 10116.ENSRNOP00000072948	IL2	PRLR	0.784308	0.000897084	0.0306452	-0.125088	0.450227	0.0872093	6.04848	0	0	0.65	0	0	0	0.699	0.176
1	10116.ENSRNOP00000006246 (pp) 10116.ENSRNOP00000010121	IL10	IL13	0.779512	0.00101218	0.0314516	0.0876177	0.46509	0.0918605	2.43182	0.092	0	0	0	0	0	0.928	0.924
1	10116.ENSRNOP00000070985 (pp) 10116.ENSRNOP00000071252	CINC2	IL1a	0.777848	0.00105478	0.0322581	0.904638	0.182829	0.0430233	4.14286	0.557	0	0	0	0	0	0.769	0.5
1	10116.ENSRNOP00000026637 (pp) 10116.ENSRNOP00000071252	VEGF	IL1a	0.776959	0.0010781	0.0330645	0.939382	0.173767	0.0418605	2.8746	0.051	0	0	0	0	0	0.446	0.44
1	10116.ENSRNOP00000006246 (pp) 10116.ENSRNOP00000016690	IL10	CNTF	0.773894	0.00116171	0.033871	-0.438903	0.330366	0.0744186	3.32157	0	0	0	0	0	0	0.523	0.523
1	10116.ENSRNOP00000009448 (pp) 10116.ENSRNOP00000023327	MCP1	IL2	0.771346	0.0012351	0.0346774	0.94985	0.171094	0.0406977	2.76515	0.044	0	0	0	0	0	0.867	0.866
1	10116.ENSRNOP00000006308 (pp) 10116.ENSRNOP00000016690	IL1b	CNTF	0.757734	0.00169215	0.0354839	-0.558805	0.288147	0.0651163	3.65491	0	0	0	0	0	0	0.564	0.564
1	10116.ENSRNOP00000023327 (pp) 10116.ENSRNOP00000071252	IL2	IL1a	0.754145	0.00183264	0.0362903	1.29502	0.0976561	0.0267442	2.76515	0.107	0.47	0	0	0	0	0.992	0.984
1	10116.ENSRNOP00000006246 (pp) 10116.ENSRNOP00000013745	IL10	TIMP1	0.742019	0.00237698	0.0370968	1.22649	0.110007	0.0302326	2.98182	0.131	0	0	0	0	0	0.839	0.822
1	10116.ENSRNOP00000006246 (pp) 10116.ENSRNOP00000009448	IL10	MCP1	0.733623	0.00282348	0.0379032	0.587	0.278602	0.0616279	2.33333	0.256	0	0	0	0	0	0.933	0.913
1	10116.ENSRNOP00000001110 (pp) 10116.ENSRNOP00000072445	TNFa	bNGF	0.732827	0.00286898	0.0387097	0.678275	0.248799	0.0534884	4.43182	0	0	0	0	0	0	0.769	0.769
1	10116.ENSRNOP00000001110 (pp) 10116.ENSRNOP00000013745	TNFa	TIMP1	0.728857	0.00310485	0.0395161	1.397	0.0812071	0.022093	4.58182	0	0	0	0	0	0	0.833	0.833
1	10116.ENSRNOP00000022128 (pp) 10116.ENSRNOP00000072445	Fractalkine	bNGF	0.712772	0.00422117	0.0403226	2.71798	0.00328405	0.00116279	2.59848	0.043	0	0	0	0	0	0.568	0.567
1	10116.ENSRNOP00000009917 (pp) 10116.ENSRNOP00000072445	IFNg	bNGF	0.699683	0.00534337	0.041129	0.526108	0.299407	0.0686047	2.76515	0.042	0	0	0	0	0	0.652	0.652
1	10116.ENSRNOP00000006246 (pp) 10116.ENSRNOP00000072445	IL10	bNGF	0.695746	0.00572278	0.0419355	0.699806	0.242024	0.0523256	2.76515	0.061	0	0	0	0	0	0.743	0.737
1	10116.ENSRNOP00000001110 (pp) 10116.ENSRNOP00000003129	TNFa	CD86	0.690348	0.00627677	0.0427419	0.589196	0.277865	0.0604651	4.88975	0.116	0	0	0	0	0	0.871	0.86
1	10116.ENSRNOP00000003129 (pp) 10116.ENSRNOP00000022128	CD86	Fractalkine	0.684077	0.0069718	0.0435484	1.64137	0.0503599	0.0162791	2.68975	0.107	0	0	0	0	0	0.567	0.535
1	10116.ENSRNOP00000009448 (pp) 10116.ENSRNOP00000009917	MCP1	IFNg	0.683984	0.00698254	0.0443548	1.26413	0.103091	0.0290698	2.33333	0.208	0	0	0	0	0	0.93	0.915
1	10116.ENSRNOP00000003129 (pp) 10116.ENSRNOP00000023327	CD86	IL2	0.682512	0.00715422	0.0451613	-0.0162764	0.493507	0.0988372	2.78182	0.057	0	0	0	0	0	0.812	0.809
1	10116.ENSRNOP00000010121 (pp) 10116.ENSRNOP00000023327	IL13	IL2	0.672968	0.00834838	0.0459677	-0.173944	0.430955	0.0825581	2	0.112	0.424	0	0	0	0	0.947	0.904
1	10116.ENSRNOP00000013745 (pp) 10116.ENSRNOP00000023327	TIMP1	IL2	0.672163	0.00845572	0.0467742	1.43762	0.0752716	0.0209302	3.03182	0	0	0	0	0	0	0.527	0.527
1	10116.ENSRNOP00000009917 (pp) 10116.ENSRNOP00000013745	IFNg	TIMP1	0.671441	0.00855291	0.0475806	1.0994	0.135796	0.0348837	2.98182	0.133	0	0	0	0	0	0.703	0.672
1	10116.ENSRNOP00000010029 (pp) 10116.ENSRNOP00000071252	IL4	IL1a	0.66298	0.00975756	0.0483871	0.737414	0.230435	0.05	2.58333	0.107	0	0	0	0	0	0.966	0.963
1	10116.ENSRNOP00000006308 (pp) 10116.ENSRNOP00000010121	IL1b	IL13	0.662215	0.00987264	0.0491935	-0.370811	0.355389	0.077907	2.76515	0.075	0	0	0	0	0	0.906	0.903
1	10116.ENSRNOP00000001110 (pp) 10116.ENSRNOP00000022128	TNFa	Fractalkine	0.661916	0.00991781	0.05	2.3581	0.00918445	0.00465116	4.16667	0	0	0	0	0	0	0.777	0.777
1	10116.ENSRNOP00000006246 (pp) 10116.ENSRNOP00000022128	IL10	Fractalkine	0.66042	0.0101466	0.0508065	2.27116	0.0115687	0.00697674	2.5	0.068	0	0	0	0	0	0.772	0.765
1	10116.ENSRNOP00000006246 (pp) 10116.ENSRNOP00000070985	IL10	CINC2	0.657869	0.0105461	0.0516129	-0.101945	0.4594	0.0895349	5.14286	0.166	0	0	0	0	0	0.543	0.474
1	10116.ENSRNOP00000009917 (pp) 10116.ENSRNOP00000070985	IFNg	CINC2	0.653853	0.0111993	0.0524194	-0.566402	0.28556	0.0627907	5.14286	0.107	0	0	0	0	0	0.4	0.355
1	10116.ENSRNOP00000001110 (pp) 10116.ENSRNOP00000016690	TNFa	CNTF	0.63843	0.0140016	0.0532258	-0.475424	0.317242	0.072093	5.98824	0	0	0	0	0	0	0.553	0.553
1	10116.ENSRNOP00000003129 (pp) 10116.ENSRNOP00000072445	CD86	bNGF	0.638146	0.0140578	0.0540323	0.0439372	0.482477	0.0965116	2.78586	0	0	0	0	0	0	0.4	0.4
1	10116.ENSRNOP00000023327 (pp) 10116.ENSRNOP00000072445	IL2	bNGF	0.637768	0.0141328	0.0548387	0.00970096	0.49613	0.1	2.69697	0	0	0	0	0	0	0.534	0.534
1	10116.ENSRNOP00000010029 (pp) 10116.ENSRNOP00000072948	IL4	PRLR	0.636913	0.0143036	0.0556452	-0.474963	0.317407	0.0732558	5.86667	0.101	0	0.65	0	0	0	0.698	0.118
1	10116.ENSRNOP00000009917 (pp) 10116.ENSRNOP00000022128	IFNg	Fractalkine	0.634439	0.014807	0.0564516	1.94452	0.0259166	0.0127907	2.5	0.101	0	0	0	0	0	0.875	0.867
1	10116.ENSRNOP00000003129 (pp) 10116.ENSRNOP00000006308	CD86	IL1b	0.624886	0.0168782	0.0572581	-0.561891	0.287095	0.0639535	2.88975	0.254	0	0	0	0	0	0.855	0.814
1	10116.ENSRNOP00000001110 (pp) 10116.ENSRNOP00000071252	TNFa	IL1a	0.613912	0.0195212	0.0580645	0.380004	0.351971	0.0767442	4	0.46	0	0	0	0	0	0.958	0.926
1	10116.ENSRNOP00000010029 (pp) 10116.ENSRNOP00000016690	IL4	CNTF	0.609426	0.0206875	0.058871	-0.719778	0.235831	0.0511628	3.03586	0	0	0	0	0	0	0.436	0.436
1	10116.ENSRNOP00000013745 (pp) 10116.ENSRNOP00000072445	TIMP1	bNGF	0.606403	0.0215023	0.0596774	1.7637	0.0388914	0.0139535	2.63182	0.092	0	0	0	0	0	0.523	0.497
1	10116.ENSRNOP00000022128 (pp) 10116.ENSRNOP00000023327	Fractalkine	IL2	0.601858	0.0227731	0.0604839	2.19649	0.0140284	0.00930233	2.93182	0.049	0	0	0	0	0	0.76	0.758
1	10116.ENSRNOP00000009448 (pp) 10116.ENSRNOP00000013745	MCP1	TIMP1	0.591832	0.025775	0.0612903	0.430336	0.333476	0.0755814	2.58182	0.438	0	0	0	0	0	0.889	0.811
1	10116.ENSRNOP00000016690 (pp) 10116.ENSRNOP00000072445	CNTF	bNGF	0.578544	0.0301986	0.0620968	0.841722	0.199972	0.0465116	3.11919	0	0	0	0	0	0	0.878	0.878
1	10116.ENSRNOP00000006308 (pp) 10116.ENSRNOP00000013745	IL1b	TIMP1	0.572835	0.0322631	0.0629032	0.654771	0.256308	0.0581395	2.58182	0.178	0	0	0	0	0	0.778	0.741
1	10116.ENSRNOP00000010029 (pp) 10116.ENSRNOP00000072445	IL4	bNGF	0.571501	0.0327604	0.0637097	-0.240077	0.405135	0.0802326	2.51515	0.047	0	0	0	0	0	0.635	0.633
1	10116.ENSRNOP00000001110 (pp) 10116.ENSRNOP00000010121	TNFa	IL13	0.562079	0.0364353	0.0645161	0.0963511	0.461621	0.0906977	5.09848	0	0	0	0	0	0	0.922	0.922
1	10116.ENSRNOP00000006308 (pp) 10116.ENSRNOP00000072445	IL1b	bNGF	0.537307	0.0475429	0.0653226	-0.167187	0.433612	0.0837209	2.43182	0	0	0	0	0	0	0.761	0.761
1	10116.ENSRNOP00000010029 (pp) 10116.ENSRNOP00000010121	IL4	IL13	0.530936	0.0507595	0.066129	-1.37026	0.0853024	0.0244186	2.18182	0.238	0	0	0	0	0	0.976	0.97
1	10116.ENSRNOP00000022128 (pp) 10116.ENSRNOP00000070985	Fractalkine	CINC2	0.519795	0.0567593	0.0669355	1.62971	0.0515815	0.0174419	3.85714	0.061	0	0	0	0	0	0.53	0.521
1	10116.ENSRNOP00000009917 (pp) 10116.ENSRNOP00000026637	IFNg	VEGF	0.509246	0.0628965	0.0677419	-0.848566	0.198061	0.0453488	3.20794	0	0	0	0	0	0	0.561	0.561
1	10116.ENSRNOP00000003129 (pp) 10116.ENSRNOP00000010029	CD86	IL4	0.508493	0.063352	0.0685484	-1.58152	0.0568793	0.0186047	3.00404	0.088	0	0	0	0	0	0.884	0.878
1	10116.ENSRNOP00000009448 (pp) 10116.ENSRNOP00000071252	MCP1	IL1a	0.489035	0.0759592	0.0693548	1.39485	0.0815307	0.0232558	2	0.161	0	0	0	0	0	0.898	0.884
1	10116.ENSRNOP00000010029 (pp) 10116.ENSRNOP00000013745	IL4	TIMP1	0.484524	0.0791179	0.0701613	0.512392	0.304188	-	3.23182	0	0	0	0	0	0	0.613	0.613
1	10116.ENSRNOP00000013745 (pp) 10116.ENSRNOP00000070985	TIMP1	CINC2	0.482605	0.0804894	0.0709677	1.01176	0.155826	-	3.28571	0.12	0	0	0	0	0	0.463	0.415
1	10116.ENSRNOP00000009448 (pp) 10116.ENSRNOP00000016690	MCP1	CNTF	0.481644	0.081183	0.0717742	0.25558	0.399138	-	3.65491	0	0	0	0	0	0	0.438	0.438
1	10116.ENSRNOP00000009448 (pp) 10116.ENSRNOP00000072445	MCP1	bNGF	0.477252	0.0844035	0.0725806	0.603157	0.273202	-	2.43182	0.057	0	0	0	0	0	0.652	0.646
1	10116.ENSRNOP00000010121 (pp) 10116.ENSRNOP00000022128	IL13	Fractalkine	0.47053	0.089505	0.0733871	0.82989	0.2033	-	2.93182	0	0	0	0	0	0	0.665	0.665
1	10116.ENSRNOP00000010121 (pp) 10116.ENSRNOP00000072445	IL13	bNGF	0.469019	0.0906811	0.0741935	0.246995	0.402456	-	2.69697	0.067	0	0	0	0	0	0.538	0.526
1	10116.ENSRNOP00000006308 (pp) 10116.ENSRNOP00000070985	IL1b	CINC2	0.465264	0.0936496	0.075	-0.834385	0.202032	-	4.14286	0.689	0	0	0	0	0	0.846	0.526
1	10116.ENSRNOP00000006246 (pp) 10116.ENSRNOP00000026637	IL10	VEGF	0.459502	0.098335	0.0758065	-1.07995	0.140082	-	3.20794	0	0	0	0	0	0	0.635	0.635
1	10116.ENSRNOP00000071252 (pp) 10116.ENSRNOP00000072445	IL1a	bNGF	0.458144	0.0994627	0.0766129	0.623474	0.266487	-	2.43182	0	0	0	0	0	0	0.552	0.552
1	10116.ENSRNOP00000006308 (pp) 10116.ENSRNOP00000026637	IL1b	VEGF	0.453769	0.103155	0.0774194	-0.921663	0.178352	-	2.8746	0.049	0	0	0	0	0	0.693	0.691
1	10116.ENSRNOP00000010121 (pp) 10116.ENSRNOP00000013745	IL13	TIMP1	0.451908	0.104755	0.0782258	0.408622	0.341409	-	3.03182	0	0	0	0	0	0	0.6	0.6
1	10116.ENSRNOP00000003129 (pp) 10116.ENSRNOP00000009448	CD86	MCP1	0.445531	0.110364	0.0790323	0.812494	0.208254	-	2.88975	0.144	0	0	0	0	0	0.734	0.702
1	10116.ENSRNOP00000013745 (pp) 10116.ENSRNOP00000071252	TIMP1	IL1a	0.444443	0.111341	0.0798387	0.253949	0.399768	-	2.58182	0.137	0	0	0	0	0	0.652	0.614
1	10116.ENSRNOP00000009448 (pp) 10116.ENSRNOP00000022128	MCP1	Fractalkine	0.423761	0.131054	0.0806452	1.27563	0.101043	-	2.16667	0.078	0	0	0.07	0	0	0.901	0.894
1	10116.ENSRNOP00000006308 (pp) 10116.ENSRNOP00000022128	IL1b	Fractalkine	0.401652	0.154587	0.0814516	1.30244	0.0963834	-	2.16667	0.068	0	0	0	0	0	0.861	0.857
1	10116.ENSRNOP00000001110 (pp) 10116.ENSRNOP00000070985	TNFa	CINC2	0.395877	0.161163	0.0822581	-0.361361	0.358915	-	6.14286	0.121	0	0	0	0	0	0.53	0.487
1	10116.ENSRNOP00000016690 (pp) 10116.ENSRNOP00000022128	CNTF	Fractalkine	0.394774	0.16244	0.0830645	1.63528	0.0509949	-	3.82157	0	0	0	0	0	0	0.487	0.488
1	10116.ENSRNOP00000010029 (pp) 10116.ENSRNOP00000022128	IL4	Fractalkine	0.374198	0.187473	0.083871	1.06441	0.143571	-	2.75	0.129	0	0	0	0	0	0.735	0.708
1	10116.ENSRNOP00000022128 (pp) 10116.ENSRNOP00000071252	Fractalkine	IL1a	0.367067	0.196694	0.0846774	1.37827	0.0840605	-	2.16667	0.043	0	0	0	0	0	0.797	0.796
1	10116.ENSRNOP00000009448 (pp) 10116.ENSRNOP00000010121	MCP1	IL13	0.360211	0.205826	0.0854839	0.432888	0.332548	-	2.76515	0	0	0	0	0	0	0.817	0.817
1	10116.ENSRNOP00000006246 (pp) 10116.ENSRNOP00000019673	IL10	IL1r1	0.32018	0.264416	0.0862903	-0.513715	0.303726	-	3.53975	0.073	0	0	0	0	0	0.795	0.788
1	10116.ENSRNOP00000023327 (pp) 10116.ENSRNOP00000026637	IL2	VEGF	0.311192	0.278811	0.0870968	-1.12223	0.130883	-	3.10404	0.043	0	0	0	0	0	0.488	0.487
1	10116.ENSRNOP00000006308 (pp) 10116.ENSRNOP00000019673	IL1b	IL1r1	0.306275	0.286877	0.0879032	-0.431981	0.332878	-	3.13975	0.087	0	0.9	0.783	0	0	0.999	0.997
1	10116.ENSRNOP00000001110 (pp) 10116.ENSRNOP00000019673	TNFa	IL1r1	0.303926	0.290779	0.0887097	0.00181319	0.499277	-	5.13975	0	0	0	0	0	0	0.794	0.794
1	10116.ENSRNOP00000010029 (pp) 10116.ENSRNOP00000026637	IL4	VEGF	0.293075	0.3092	0.0895161	-1.33824	0.0904096	-	2.92222	0	0	0	0.059	0	0	0.509	0.499
1	10116.ENSRNOP00000009917 (pp) 10116.ENSRNOP00000019673	IFNg	IL1r1	0.261169	0.367113	0.0903226	0.241664	0.40452	-	3.53975	0	0	0	0	0	0	0.72	0.72
1	10116.ENSRNOP00000001110 (pp) 10116.ENSRNOP00000026637	TNFa	VEGF	0.246919	0.394746	0.091129	-1.19533	0.115979	-	4.8746	0	0	0	0	0	0	0.744	0.744
1	10116.ENSRNOP00000019673 (pp) 10116.ENSRNOP00000023327	IL1r1	IL2	0.228627	0.431757	0.0919355	-0.676775	0.249275	-	3.00404	0.075	0	0	0	0	0	0.577	0.562
1	10116.ENSRNOP00000019673 (pp) 10116.ENSRNOP00000071252	IL1r1	IL1a	0.211843	0.467191	0.0927419	0.185303	0.426496	-	3.13975	0.114	0	0.9	0.328	0	0	0.999	0.995
1	10116.ENSRNOP00000003129 (pp) 10116.ENSRNOP00000019673	CD86	IL1r1	0.189463	0.516513	0.0935484	-0.741821	0.229098	-	2.18182	0.057	0.27	0	0	0	0	0.523	0.363
1	10116.ENSRNOP00000009448 (pp) 10116.ENSRNOP00000070985	MCP1	CINC2	0.179031	0.540274	0.0943548	0.192194	0.423795	-	4.14286	0.143	0	0	0	0	0	0.599	0.551
1	10116.ENSRNOP00000026637 (pp) 10116.ENSRNOP00000072445	VEGF	bNGF	0.170867	0.559192	0.0951613	-0.45352	0.325087	-	2.36667	0	0	0	0	0	0	0.57	0.57
1	10116.ENSRNOP00000010029 (pp) 10116.ENSRNOP00000019673	IL4	IL1r1	0.168762	0.564114	0.0959677	-0.986192	0.162019	-	3.25404	0.081	0	0	0	0	0	0.694	0.68
1	10116.ENSRNOP00000009448 (pp) 10116.ENSRNOP00000019673	MCP1	IL1r1	0.147753	0.614205	0.0967742	-0.83586	0.201617	-	3.13975	0.07	0	0	0	0	0	0.607	0.594
1	10116.ENSRNOP00000009448 (pp) 10116.ENSRNOP00000026637	MCP1	VEGF	0.126202	0.667264	0.0975806	-0.180135	0.428523	-	2.8746	0.044	0	0	0	0	0	0.661	0.66
1	10116.ENSRNOP00000013745 (pp) 10116.ENSRNOP00000026637	TIMP1	VEGF	0.108153	0.712853	0.0983871	-0.605301	0.27249	-	2.65238	0	0	0	0	0	0	0.563	0.563
1	10116.ENSRNOP00000019673 (pp) 10116.ENSRNOP00000022128	IL1r1	Fractalkine	0.0843092	0.774453	0.0991935	0.241664	0.40452	-	2.91753	0.084	0	0	0	0	0	0.436	0.41
1	10116.ENSRNOP00000010121 (pp) 10116.ENSRNOP00000019673	IL13	IL1r1	0.0831924	0.777372	0.1	-0.863933	0.193812	-	3.00404	0.073	0	0	0	0	0	0.659	0.648
2	10116.ENSRNOP00000006070 (pp) 10116.ENSRNOP00000009764	Decorin	HGF	0.716397	0.00394578	0.0285714	0.575791	0.282378	0.0714286	14	0	0	0	0.051	0	0	0.729	0.726
2	10116.ENSRNOP00000006070 (pp) 10116.ENSRNOP00000026212	Decorin	Notch1	0.538421	0.0469958	0.0642857	-0.647127	0.258775	0.0571429	2	0.047	0	0	0.1	0	0	0.659	0.635
2	10116.ENSRNOP00000009756 (pp) 10116.ENSRNOP00000030704	Eotaxin	IL3	-0.671856	0.00849696	0.0428571	-1.2786	0.100519	0.0142857	6	0.079	0	0	0	0	0	0.766	0.756
2	10116.ENSRNOP00000009756 (pp) 10116.ENSRNOP00000015139	Eotaxin	MIP1a	-0.55787	0.0381718	0.0571429	-1.03767	0.149711	0.0285714	4	0.102	0.083	0	0	0	0	0.457	0.393
2	10116.ENSRNOP00000009756 (pp) 10116.ENSRNOP00000014865	Eotaxin	RANTES	0.734471	0.00277558	0.0214286	0.735067	0.231149	0.0428571	6	0.098	0	0.9	0.702	0	0	0.975	0.205
2	10116.ENSRNOP00000009764 (pp) 10116.ENSRNOP00000030704	HGF	IL3	-0.222893	0.443707	0.0928571	-0.712624	0.238039	0.05	14	0.074	0	0	0	0	0	0.442	0.422
2	10116.ENSRNOP00000009764 (pp) 10116.ENSRNOP00000015139	HGF	MIP1a	-0.073726	0.802218	0.1	-0.362605	0.35845	0.0785714	8	0.064	0	0	0	0	0	0.476	0.464
2	10116.ENSRNOP00000009764 (pp) 10116.ENSRNOP00000026212	HGF	Notch1	0.742613	0.00234765	0.0142857	0.193131	0.423428	0.0928571	14	0.052	0	0	0.099	0	0	0.641	0.614
2	10116.ENSRNOP00000009764 (pp) 10116.ENSRNOP00000014865	HGF	RANTES	0.690162	0.00629654	0.0357143	1.37594	0.0844201	0.00714286	14	0.042	0	0	0	0	0	0.539	0.539
2	10116.ENSRNOP00000030704 (pp) 10116.ENSRNOP00000076296	IL3	FLT3LG	-0.227157	0.434806	0.0857143	0.34819	0.363849	0.0857143	16	0	0	0	0	0	0	0.721	0.721
2	10116.ENSRNOP00000015139 (pp) 10116.ENSRNOP00000030704	MIP1a	IL3	0.928559	1.64e-06	0.00714286	0.0611556	0.475618	0.1	4	0.056	0	0	0	0	0	0.748	0.743
2	10116.ENSRNOP00000014865 (pp) 10116.ENSRNOP00000030704	RANTES	IL3	-0.451546	0.105067	0.0714286	-0.922216	0.178208	0.0357143	8	0.064	0	0	0	0	0	0.748	0.741
2	10116.ENSRNOP00000014865 (pp) 10116.ENSRNOP00000015139	RANTES	MIP1a	-0.268032	0.354189	0.0785714	-0.608847	0.271313	0.0642857	4	0.262	0.067	0.9	0	0	0	0.976	0.696
2	10116.ENSRNOP00000004843 (pp) 10116.ENSRNOP00000014865	Tnfrsf12a	RANTES	0.648034	0.0122006	0.05	1.20307	0.114474	0.0214286	16	0	0	0	0	0	0	0.525	0.525
3	10116.ENSRNOP00000013732 (pp) 10116.ENSRNOP00000034235	IL6	GMCSF	0.92826	1.68e-06	0.0047619	2.91375	0.00178559	0.025	3.66667	0.177	0	0	0	0	0	0.929	0.917
3	10116.ENSRNOP00000013732 (pp) 10116.ENSRNOP00000028066	IL6	ICAM1	-0.630119	0.0157181	0.0142857	-1.3806	0.0837015	0.05	4.5	0.13	0	0	0	0	0	0.919	0.911
3	10116.ENSRNOP00000003823 (pp) 10116.ENSRNOP00000013732	CXCL5	IL6	-0.597976	0.0239023	0.0190476	-1.32294	0.0929275	0.075	5.16667	0.239	0	0	0	0	0	0.868	0.834
3	10116.ENSRNOP00000028066 (pp) 10116.ENSRNOP00000034235	ICAM1	GMCSF	-0.661261	0.0100175	0.00952381	-1.19102	0.116824	0.1	2.5	0.055	0	0	0	0	0	0.722	0.718
3	10116.ENSRNOP00000013732 (pp) 10116.ENSRNOP00000074787	IL6	PDGFA	0.542972	0.0448096	0.0238095	-0.192224	0.423784	-	11	0.048	0	0	0	0	0	0.539	0.536
3	10116.ENSRNOP00000003823 (pp) 10116.ENSRNOP00000034235	CXCL5	GMCSF	-0.509437	0.0627816	0.0285714	-0.482524	0.314717	-	3.83333	0.264	0	0	0	0	0	0.799	0.739
3	10116.ENSRNOP00000003794 (pp) 10116.ENSRNOP00000013732	CXCL7	IL6	-0.507574	0.0639115	0.0333333	-0.432441	0.33271	-	4.5	0.26	0	0	0	0	0	0.599	0.479
3	10116.ENSRNOP00000028066 (pp) 10116.ENSRNOP00000070344	ICAM1	Galectin-3	0.483912	0.0795538	0.0380952	1.96866	0.0244961	-	3.33333	0.101	0	0	0	0	0	0.678	0.657
3	10116.ENSRNOP00000003823 (pp) 10116.ENSRNOP00000028066	CXCL5	ICAM1	0.475232	0.0859146	0.0428571	1.64868	0.0496066	-	4.66667	0.075	0	0	0	0	0	0.574	0.558
3	10116.ENSRNOP00000003794 (pp) 10116.ENSRNOP00000003823	CXCL7	CXCL5	0.471248	0.0889503	0.047619	0.502777	0.307561	-	3	0.257	0.088	0.4	0.517	0	0	0.852	0.364
3	10116.ENSRNOP00000003823 (pp) 10116.ENSRNOP00000057330	CXCL5	CCL27	-0.380083	0.180076	0.052381	-0.836643	0.201397	-	3.66667	0	0	0	0.291	0	0	0.669	0.552
3	10116.ENSRNOP00000003733 (pp) 10116.ENSRNOP00000028066	L-Selectin	ICAM1	0.370897	0.191707	0.0571429	-0.353311	0.361928	-	4.66667	0.149	0	0	0	0	0	0.925	0.915
3	10116.ENSRNOP00000013732 (pp) 10116.ENSRNOP00000070344	IL6	Galectin-3	-0.33939	0.235175	0.0619048	-1.8761	0.030321	-	8.33333	0.044	0	0	0	0	0	0.683	0.682
3	10116.ENSRNOP00000003794 (pp) 10116.ENSRNOP00000057330	CXCL7	CCL27	-0.30054	0.296457	0.0666667	0.23959	0.405324	-	3.66667	0	0	0	0.291	0	0	0.558	0.402
3	10116.ENSRNOP00000003794 (pp) 10116.ENSRNOP00000034235	CXCL7	GMCSF	-0.275631	0.340175	0.0714286	0.637639	0.261854	-	4.16667	0.101	0	0	0	0	0	0.508	0.475
3	10116.ENSRNOP00000034235 (pp) 10116.ENSRNOP00000070344	GMCSF	Galectin-3	-0.263218	0.363228	0.0761905	-0.742204	0.228982	-	4.33333	0.044	0	0	0	0	0	0.414	0.413
3	10116.ENSRNOP00000013732 (pp) 10116.ENSRNOP00000057330	IL6	CCL27	0.249743	0.389185	0.0809524	-0.61566	0.269059	-	8.66667	0	0	0	0	0	0	0.413	0.413
3	10116.ENSRNOP00000003733 (pp) 10116.ENSRNOP00000003794	L-Selectin	CXCL7	0.241095	0.406346	0.0857143	-0.501126	0.308141	-	5	0.208	0	0	0	0	0	0.514	0.412
3	10116.ENSRNOP00000003733 (pp) 10116.ENSRNOP00000034235	L-Selectin	GMCSF	0.214417	0.461668	0.0904762	1.47013	0.0707626	-	4.16667	0.068	0	0	0	0	0	0.684	0.675
3	10116.ENSRNOP00000003733 (pp) 10116.ENSRNOP00000013732	L-Selectin	IL6	0.132329	0.652018	0.0952381	0.539475	0.29478	-	4.16667	0.138	0	0	0	0	0	0.731	0.701
3	10116.ENSRNOP00000003733 (pp) 10116.ENSRNOP00000074787	L-Selectin	PDGFA	-0.103541	0.724655	0.1	0.1124	0.455253	-	5	0	0	0	0	0	0	0.403	0.403
4	10116.ENSRNOP00000008471 (pp) 10116.ENSRNOP00000016091	SCF	IL7	0.9378	7.30549e-07	0.0125	2.41639	0.00783761	0.0142857	10	0	0	0	0	0	0	0.785	0.785
4	10116.ENSRNOP00000009776 (pp) 10116.ENSRNOP00000016717	IL22	IL17F	0.776435	0.00109205	0.0625	2.19877	0.013947	0.0285714	2	0.243	0	0	0	0	0	0.913	0.89
4	10116.ENSRNOP00000009776 (pp) 10116.ENSRNOP00000016091	IL22	IL7	0.887265	2.31503e-05	0.025	1.88813	0.0295041	0.0428571	6	0	0	0	0	0	0	0.616	0.616
4	10116.ENSRNOP00000009776 (pp) 10116.ENSRNOP00000066383	IL22	IL2ra	0.593155	0.0253626	0.075	1.64416	0.0500711	0.0571429	2	0	0	0.65	0	0	0	0.789	0.424
4	10116.ENSRNOP00000016091 (pp) 10116.ENSRNOP00000016717	IL7	IL17F	0.88198	3.01153e-05	0.0375	1.60823	0.0538919	0.0714286	6	0	0	0	0	0	0	0.515	0.515
4	10116.ENSRNOP00000016091 (pp) 10116.ENSRNOP00000040482	IL7	TREM1	0.790728	0.000759623	0.05	0.767599	0.221363	0.0857143	10	0	0	0	0	0	0	0.4	0.4
4	10116.ENSRNOP00000016091 (pp) 10116.ENSRNOP00000066383	IL7	IL2ra	0.516941	0.0583754	0.0875	0.295958	0.383631	0.1	6	0.068	0	0.65	0	0	0	0.933	0.812
4	10116.ENSRNOP00000016717 (pp) 10116.ENSRNOP00000066383	IL17F	IL2ra	0.403714	0.152282	0.1	-0.261404	0.39689	-	2	0.092	0	0	0	0	0	0.423	0.391
5	10116.ENSRNOP00000002089 (pp) 10116.ENSRNOP00000003778	CD80	CINC1	0	1	-	0.533602	0.296809	-	4	0.076	0	0	0.104	0	0	0.554	0.505
5	10116.ENSRNOP00000003778 (pp) 10116.ENSRNOP00000004290	CINC1	TIMP2	-0.174005	0.551887	-	-0.834521	0.201994	-	4	0.077	0	0	0	0	0	0.641	0.627
