# Supplementary material for: Network-Level Organization of Systemic Inflammation Reflects Early Alzheimer’s-Like Behavioral Changes
Source: Research Square preprint supplement (doi:10.21203/rs.3.rs-7482654/v1), 2025-10-14
Supplement: Supplementary file 2 [file 4cfd10d2832710d5b6a2671c.xlsx]

## Sheet: KEGG
Term	Overlap	P-value	Adjusted P-value	#NAME?	Old P-value	Old Adjusted P-value	Odds Ratio	Combined Score	Genes
Allograft rejection	1938-01-01	0.0151018	0.0395891	1.4	0	0	77.0463	323.051	CD80
Graft-versus-host disease	1942-01-01	0.0166798	0.0395891	1.4	0	0	69.5157	284.566	CD80
Type I diabetes mellitus	1943-01-01	0.017074	0.0395891	1.4	0	0	67.8571	276.192	CD80
Intestinal immune network for IgA production	1948-01-01	0.0190426	0.0395891	1.4	0	0	60.6231	240.133	CD80
Autoimmune thyroid disease	1953-01-01	0.0210079	0.0395891	1.4	0	0	54.7802	211.608	CD80
Viral myocarditis	1960-01-01	0.0237535	0.0395891	1.4	0	0	48.2639	180.508	CD80
Rheumatoid arthritis	1993-01-01	0.0366063	0.0510719	1.29	0	0	30.9006	102.205	CD80
Toll-like receptor signaling pathway	1/104	0.0408575	0.0510719	1.29	0	0	27.5853	88.2085	CD80
Systemic lupus erythematosus	1/135	0.0527501	0.0576988	1.24	0	0	21.1706	62.2878	CD80
Cell adhesion molecules	1/148	0.0576988	0.0576988	1.24	0	0	19.2857	55.0129	CD80

## Sheet: Reactome
Term	Overlap	P-value	Adjusted P-value	#NAME?	Old P-value	Old Adjusted P-value	Odds Ratio	Combined Score	Genes
TGFBR3 PTM Regulation	2025-01-11	0.00439224	0.0615473	1.21	0	0	285.457	1549.44	TIMP2
CD28 Dependent Vav1 Pathway	2025-01-12	0.0047907	0.0615473	1.21	0	0	259.494	1385.98	CD80
CTLA4 Inhibitory Signaling	2025-01-21	0.00837056	0.0615473	1.21	0	0	142.657	682.334	CD80
Formation of the Ureteric Bud	2025-01-21	0.00837056	0.0615473	1.21	0	0	142.657	682.334	GFRA1
CD28 Dependent PI3K Akt Signaling	2025-01-24	0.00956134	0.0615473	1.21	0	0	124.031	576.748	CD80
Activation of Matrix Metalloproteinases	1933-01-01	0.0131262	0.0615473	1.21	0	0	89.1071	386.114	TIMP2
CD28 Co-Stimulation	1935-01-01	0.0139168	0.0615473	1.21	0	0	83.8571	358.46	CD80
RET Signaling	1941-01-01	0.0162855	0.0615473	1.21	0	0	71.2571	293.4	GFRA1
NCAM1 Interactions	1942-01-01	0.0166798	0.0615473	1.21	0	0	69.5157	284.566	GFRA1
Interleukin-10 Signaling	1946-01-01	0.0182556	0.0615473	1.21	0	0	63.3238	253.503	CD80
Kidney Development	1946-01-01	0.0182556	0.0615473	1.21	0	0	63.3238	253.503	GFRA1
Signaling by TGFBR3	1949-01-01	0.019436	0.0615473	1.21	0	0	59.3571	233.905	TIMP2
NCAM Signaling for Neurite Out-Growth	1963-01-01	0.0249281	0.0728666	1.14	0	0	45.9217	169.532	GFRA1
Costimulation by the CD28 Family	1978-01-01	0.0307826	0.0829089	1.08	0	0	36.9481	128.609	CD80
Constitutive Signaling by Aberrant PI3K in Cancer	1983-01-01	0.0327272	0.0829089	1.08	0	0	34.6864	118.612	CD80
PI3K AKT Signaling in Cancer	1/110	0.0431694	0.0973566	1.01	0	0	26.059	81.8935	CD80
PI5P, PP2A and IER3 Regulate PI3K AKT Signaling	1/111	0.0435543	0.0973566	1.01	0	0	25.8208	80.9158	CD80
Negative Regulation of the PI3K AKT Network	1/118	0.0462444	0.0976271	1.01	0	0	24.2674	74.5935	CD80
Degradation of the Extracellular Matrix	1/140	0.0546561	0.109312	0.961	0	0	20.4039	59.3079	TIMP2
Signaling by TGFB Family Members	1/161	0.0626248	0.118987	0.924	0	0	17.7071	49.0593	TIMP2
Signal Transduction	2025-03-13	0.0751351	0.135959	0.867	0	0	3.99586	10.3432	CD80;TIMP2;GFRA1
RAF MAP Kinase Cascade	1/265	0.101229	0.169485	0.771	0	0	10.6753	24.4504	GFRA1
MAPK1 MAPK3 Signaling	1/271	0.103413	0.169485	0.771	0	0	10.4349	23.6771	GFRA1
PIP3 Activates AKT Signaling	1/281	0.107043	0.169485	0.771	0	0	10.0571	22.4729	CD80
Extracellular Matrix Organization	1/300	0.113904	0.170907	0.767	0	0	9.40898	20.4401	TIMP2
MAPK Family Signaling Cascades	1/314	0.11893	0.170907	0.767	0	0	8.98174	19.1241	GFRA1
Intracellular Signaling by Second Messengers	1/321	0.121434	0.170907	0.767	0	0	8.78214	18.5161	CD80
Diseases of Signal Transduction by Growth Factor Receptors and Second Messengers	1/451	0.166813	0.219029	0.659	0	0	6.20381	11.1103	CD80
Signaling by Interleukins	1/452	0.167154	0.219029	0.659	0	0	6.18974	11.0725	CD80
Neutrophil Degranulation	1/478	0.175976	0.222903	0.652	0	0	5.84456	10.1544	TIMP2
Axon Guidance	1/541	0.197015	0.241191	0.618	0	0	5.14603	8.35961	GFRA1
Nervous System Development	1/567	0.20556	0.241191	0.618	0	0	4.90308	7.75677	GFRA1
Immune System	1950-02-01	0.209456	0.241191	0.618	0	0	2.76909	4.32876	CD80;TIMP2
Cytokine Signaling in Immune System	1/776	0.271406	0.303336	0.518	0	0	3.5423	4.61966	CD80
Adaptive Immune System	1/854	0.294726	0.319989	0.495	0	0	3.20533	3.91597	CD80
Innate Immune System	1/1149	0.377128	0.39808	0.4	0	0	2.34495	2.28672	TIMP2
Developmental Biology	1/1385	0.436856	0.448663	0.348	0	0	1.92073	1.59065	GFRA1
Disease	2025-01-31	0.594033	0.594033	0.226	0	0	1.19799	0.623936	CD80

## Sheet: GO_BP
Term	Overlap	P-value	Adjusted P-value	#NAME?	Old P-value	Old Adjusted P-value	Odds Ratio	Combined Score	Genes
Negative Regulation of Membrane Protein Ectodomain Proteolysis (GO:0051045)	2025-01-06	0.00239786	0.0343214	1.46	0	0	571.057	3445.29	TIMP2
Regulation of T-helper 1 Cell Differentiation (GO:0045625)	2025-01-06	0.00239786	0.0343214	1.46	0	0	571.057	3445.29	CD80
Regulation of T Cell Mediated Immunity (GO:0002709)	2025-01-11	0.00439224	0.0343214	1.46	0	0	285.457	1549.44	CD80
Positive Regulation of Granulocyte Macrophage Colony-Stimulating Factor Production (GO:0032725)	2025-01-12	0.0047907	0.0343214	1.46	0	0	259.494	1385.98	CD80
Positive Regulation of T-helper Cell Differentiation (GO:0045624)	2025-01-12	0.0047907	0.0343214	1.46	0	0	259.494	1385.98	CD80
Glial Cell-Derived Neurotrophic Factor Receptor Signaling Pathway (GO:0035860)	2025-01-12	0.0047907	0.0343214	1.46	0	0	259.494	1385.98	GFRA1
Regulation of Granulocyte Macrophage Colony-Stimulating Factor Production (GO:0032645)	2025-01-14	0.0055872	0.0343214	1.46	0	0	219.549	1138.86	CD80
Negative Regulation of T Cell Mediated Immunity (GO:0002710)	2025-01-17	0.00678091	0.0364474	1.44	0	0	178.357	890.652	CD80
Negative Regulation of Peptidase Activity (GO:0010466)	2025-01-23	0.00916455	0.0371036	1.43	0	0	129.675	608.49	TIMP2
Positive Regulation of Cell Communication (GO:0010647)	2025-01-24	0.00956134	0.0371036	1.43	0	0	124.031	576.748	CD80
Regulation of Membrane Protein Ectodomain Proteolysis (GO:0051043)	2025-01-25	0.00995799	0.0371036	1.43	0	0	118.857	547.858	TIMP2
Positive Regulation of Interleukin-2 Production (GO:0032743)	2025-01-26	0.0103545	0.0371036	1.43	0	0	114.097	521.462	CD80
Positive Regulation of Signaling (GO:0023056)	2025-01-31	0.012335	0.0408003	1.39	0	0	95.0571	417.806	CD80
Negative Regulation of T Cell Proliferation (GO:0042130)	1939-01-01	0.0154965	0.0431871	1.36	0	0	75.015	312.598	CD80
Negative Regulation of Proteolysis (GO:0045861)	1940-01-01	0.0158911	0.0431871	1.36	0	0	73.0879	302.73	TIMP2
Negative Regulation of Lymphocyte Proliferation (GO:0050672)	1943-01-01	0.017074	0.0431871	1.36	0	0	67.8571	276.192	CD80
Regulation of Peptidyl-Tyrosine Phosphorylation (GO:0050730)	1943-01-01	0.017074	0.0431871	1.36	0	0	67.8571	276.192	CD80
Regulation of Interleukin-2 Production (GO:0032663)	1950-01-01	0.0198292	0.045167	1.35	0	0	58.1429	227.955	CD80
Negative Regulation of T Cell Activation (GO:0050868)	1951-01-01	0.0202222	0.045167	1.35	0	0	56.9771	222.266	CD80
Negative Regulation of Protein Catabolic Process (GO:0042177)	1953-01-01	0.0210079	0.045167	1.35	0	0	54.7802	211.608	TIMP2
Positive Regulation of Peptidyl-Tyrosine Phosphorylation (GO:0050731)	1963-01-01	0.0249281	0.0502522	1.3	0	0	45.9217	169.532	CD80
Positive Regulation of T Cell Proliferation (GO:0042102)	1965-01-01	0.0257104	0.0502522	1.3	0	0	44.4821	162.843	CD80
Positive Regulation of Lymphocyte Proliferation (GO:0050671)	1977-01-01	0.0303932	0.0568221	1.25	0	0	37.4361	130.784	CD80
Regulation of T Cell Proliferation (GO:0042129)	1983-01-01	0.0327272	0.0586362	1.23	0	0	34.6864	118.612	CD80
Positive Regulation of Response to Stimulus (GO:0048584)	1992-01-01	0.036219	0.0622966	1.21	0	0	31.2418	103.666	CD80
Positive Regulation of T Cell Activation (GO:0050870)	1/111	0.0435543	0.0701301	1.15	0	0	25.8208	80.9158	CD80
T Cell Activation (GO:0042110)	1/114	0.044708	0.0701301	1.15	0	0	25.1315	78.0986	CD80
Cellular Response to Molecule of Bacterial Origin (GO:0071219)	1/123	0.0481619	0.0701301	1.15	0	0	23.267	70.5731	CD80
Response to Cytokine (GO:0034097)	1/123	0.0481619	0.0701301	1.15	0	0	23.267	70.5731	TIMP2
Cellular Response to Lipopolysaccharide (GO:0071222)	1/125	0.048928	0.0701301	1.15	0	0	22.8894	69.0666	CD80
Response to Lipopolysaccharide (GO:0032496)	1/161	0.0626248	0.0868667	1.06	0	0	17.7071	49.0593	CD80
Positive Regulation of Protein Phosphorylation (GO:0001934)	1/171	0.0663988	0.0892233	1.05	0	0	16.6571	45.1755	CD80
Positive Regulation of Protein Metabolic Process (GO:0051247)	1/202	0.0780136	0.101654	0.993	0	0	14.0661	35.8808	CD80
Regulation of Signal Transduction (GO:0009966)	1/211	0.0813619	0.102899	0.988	0	0	13.4571	33.7619	CD80
Cellular Response to Lipid (GO:0071396)	1/234	0.0898703	0.110412	0.957	0	0	12.1147	29.1889	CD80
Positive Regulation of Signal Transduction (GO:0009967)	1/256	0.0979441	0.116989	0.932	0	0	11.0571	25.6897	CD80
Cell Surface Receptor Protein Tyrosine Kinase Signaling Pathway (GO:0007169)	1/296	0.112463	0.130701	0.884	0	0	9.5385	20.8428	GFRA1
Positive Regulation of Cytokine Production (GO:0001819)	1/325	0.122862	0.139028	0.857	0	0	8.67196	18.1825	CD80
Cellular Response to Oxygen-Containing Compound (GO:1901701)	1/384	0.143688	0.158425	0.8	0	0	7.31406	14.1901	CD80
Nervous System Development (GO:0007399)	1/480	0.176651	0.1899	0.721	0	0	5.81956	10.0887	GFRA1
Positive Regulation of RNA Biosynthetic Process (GO:1902680)	1/555	0.201626	0.211461	0.675	0	0	5.01238	8.02653	CD80
Positive Regulation of DNA-templated Transcription (GO:0045893)	1/1274	0.409419	0.419167	0.378	0	0	2.10066	1.87592	CD80
Regulation of DNA-templated Transcription (GO:0006355)	1939-01-01	0.595485	0.595485	0.225	0	0	1.19297	0.61841	CD80

## Sheet: GO_MF
Term	Overlap	P-value	Adjusted P-value	#NAME?	Old P-value	Old Adjusted P-value	Odds Ratio	Combined Score	Genes
Metalloendopeptidase Inhibitor Activity (GO:0008191)	2025-01-13	0.00518902	0.0415122	1.38	0	0	237.857	1251.42	TIMP2
Peptidase Inhibitor Activity (GO:0030414)	1940-01-01	0.0158911	0.0635643	1.2	0	0	73.0879	302.73	TIMP2
Cytokine Receptor Activity (GO:0004896)	1983-01-01	0.0327272	0.0746051	1.13	0	0	34.6864	118.612	GFRA1
Endopeptidase Inhibitor Activity (GO:0004866)	1/119	0.0466282	0.0746051	1.13	0	0	24.0605	73.7588	TIMP2
Protease Binding (GO:0002020)	1/119	0.0466282	0.0746051	1.13	0	0	24.0605	73.7588	TIMP2
Zinc Ion Binding (GO:0008270)	1/338	0.127488	0.162617	0.789	0	0	8.33192	17.1615	TIMP2
Receptor Ligand Activity (GO:0048018)	1/380	0.14229	0.162617	0.789	0	0	7.39276	14.4151	CD80
Transition Metal Ion Binding (GO:0046914)	1/458	0.169197	0.169197	0.772	0	0	6.1066	10.8495	TIMP2

## Sheet: GO_CC
Term	Overlap	P-value	Adjusted P-value	#NAME?	Old P-value	Old Adjusted P-value	Odds Ratio	Combined Score	Genes
Tertiary Granule Lumen (GO:1904724)	1954-01-01	0.0214005	0.106927	0.971	0	0	53.7439	206.61	TIMP2
Specific Granule Lumen (GO:0035580)	1961-01-01	0.0241451	0.106927	0.971	0	0	47.4571	176.715	TIMP2
Ficolin-1-Rich Granule Lumen (GO:1904813)	1/123	0.0481619	0.106927	0.971	0	0	23.267	70.5731	TIMP2
Specific Granule (GO:0042581)	1/159	0.0618685	0.106927	0.971	0	0	17.9331	49.9032	TIMP2
Tertiary Granule (GO:0070820)	1/163	0.0633807	0.106927	0.971	0	0	17.4868	48.2389	TIMP2
Ficolin-1-Rich Granule (GO:0101002)	1/184	0.071285	0.106927	0.971	0	0	15.4637	40.8407	TIMP2
Secretory Granule Lumen (GO:0034774)	1/316	0.119646	0.153831	0.813	0	0	8.92381	18.9472	TIMP2
Collagen-Containing Extracellular Matrix (GO:0062023)	1/383	0.143339	0.161256	0.792	0	0	7.33358	14.2458	TIMP2
Intracellular Organelle Lumen (GO:0070013)	1/912	0.311641	0.311641	0.506	0	0	2.99216	3.48856	TIMP2
