# Supplementary material for: Network-Level Organization of Systemic Inflammation Reflects Early Alzheimer’s-Like Behavioral Changes
Source: Research Square preprint supplement (doi:10.21203/rs.3.rs-7482654/v1), 2025-10-14
Supplement: Supplementary file 3 [file 5d4595ab9da55e59de234b87.xlsx]

## Sheet: KEGG
Term	Overlap	P-value	Adjusted P-value	#NAME?	Old P-value	Old Adjusted P-value	Odds Ratio	Combined Score	Genes
Rheumatoid arthritis	1993-03-01	1.14e-05	0.000459	3.33865	0	0	94.7619	1078.51	IL6;CXCL5;ICAM1
Viral protein interaction with cytokine and cytokine receptor	3/100	1.42e-05	0.000459	3.33865	0	0	87.8925	981.154	IL6;CCL27;CXCL5
TNF signaling pathway	3/112	1.99e-05	0.000459	3.33865	0	0	78.1691	846.026	IL6;CXCL5;ICAM1
African trypanosomiasis	1937-02-01	0.000148	0.00256092	2.5916	0	0	142.536	1256.48	IL6;ICAM1
Malaria	1950-02-01	0.000272	0.0037553	2.42536	0	0	103.865	852.651	IL6;ICAM1
Cytokine-cytokine receptor interaction	3/295	0.000353	0.00405949	2.39153	0	0	28.911	229.815	IL6;CCL27;CXCL5
Pertussis	1976-02-01	0.000629	0.00619748	2.20778	0	0	67.2838	496.003	IL6;CXCL5
IL-17 signaling pathway	1994-02-01	0.00096	0.00827704	2.08213	0	0	54.0707	375.733	IL6;CXCL5
AGE-RAGE signaling pathway in diabetic complications	2/100	0.00108504	0.00831863	2.07995	0	0	50.7449	346.392	IL6;ICAM1
Fluid shear stress and atherosclerosis	2/139	0.00208059	0.014356	1.84297	0	0	36.2281	223.712	PDGFA;ICAM1
JAK-STAT signaling pathway	2/162	0.00281169	0.017637	1.75358	0	0	30.9844	182.001	IL6;PDGFA
Influenza A	2/172	0.00316222	0.0181828	1.74034	0	0	29.1471	167.784	IL6;ICAM1
Transcriptional misregulation in cancer	2/192	0.00392179	0.0182243	1.73935	0	0	26.0526	144.363	IL6;PDGFA
Chemokine signaling pathway	2/192	0.00392179	0.0182243	1.73935	0	0	26.0526	144.363	CCL27;CXCL5
Kaposi sarcoma-associated herpesvirus infection	2/193	0.0039618	0.0182243	1.73935	0	0	25.9149	143.337	IL6;ICAM1
Epstein-Barr virus infection	2/202	0.00433051	0.0186753	1.72873	0	0	24.7375	134.623	IL6;ICAM1
Lipid and atherosclerosis	2/215	0.00489031	0.0194311	1.7115	0	0	23.2124	123.502	IL6;ICAM1
Human T-cell leukemia virus 1 infection	2/219	0.00506899	0.0194311	1.7115	0	0	22.78	120.383	IL6;ICAM1
PI3K-Akt signaling pathway	2/354	0.0127981	0.0464775	1.33276	0	0	13.9474	60.7893	IL6;PDGFA
Graft-versus-host disease	1942-01-01	0.0208071	0.0717846	1.14397	0	0	54.0623	209.354	IL6
Intestinal immune network for IgA production	1948-01-01	0.0237476	0.0780277	1.10775	0	0	47.1466	176.341	IL6
Pathways in cancer	2/531	0.0274922	0.08443	1.0735	0	0	9.19707	33.0529	IL6;PDGFA
Legionellosis	1957-01-01	0.0281433	0.08443	1.0735	0	0	39.5516	141.217	IL6
Viral myocarditis	1960-01-01	0.0296046	0.0850178	1.07049	0	0	37.5348	132.116	ICAM1
Cytosolic DNA-sensing pathway	1963-01-01	0.0310639	0.0850178	1.07049	0	0	35.7133	123.986	IL6
Inflammatory bowel disease	1965-01-01	0.0320357	0.0850178	1.07049	0	0	34.5938	119.034	IL6
Melanoma	1972-01-01	0.03543	0.0873902	1.05854	0	0	31.1721	104.121	PDGFA
Glioma	1975-01-01	0.0368814	0.0873902	1.05854	0	0	29.9039	98.6843	PDGFA
Gap junction	1988-01-01	0.0431482	0.0873902	1.05854	0	0	25.4189	79.8945	PDGFA
Hypertrophic cardiomyopathy	1990-01-01	0.0441091	0.0873902	1.05854	0	0	24.8452	77.5441	IL6
Staphylococcus aureus infection	1995-01-01	0.0465075	0.0873902	1.05854	0	0	23.5177	72.1558	ICAM1
Prostate cancer	1997-01-01	0.0474653	0.0873902	1.05854	0	0	23.0255	70.176	PDGFA
Choline metabolism in cancer	1998-01-01	0.0479439	0.0873902	1.05854	0	0	22.7869	69.2204	PDGFA
Hematopoietic cell lineage	1999-01-01	0.0484222	0.0873902	1.05854	0	0	22.5533	68.2868	IL6
Amoebiasis	1/102	0.0498561	0.0873902	1.05854	0	0	21.8801	65.61	IL6
Chagas disease	1/102	0.0498561	0.0873902	1.05854	0	0	21.8801	65.61	IL6
Toll-like receptor signaling pathway	1/104	0.0508108	0.0873902	1.05854	0	0	21.4531	63.9226	IL6
C-type lectin receptor signaling pathway	1/104	0.0508108	0.0873902	1.05854	0	0	21.4531	63.9226	IL6
NF-kappa B signaling pathway	1/104	0.0508108	0.0873902	1.05854	0	0	21.4531	63.9226	ICAM1
Th17 cell differentiation	1/107	0.0522414	0.0873902	1.05854	0	0	20.8428	61.5253	IL6
Insulin resistance	1/108	0.0527178	0.0873902	1.05854	0	0	20.6469	60.7598	IL6
HIF-1 signaling pathway	1/109	0.0531941	0.0873902	1.05854	0	0	20.4547	60.0103	IL6
Leukocyte transendothelial migration	1/114	0.0555719	0.0891735	1.04976	0	0	19.5447	56.4858	ICAM1
Natural killer cell mediated cytotoxicity	1/131	0.0636164	0.0975451	1.01079	0	0	16.9744	46.7624	ICAM1
FoxO signaling pathway	1/131	0.0636164	0.0975451	1.01079	0	0	16.9744	46.7624	IL6
Yersinia infection	1/137	0.0664408	0.0989205	1.00471	0	0	16.2206	43.9812	IL6
Measles	1/139	0.0673806	0.0989205	1.00471	0	0	15.9839	43.1149	IL6
Cell adhesion molecules	1/148	0.0715991	0.100823	0.996439	0	0	14.9985	39.5461	ICAM1
Phospholipase D signaling pathway	1/148	0.0715991	0.100823	0.996439	0	0	14.9985	39.5461	PDGFA
Non-alcoholic fatty liver disease	1/155	0.0748683	0.101923	0.991727	0	0	14.3117	37.0963	IL6
Cellular senescence	1/156	0.0753345	0.101923	0.991727	0	0	14.2186	36.7668	IL6
Hepatitis B	1/162	0.0781271	0.103669	0.984353	0	0	13.6846	34.8878	IL6
Tuberculosis	1/180	0.0864595	0.111065	0.954423	0	0	12.2973	30.1048	IL6
NOD-like receptor signaling pathway	1/181	0.0869204	0.111065	0.954423	0	0	12.2284	29.8711	IL6
Pathogenic Escherichia coli infection	1/197	0.0942667	0.118262	0.927155	0	0	11.2211	26.5	IL6
Focal adhesion	1/201	0.0960949	0.118403	0.926639	0	0	10.9944	25.7536	PDGFA
Rap1 signaling pathway	1/210	0.100196	0.12129	0.916174	0	0	10.5162	24.1939	PDGFA
Regulation of actin cytoskeleton	1/218	0.103828	0.123519	0.908265	0	0	10.1244	22.932	PDGFA
Human cytomegalovirus infection	1/225	0.106995	0.124598	0.90449	0	0	9.80456	21.913	IL6
Coronavirus disease	1/232	0.110152	0.124598	0.90449	0	0	9.50409	20.9651	IL6
Ras signaling pathway	1/232	0.110152	0.124598	0.90449	0	0	9.50409	20.9651	PDGFA
Calcium signaling pathway	1/240	0.113747	0.126589	0.897603	0	0	9.18224	19.9602	PDGFA
Salmonella infection	1/249	0.117776	0.128993	0.889434	0	0	8.84498	18.9191	IL6
Prion disease	1/273	0.12844	0.138475	0.85863	0	0	8.05474	16.5307	IL6
MAPK signaling pathway	1/294	0.137676	0.146148	0.835206	0	0	7.46947	14.8109	PDGFA
MicroRNAs in cancer	1/310	0.144654	0.151229	0.820365	0	0	7.07695	13.6827	PDGFA
Alzheimer disease	1/369	0.169946	0.175019	0.756914	0	0	5.92452	10.4999	IL6
Pathways of neurodegeneration	1/475	0.213702	0.216845	0.66385	0	0	4.57478	7.05966	IL6
Herpes simplex virus 1 infection	1/498	0.222918	0.222918	0.651855	0	0	4.35793	6.54103	IL6

## Sheet: Reactome
Term	Overlap	P-value	Adjusted P-value	#NAME?	Old P-value	Old Adjusted P-value	Odds Ratio	Combined Score	Genes
Interleukin-10 Signaling	1946-02-01	0.00023	0.0116779	1.93263	0	0	113.33	949.331	IL6;ICAM1
Chemokine Receptors Bind Chemokines	1957-02-01	0.000354	0.0116779	1.93263	0	0	90.6136	720.067	CCL27;CXCL5
Interleukin-4 and Interleukin-13 Signaling	2/112	0.00135819	0.0298802	1.52462	0	0	45.1818	298.272	IL6;ICAM1
Peptide Ligand-Binding Receptors	2/198	0.00416472	0.0402422	1.39532	0	0	25.2474	138.384	CCL27;CXCL5
MAPK1 (ERK2) Activation	2025-01-09	0.00449184	0.0402422	1.39532	0	0	277.528	1500.17	IL6
CD163 Mediating an Anti-Inflammatory Response	2025-01-09	0.00449184	0.0402422	1.39532	0	0	277.528	1500.17	IL6
MAPK3 (ERK1) Activation	2025-01-10	0.00498982	0.0402422	1.39532	0	0	246.679	1307.49	IL6
NFE2L2 Regulating Tumorigenic Genes	2025-01-11	0.00548757	0.0402422	1.39532	0	0	222	1155.57	PDGFA
Interleukin-6 Signaling	2025-01-11	0.00548757	0.0402422	1.39532	0	0	222	1155.57	IL6
MAPK1 MAPK3 Signaling	2/271	0.00766171	0.0492441	1.30765	0	0	18.3281	89.2855	IL6;PDGFA
Extracellular Matrix Organization	2/300	0.00932015	0.0492441	1.30765	0	0	16.5201	77.2412	PDGFA;ICAM1
MAPK Family Signaling Cascades	2/314	0.0101738	0.0492441	1.30765	0	0	15.7676	72.341	IL6;PDGFA
G Alpha (I) Signalling Events	2/316	0.0102985	0.0492441	1.30765	0	0	15.6656	71.682	CCL27;CXCL5
Class A 1 (Rhodopsin-like Receptors)	2/333	0.0113864	0.0492441	1.30765	0	0	14.8482	66.4506	CCL27;CXCL5
RAF-independent MAPK1 3 Activation	2025-01-23	0.0114431	0.0492441	1.30765	0	0	100.848	450.83	IL6
Interleukin-6 Family Signaling	2025-01-24	0.011938	0.0492441	1.30765	0	0	96.4589	427.123	IL6
Downstream Signal Transduction	2025-01-29	0.0144088	0.0559402	1.25228	0	0	79.2143	335.862	PDGFA
Transcriptional Regulation by VENTX	1941-01-01	0.0203163	0.0679658	1.16771	0	0	55.4167	215.922	IL6
Signaling by Interleukins	2/452	0.0203385	0.0679658	1.16771	0	0	10.8556	42.285	IL6;ICAM1
ADORA2B Mediated Anti-Inflammatory Cytokines Production	1943-01-01	0.0212978	0.0679658	1.16771	0	0	52.7725	203.129	IL6
GPCR Ligand Binding	2/467	0.0216255	0.0679658	1.16771	0	0	10.4973	40.2455	CCL27;CXCL5
Signaling by PDGF	1958-01-01	0.0286306	0.0835552	1.07803	0	0	38.8558	138.065	PDGFA
Non-integrin membrane-ECM Interactions	1959-01-01	0.0291177	0.0835552	1.07803	0	0	38.1839	135.034	PDGFA
Signal Transduction	2025-04-13	0.0317905	0.0874239	1.05837	0	0	4.44129	15.3162	IL6;PDGFA;CCL27;CXCL5
GPCR Downstream Signalling	2/633	0.03803	0.0971053	1.01276	0	0	7.66997	25.076	CCL27;CXCL5
Senescence-Associated Secretory Phenotype (SASP)	1981-01-01	0.0397784	0.0971053	1.01276	0	0	27.6528	89.1645	IL6
Constitutive Signaling by Aberrant PI3K in Cancer	1983-01-01	0.0407423	0.0971053	1.01276	0	0	26.9756	86.3351	PDGFA
Integrin Cell Surface Interactions	1985-01-01	0.0417053	0.0971053	1.01276	0	0	26.3307	83.6559	ICAM1
Nuclear Events Mediated by NFE2L2	1987-01-01	0.0426675	0.0971053	1.01276	0	0	25.7158	81.1157	PDGFA
Signaling by GPCR	2/706	0.0464012	0.10064	0.997229	0	0	6.84872	21.0285	CCL27;CXCL5
Interferon Gamma Signaling	1999-01-01	0.0484222	0.10064	0.997229	0	0	22.5533	68.2868	ICAM1
Post-translational Protein Phosphorylation	1/107	0.0522414	0.10064	0.997229	0	0	20.8428	61.5253	IL6
PI3K AKT Signaling in Cancer	1/110	0.0536701	0.10064	0.997229	0	0	20.2661	59.2762	PDGFA
PI5P, PP2A and IER3 Regulate PI3K AKT Signaling	1/111	0.0541458	0.10064	0.997229	0	0	20.0808	58.5571	PDGFA
Cytokine Signaling in Immune System	2/776	0.0550271	0.10064	0.997229	0	0	6.20672	17.999	IL6;ICAM1
Cellular Responses to Stress	2/787	0.0564331	0.10064	0.997229	0	0	6.11624	17.5824	IL6;PDGFA
Negative Regulation of the PI3K AKT Network	1/118	0.0574703	0.10064	0.997229	0	0	18.8727	53.9098	PDGFA
KEAP1-NFE2L2 Pathway	1/119	0.0579443	0.10064	0.997229	0	0	18.7119	53.2965	PDGFA
Regulation of IGF Transport and Uptake by Insulin-like Growth Factor Binding Proteins (IGFBPs)	1/124	0.0603114	0.102065	0.991121	0	0	17.9467	50.3985	IL6
Platelet Degranulation	1/128	0.0622012	0.102632	0.988717	0	0	17.378	48.2652	PDGFA
Response to Elevated Platelet Cytosolic Ca2+	1/133	0.0645587	0.103924	0.983285	0	0	16.7155	45.8035	PDGFA
Cellular Responses to Stimuli	2/887	0.0698057	0.109695	0.959815	0	0	5.39689	14.3667	IL6;PDGFA
Leishmania Parasite Growth and Survival	1/159	0.0767317	0.115098	0.938934	0	0	13.9466	35.8069	IL6
Anti-inflammatory Response Favouring Leishmania Parasite Infection	1/159	0.0767317	0.115098	0.938934	0	0	13.9466	35.8069	IL6
Cellular Senescence	1/167	0.0804485	0.117991	0.928151	0	0	13.2691	33.4399	IL6
Cellular Response to Chemical Stress	1/202	0.0965515	0.13853	0.858455	0	0	10.9392	25.5723	PDGFA
Immunoregulatory Interactions Between a Lymphoid and a non-Lymphoid Cell	1/223	0.106091	0.148979	0.826875	0	0	9.89389	22.1965	ICAM1
Leishmania Infection	1/245	0.115987	0.156228	0.806241	0	0	8.9918	19.3708	IL6
Parasitic Infection Pathways	1/245	0.115987	0.156228	0.806241	0	0	8.9918	19.3708	IL6
Platelet Activation, Signaling and Aggregation	1/262	0.123567	0.161633	0.791469	0	0	8.39889	17.5618	PDGFA
RAF MAP Kinase Cascade	1/265	0.124899	0.161633	0.791469	0	0	8.30219	17.2707	PDGFA
Interferon Signaling	1/280	0.131529	0.164339	0.78426	0	0	7.84986	15.9237	ICAM1
PIP3 Activates AKT Signaling	1/281	0.131969	0.164339	0.78426	0	0	7.82143	15.8399	PDGFA
Intracellular Signaling by Second Messengers	1/321	0.149421	0.182626	0.738438	0	0	6.82986	12.9835	PDGFA
Diseases of Signal Transduction by Growth Factor Receptors and Second Messengers	1/451	0.203981	0.244778	0.611228	0	0	4.82469	7.66994	PDGFA
Signaling by Receptor Tyrosine Kinases	1/536	0.237931	0.280419	0.552193	0	0	4.0405	5.80125	PDGFA
Disease	1931-02-01	0.289346	0.333466	0.476948	0	0	2.09735	2.60099	IL6;PDGFA
Immune System	1950-02-01	0.293046	0.333466	0.476948	0	0	2.07658	2.54885	IL6;ICAM1
Hemostasis	1/707	0.302311	0.338178	0.470855	0	0	3.03494	3.6307	PDGFA
Adaptive Immune System	1/854	0.353695	0.389065	0.409978	0	0	2.49277	2.59079	ICAM1
Generic Transcription Pathway	1/1230	0.469996	0.50852	0.293692	0	0	1.69614	1.28064	IL6
Infectious Disease	1/1311	0.492434	0.524204	0.2805	0	0	1.58439	1.12238	IL6
RNA Polymerase II Transcription	1/1360	0.505589	0.529664	0.275999	0	0	1.52326	1.03891	IL6
Post-translational Protein Modification	1/1457	0.530729	0.547314	0.261763	0	0	1.41438	0.896014	IL6
Gene Expression (Transcription)	1/1615	0.569224	0.577982	0.238086	0	0	1.26504	0.712827	IL6
Metabolism of Proteins	1967-01-01	0.664171	0.664171	0.17772	0	0	0.963967	0.39447	IL6

## Sheet: GO_BP
Term	Overlap	P-value	Adjusted P-value	#NAME?	Old P-value	Old Adjusted P-value	Odds Ratio	Combined Score	Genes
Cellular Response to Oxygen-Containing Compound (GO:1901701)	4/384	2.56e-05	0.00221579	2.65447	0	0	34.4035	363.696	IL6;CCL27;CXCL5;ICAM1
Cellular Response to Molecule of Bacterial Origin (GO:0071219)	3/123	2.64e-05	0.00221579	2.65447	0	0	70.9643	748.136	IL6;CCL27;CXCL5
Cellular Response to Lipopolysaccharide (GO:0071222)	3/125	2.77e-05	0.00221579	2.65447	0	0	69.7939	732.429	IL6;CCL27;CXCL5
Response to Lipopolysaccharide (GO:0032496)	3/161	5.89e-05	0.00353656	2.45142	0	0	53.7939	523.895	IL6;CCL27;CXCL5
Positive Regulation of Leukocyte Migration (GO:0002687)	2025-02-28	8.45e-05	0.00405422	2.39209	0	0	191.962	1800.45	IL6;ICAM1
Cellular Response to Lipid (GO:0071396)	3/234	0.000179	0.00602904	2.21975	0	0	36.6586	316.385	IL6;CCL27;CXCL5
Regulation of Peptidyl-Tyrosine Phosphorylation (GO:0050730)	1943-02-01	0.000201	0.00602904	2.21975	0	0	121.64	1035.45	IL6;PDGFA
Neutrophil Chemotaxis (GO:0030593)	1943-02-01	0.000201	0.00602904	2.21975	0	0	121.64	1035.45	CCL27;CXCL5
Inflammatory Response (GO:0006954)	3/261	0.000246	0.00653095	2.18502	0	0	32.7774	272.34	IL6;CCL27;CXCL5
Neutrophil Migration (GO:1990266)	1950-02-01	0.000272	0.00653095	2.18502	0	0	103.865	852.651	CCL27;CXCL5
Granulocyte Chemotaxis (GO:0071621)	1964-02-01	0.000446	0.0097346	2.01168	0	0	80.3548	619.923	CCL27;CXCL5
Positive Regulation of MAPK Cascade (GO:0043410)	3/362	0.000642	0.0128408	1.89141	0	0	23.4353	172.27	IL6;PDGFA;ICAM1
Antimicrobial Humoral Immune Response Mediated by Antimicrobial Peptide (GO:0061844)	2/116	0.00145584	0.0255226	1.59307	0	0	43.5877	284.723	CCL27;CXCL5
Positive Regulation of Cell Population Proliferation (GO:0008284)	3/484	0.00148882	0.0255226	1.59307	0	0	17.3825	113.156	IL6;PDGFA;CXCL5
Antimicrobial Humoral Response (GO:0019730)	2/147	0.00232292	0.0259296	1.5862	0	0	34.2155	207.515	CCL27;CXCL5
Regulation of Glucagon Secretion (GO:0070092)	2025-01-05	0.00249771	0.0259296	1.5862	0	0	555.167	3326.77	IL6
Negative Regulation of miRNA Processing (GO:1903799)	2025-01-05	0.00249771	0.0259296	1.5862	0	0	555.167	3326.77	IL6
Receptor-Mediated Virion Attachment to Host Cell (GO:0046813)	2025-01-05	0.00249771	0.0259296	1.5862	0	0	555.167	3326.77	ICAM1
Response to Peptidoglycan (GO:0032494)	2025-01-05	0.00249771	0.0259296	1.5862	0	0	555.167	3326.77	IL6
Inflammatory Response to Wounding (GO:0090594)	2025-01-05	0.00249771	0.0259296	1.5862	0	0	555.167	3326.77	IL6
Leukocyte Apoptotic Process (GO:0071887)	2025-01-05	0.00249771	0.0259296	1.5862	0	0	555.167	3326.77	IL6
Positive Regulation of ERK1 and ERK2 Cascade (GO:0070374)	2/153	0.00251307	0.0259296	1.5862	0	0	32.846	196.625	PDGFA;ICAM1
Positive Regulation of Gliogenesis (GO:0014015)	2025-01-06	0.00299658	0.0259296	1.5862	0	0	444.111	2580.41	IL6
Regulation of Interleukin-1-Mediated Signaling Pathway (GO:2000659)	2025-01-06	0.00299658	0.0259296	1.5862	0	0	444.111	2580.41	IL6
Positive Regulation of Cellular Process (GO:0048522)	3/622	0.00305035	0.0259296	1.5862	0	0	13.4117	77.6874	IL6;PDGFA;CXCL5
Positive Regulation of Protein Phosphorylation (GO:0001934)	2/171	0.00312629	0.0259296	1.5862	0	0	29.321	169.121	IL6;PDGFA
T Follicular Helper Cell Differentiation (GO:0061470)	2025-01-07	0.00349522	0.0259296	1.5862	0	0	370.074	2093.27	IL6
Positive Regulation of T-helper 2 Cell Cytokine Production (GO:2000553)	2025-01-07	0.00349522	0.0259296	1.5862	0	0	370.074	2093.27	IL6
Positive Regulation of Epithelial Cell Apoptotic Process (GO:1904037)	2025-01-07	0.00349522	0.0259296	1.5862	0	0	370.074	2093.27	IL6
Regulation of Cellular Extravasation (GO:0002691)	2025-01-07	0.00349522	0.0259296	1.5862	0	0	370.074	2093.27	ICAM1
Positive Regulation of Extracellular Matrix Disassembly (GO:0090091)	2025-01-07	0.00349522	0.0259296	1.5862	0	0	370.074	2093.27	IL6
Regulation of Glial Cell Proliferation (GO:0060251)	2025-01-08	0.00399365	0.0259296	1.5862	0	0	317.19	1751.86	IL6
Regulation of Cell Killing (GO:0031341)	2025-01-08	0.00399365	0.0259296	1.5862	0	0	317.19	1751.86	ICAM1
Positive Regulation of Mesenchymal Cell Proliferation (GO:0002053)	2025-01-09	0.00449184	0.0259296	1.5862	0	0	277.528	1500.17	PDGFA
Regulation of Leukocyte Mediated Cytotoxicity (GO:0001910)	2025-01-09	0.00449184	0.0259296	1.5862	0	0	277.528	1500.17	ICAM1
T-helper 17 Cell Lineage Commitment (GO:0072540)	2025-01-09	0.00449184	0.0259296	1.5862	0	0	277.528	1500.17	IL6
Positive Regulation of Protein Autophosphorylation (GO:0031954)	2025-01-09	0.00449184	0.0259296	1.5862	0	0	277.528	1500.17	PDGFA
Myeloid Leukocyte Mediated Immunity (GO:0002444)	2025-01-09	0.00449184	0.0259296	1.5862	0	0	277.528	1500.17	IL6
Negative Regulation of Bone Resorption (GO:0045779)	2025-01-09	0.00449184	0.0259296	1.5862	0	0	277.528	1500.17	IL6
Negative Regulation of Lipid Localization (GO:1905953)	2025-01-10	0.00498982	0.0259296	1.5862	0	0	246.679	1307.49	IL6
T-helper 17 Cell Differentiation (GO:0072539)	2025-01-10	0.00498982	0.0259296	1.5862	0	0	246.679	1307.49	IL6
Response to Corticosteroid (GO:0031960)	2025-01-10	0.00498982	0.0259296	1.5862	0	0	246.679	1307.49	IL6
Regulation of T-helper 2 Cell Cytokine Production (GO:2000551)	2025-01-10	0.00498982	0.0259296	1.5862	0	0	246.679	1307.49	IL6
Regulation of ERK1 and ERK2 Cascade (GO:0070372)	2/223	0.00525067	0.0259296	1.5862	0	0	22.3631	117.393	PDGFA;ICAM1
Positive Regulation of Platelet Aggregation (GO:1901731)	2025-01-11	0.00548757	0.0259296	1.5862	0	0	222	1155.57	IL6
Regulation of Mesenchymal Cell Proliferation (GO:0010464)	2025-01-11	0.00548757	0.0259296	1.5862	0	0	222	1155.57	PDGFA
Regulation of Cell Activation (GO:0050865)	2025-01-11	0.00548757	0.0259296	1.5862	0	0	222	1155.57	IL6
Negative Regulation of Bone Remodeling (GO:0046851)	2025-01-11	0.00548757	0.0259296	1.5862	0	0	222	1155.57	IL6
Regulation of Cell Population Proliferation (GO:0042127)	3/769	0.00554807	0.0259296	1.5862	0	0	10.7557	55.8683	IL6;PDGFA;CXCL5
Positive Regulation of Neuroinflammatory Response (GO:0150078)	2025-01-12	0.00598509	0.0259296	1.5862	0	0	201.808	1032.95	IL6
Regulation of Leukocyte Adhesion to Vascular Endothelial Cell (GO:1904994)	2025-01-12	0.00598509	0.0259296	1.5862	0	0	201.808	1032.95	IL6
T-helper Cell Lineage Commitment (GO:0002295)	2025-01-12	0.00598509	0.0259296	1.5862	0	0	201.808	1032.95	IL6
Regulation of Astrocyte Differentiation (GO:0048710)	2025-01-12	0.00598509	0.0259296	1.5862	0	0	201.808	1032.95	IL6
Interleukin-6-Mediated Signaling Pathway (GO:0070102)	2025-01-12	0.00598509	0.0259296	1.5862	0	0	201.808	1032.95	IL6
Positive Regulation of Cellular Extravasation (GO:0002693)	2025-01-12	0.00598509	0.0259296	1.5862	0	0	201.808	1032.95	ICAM1
Cell Projection Assembly (GO:0030031)	2025-01-13	0.0064824	0.0259296	1.5862	0	0	184.981	932.06	PDGFA
Mature B Cell Differentiation Involved in Immune Response (GO:0002313)	2025-01-13	0.0064824	0.0259296	1.5862	0	0	184.981	932.06	IL6
Positive Regulation of Type 2 Immune Response (GO:0002830)	2025-01-13	0.0064824	0.0259296	1.5862	0	0	184.981	932.06	IL6
Regulation of Protein Autophosphorylation (GO:0031952)	2025-01-13	0.0064824	0.0259296	1.5862	0	0	184.981	932.06	PDGFA
Negative Regulation of Cell Activation (GO:0050866)	2025-01-13	0.0064824	0.0259296	1.5862	0	0	184.981	932.06	PDGFA
Regulation of Extracellular Matrix Disassembly (GO:0010715)	2025-01-14	0.00697947	0.0261119	1.58316	0	0	170.744	847.705	IL6
Acute-Phase Response (GO:0006953)	2025-01-14	0.00697947	0.0261119	1.58316	0	0	170.744	847.705	IL6
Positive Regulation of Acute Inflammatory Response (GO:0002675)	2025-01-14	0.00697947	0.0261119	1.58316	0	0	170.744	847.705	IL6
Neutrophil Mediated Immunity (GO:0002446)	2025-01-14	0.00697947	0.0261119	1.58316	0	0	170.744	847.705	IL6
Regulation of MAPK Cascade (GO:0043408)	2/260	0.00707198	0.0261119	1.58316	0	0	19.1202	94.6756	IL6;PDGFA
Regulation of Microglial Cell Activation (GO:1903978)	2025-01-15	0.00747633	0.0271866	1.56564	0	0	158.54	776.212	IL6
Negative Regulation of Platelet Activation (GO:0010544)	2025-01-16	0.00797296	0.0285599	1.54424	0	0	147.963	714.913	PDGFA
Positive Regulation of Leukocyte Adhesion to Vascular Endothelial Cell (GO:1904996)	2025-01-17	0.00846937	0.0286288	1.5432	0	0	138.708	661.819	IL6
Platelet-Derived Growth Factor Receptor Signaling Pathway (GO:0048008)	2025-01-17	0.00846937	0.0286288	1.5432	0	0	138.708	661.819	PDGFA
Regulation of Leukocyte Chemotaxis (GO:0002688)	2025-01-17	0.00846937	0.0286288	1.5432	0	0	138.708	661.819	IL6
Negative Regulation of Chemokine Production (GO:0032682)	2025-01-17	0.00846937	0.0286288	1.5432	0	0	138.708	661.819	IL6
Positive Regulation of Homotypic Cell-Cell Adhesion (GO:0034112)	2025-01-18	0.00896555	0.0286898	1.54227	0	0	130.542	615.425	IL6
Negative Regulation of Nervous System Development (GO:0051961)	2025-01-18	0.00896555	0.0286898	1.54227	0	0	130.542	615.425	IL6
Regulation of Acute Inflammatory Response (GO:0002673)	2025-01-18	0.00896555	0.0286898	1.54227	0	0	130.542	615.425	IL6
Positive Regulation of Cytokine Production Involved in Inflammatory Response (GO:1900017)	2025-01-18	0.00896555	0.0286898	1.54227	0	0	130.542	615.425	IL6
Regulation of Receptor Signaling Pathway via STAT (GO:1904892)	2025-01-19	0.00946151	0.0287438	1.54146	0	0	123.284	574.568	IL6
Regulation of Smooth Muscle Cell Migration (GO:0014910)	2025-01-19	0.00946151	0.0287438	1.54146	0	0	123.284	574.568	PDGFA
Cell Projection Organization (GO:0030030)	2025-01-19	0.00946151	0.0287438	1.54146	0	0	123.284	574.568	PDGFA
Negative Regulation of Lipid Storage (GO:0010888)	2025-01-19	0.00946151	0.0287438	1.54146	0	0	123.284	574.568	IL6
Regulation of Collagen Biosynthetic Process (GO:0032965)	2025-01-20	0.00995725	0.0298717	1.52474	0	0	116.789	538.336	IL6
Regulation of Neuroinflammatory Response (GO:0150077)	2025-01-21	0.0104528	0.0305934	1.51437	0	0	110.944	506.005	IL6
Positive Regulation of Extracellular Matrix Organization (GO:1903055)	2025-01-21	0.0104528	0.0305934	1.51437	0	0	110.944	506.005	IL6
Negative Regulation of Cell Development (GO:0010721)	2025-01-22	0.0109481	0.0314086	1.50295	0	0	105.656	476.994	IL6
Cellular Response to Interleukin-6 (GO:0071354)	2025-01-23	0.0114431	0.0314086	1.50295	0	0	100.848	450.83	IL6
T-helper Cell Differentiation (GO:0042093)	2025-01-23	0.0114431	0.0314086	1.50295	0	0	100.848	450.83	IL6
Positive Regulation of T Cell Cytokine Production (GO:0002726)	2025-01-23	0.0114431	0.0314086	1.50295	0	0	100.848	450.83	IL6
Monocyte Chemotaxis (GO:0002548)	2025-01-23	0.0114431	0.0314086	1.50295	0	0	100.848	450.83	IL6
Endothelial Cell Development (GO:0001885)	2025-01-24	0.011938	0.0314086	1.50295	0	0	96.4589	427.123	ICAM1
Negative Regulation of Extrinsic Apoptotic Signaling Pathway via Death Domain Receptors (GO:1902042)	2025-01-24	0.011938	0.0314086	1.50295	0	0	96.4589	427.123	ICAM1
Regulation of Lipid Storage (GO:0010883)	2025-01-24	0.011938	0.0314086	1.50295	0	0	96.4589	427.123	IL6
Acute Inflammatory Response (GO:0002526)	2025-01-24	0.011938	0.0314086	1.50295	0	0	96.4589	427.123	IL6
Positive Regulation of Interleukin-17 Production (GO:0032740)	2025-01-25	0.0124326	0.0314086	1.50295	0	0	92.4352	405.553	IL6
Regulation of B Cell Activation (GO:0050864)	2025-01-25	0.0124326	0.0314086	1.50295	0	0	92.4352	405.553	IL6
Response to Glucocorticoid (GO:0051384)	2025-01-25	0.0124326	0.0314086	1.50295	0	0	92.4352	405.553	IL6
Negative Chemotaxis (GO:0050919)	2025-01-25	0.0124326	0.0314086	1.50295	0	0	92.4352	405.553	PDGFA
Negative Regulation of Endothelial Cell Apoptotic Process (GO:2000352)	2025-01-26	0.012927	0.0319843	1.49506	0	0	88.7333	385.851	ICAM1
Regulation of Platelet Aggregation (GO:0090330)	2025-01-26	0.012927	0.0319843	1.49506	0	0	88.7333	385.851	IL6
Peptide Hormone Secretion (GO:0030072)	2025-01-27	0.0134212	0.0322108	1.492	0	0	85.3162	367.792	IL6
Negative Regulation of Neurogenesis (GO:0050768)	2025-01-27	0.0134212	0.0322108	1.492	0	0	85.3162	367.792	IL6
Positive Regulation of Vascular Endothelial Growth Factor Production (GO:0010575)	2025-01-27	0.0134212	0.0322108	1.492	0	0	85.3162	367.792	IL6
Establishment of Endothelial Barrier (GO:0061028)	2025-01-28	0.0139151	0.0324119	1.4893	0	0	82.1523	351.183	ICAM1
Regulation of DNA Biosynthetic Process (GO:2000278)	2025-01-28	0.0139151	0.0324119	1.4893	0	0	82.1523	351.183	PDGFA
Positive Regulation of Fibroblast Proliferation (GO:0048146)	2025-01-28	0.0139151	0.0324119	1.4893	0	0	82.1523	351.183	PDGFA
Maintenance of Blood-Brain Barrier (GO:0035633)	2025-01-29	0.0144088	0.0324119	1.4893	0	0	79.2143	335.862	IL6
Regulation of Vascular Endothelial Growth Factor Production (GO:0010574)	2025-01-29	0.0144088	0.0324119	1.4893	0	0	79.2143	335.862	IL6
Regulation of Platelet Activation (GO:0010543)	2025-01-29	0.0144088	0.0324119	1.4893	0	0	79.2143	335.862	PDGFA
Positive Regulation of Interleukin-10 Production (GO:0032733)	2025-01-30	0.0149024	0.0324119	1.4893	0	0	76.4789	321.688	IL6
T Cell Activation Involved in Immune Response (GO:0002286)	2025-01-30	0.0149024	0.0324119	1.4893	0	0	76.4789	321.688	ICAM1
Positive Regulation of Peptidyl-Serine Phosphorylation (GO:0033138)	2025-01-30	0.0149024	0.0324119	1.4893	0	0	76.4789	321.688	IL6
Regulation of Bone Resorption (GO:0045124)	2025-01-30	0.0149024	0.0324119	1.4893	0	0	76.4789	321.688	IL6
Regulation of Immunoglobulin Production (GO:0002637)	2025-01-31	0.0153956	0.0324119	1.4893	0	0	73.9259	308.542	IL6
Regulation of Macrophage Activation (GO:0043030)	2025-01-31	0.0153956	0.0324119	1.4893	0	0	73.9259	308.542	IL6
Negative Regulation of Blood Coagulation (GO:0030195)	2025-01-31	0.0153956	0.0324119	1.4893	0	0	73.9259	308.542	PDGFA
Leukocyte Cell-Cell Adhesion (GO:0007159)	2025-01-31	0.0153956	0.0324119	1.4893	0	0	73.9259	308.542	ICAM1
Negative Regulation of Fat Cell Differentiation (GO:0045599)	1932-01-01	0.0158887	0.0328732	1.48316	0	0	71.5376	296.319	IL6
Regulation of Extrinsic Apoptotic Signaling Pathway via Death Domain Receptors (GO:1902041)	1932-01-01	0.0158887	0.0328732	1.48316	0	0	71.5376	296.319	ICAM1
Liver Development (GO:0001889)	1934-01-01	0.0168742	0.0346137	1.46075	0	0	67.1953	274.289	IL6
Cellular Response to Hydrogen Peroxide (GO:0070301)	1935-01-01	0.0173666	0.0347331	1.45926	0	0	65.2157	264.333	IL6
Regulation of Vasculature Development (GO:1901342)	1935-01-01	0.0173666	0.0347331	1.45926	0	0	65.2157	264.333	IL6
Regulation of Interleukin-17 Production (GO:0032660)	1935-01-01	0.0173666	0.0347331	1.45926	0	0	65.2157	264.333	IL6
Cellular Response to Amyloid-Beta (GO:1904646)	1936-01-01	0.0178587	0.0354223	1.45072	0	0	63.3492	254.997	ICAM1
Positive Regulation of Immunoglobulin Production (GO:0002639)	1938-01-01	0.0188424	0.0364692	1.43807	0	0	59.9189	237.977	IL6
Positive Regulation of Receptor Signaling Pathway via JAK-STAT (GO:0046427)	1938-01-01	0.0188424	0.0364692	1.43807	0	0	59.9189	237.977	IL6
Regulation of Peptidyl-Serine Phosphorylation (GO:0033135)	1938-01-01	0.0188424	0.0364692	1.43807	0	0	59.9189	237.977	IL6
Response to Hydrogen Peroxide (GO:0042542)	1942-01-01	0.0208071	0.0393206	1.40538	0	0	54.0623	209.354	IL6
Heterophilic Cell-Cell Adhesion via Plasma Membrane Cell Adhesion Molecules (GO:0007157)	1942-01-01	0.0208071	0.0393206	1.40538	0	0	54.0623	209.354	ICAM1
Positive Regulation of Receptor Signaling Pathway via STAT (GO:1904894)	1942-01-01	0.0208071	0.0393206	1.40538	0	0	54.0623	209.354	IL6
Positive Regulation of Production of Molecular Mediator of Immune Response (GO:0002702)	1943-01-01	0.0212978	0.0396237	1.40204	0	0	52.7725	203.129	IL6
Regulation of Chemokine Production (GO:0032642)	1943-01-01	0.0212978	0.0396237	1.40204	0	0	52.7725	203.129	IL6
Response to Amyloid-Beta (GO:1904645)	1945-01-01	0.0222784	0.0404488	1.39309	0	0	50.3687	191.61	ICAM1
Negative Regulation of Biosynthetic Process (GO:0009890)	1945-01-01	0.0222784	0.0404488	1.39309	0	0	50.3687	191.61	IL6
Negative Regulation of Apoptotic Process (GO:0043066)	2/475	0.0223258	0.0404488	1.39309	0	0	10.3155	39.2198	IL6;ICAM1
Regulation of Fibroblast Proliferation (GO:0048145)	1946-01-01	0.0227683	0.0404488	1.39309	0	0	49.2469	186.271	PDGFA
Regulation of Interleukin-10 Production (GO:0032653)	1946-01-01	0.0227683	0.0404488	1.39309	0	0	49.2469	186.271	IL6
Positive Regulation of Chemotaxis (GO:0050921)	1946-01-01	0.0227683	0.0404488	1.39309	0	0	49.2469	186.271	IL6
Regulation of Endothelial Cell Apoptotic Process (GO:2000351)	1947-01-01	0.0232581	0.0404488	1.39309	0	0	48.1739	181.187	ICAM1
Cell Surface Receptor Signaling Pathway via JAK-STAT (GO:0007259)	1947-01-01	0.0232581	0.0404488	1.39309	0	0	48.1739	181.187	IL6
Positive Regulation of miRNA Transcription (GO:1902895)	1947-01-01	0.0232581	0.0404488	1.39309	0	0	48.1739	181.187	IL6
Positive Regulation of Leukocyte Cell-Cell Adhesion (GO:1903039)	1948-01-01	0.0237476	0.0407101	1.3903	0	0	47.1466	176.341	IL6
Positive Regulation of Osteoblast Differentiation (GO:0045669)	1948-01-01	0.0237476	0.0407101	1.3903	0	0	47.1466	176.341	IL6
Positive Regulation of Smooth Muscle Cell Proliferation (GO:0048661)	1949-01-01	0.0242369	0.0409637	1.3876	0	0	46.162	171.717	IL6
Positive Regulation of Epithelial to Mesenchymal Transition (GO:0010718)	1949-01-01	0.0242369	0.0409637	1.3876	0	0	46.162	171.717	IL6
Positive Regulation of Lymphocyte Activation (GO:0051251)	1950-01-01	0.0247259	0.0414981	1.38197	0	0	45.2177	167.301	IL6
Positive Regulation of miRNA Metabolic Process (GO:2000630)	1953-01-01	0.0261919	0.043181	1.36471	0	0	42.6026	155.172	IL6
Positive Regulation of B Cell Activation (GO:0050871)	1953-01-01	0.0261919	0.043181	1.36471	0	0	42.6026	155.172	IL6
Regulation of Smooth Muscle Cell Proliferation (GO:0048660)	1954-01-01	0.0266801	0.043181	1.36471	0	0	41.7966	151.464	IL6
Positive Regulation of Chemokine Production (GO:0032722)	1954-01-01	0.0266801	0.043181	1.36471	0	0	41.7966	151.464	IL6
Regulation of Receptor Signaling Pathway via JAK-STAT (GO:0046425)	1955-01-01	0.027168	0.043181	1.36471	0	0	41.0206	147.908	IL6
Regulation of Cytokine Production Involved in Inflammatory Response (GO:1900015)	1955-01-01	0.027168	0.043181	1.36471	0	0	41.0206	147.908	IL6
Cell Surface Receptor Signaling Pathway via STAT (GO:0097696)	1955-01-01	0.027168	0.043181	1.36471	0	0	41.0206	147.908	IL6
Regulation of Peptide Hormone Secretion (GO:0090276)	1955-01-01	0.027168	0.043181	1.36471	0	0	41.0206	147.908	IL6
Positive Regulation of Interleukin-1 Beta Production (GO:0032731)	1956-01-01	0.0276558	0.0433816	1.36269	0	0	40.2727	144.495	IL6
Positive Regulation of Leukocyte Chemotaxis (GO:0002690)	1956-01-01	0.0276558	0.0433816	1.36269	0	0	40.2727	144.495	IL6
Positive Regulation of Interleukin-1 Production (GO:0032732)	1963-01-01	0.0310639	0.0477906	1.32066	0	0	35.7133	123.986	IL6
Positive Regulation of Interleukin-8 Production (GO:0032757)	1963-01-01	0.0310639	0.0477906	1.32066	0	0	35.7133	123.986	IL6
Positive Regulation of Peptidyl-Tyrosine Phosphorylation (GO:0050731)	1963-01-01	0.0310639	0.0477906	1.32066	0	0	35.7133	123.986	IL6
Cellular Response to Virus (GO:0098586)	1965-01-01	0.0320357	0.0484789	1.31445	0	0	34.5938	119.034	IL6
Positive Regulation of T Cell Proliferation (GO:0042102)	1965-01-01	0.0320357	0.0484789	1.31445	0	0	34.5938	119.034	IL6
Positive Regulation of MAP Kinase Activity (GO:0043406)	1966-01-01	0.0325213	0.0484789	1.31445	0	0	34.0598	116.684	PDGFA
Regulation of miRNA Transcription (GO:1902893)	1966-01-01	0.0325213	0.0484789	1.31445	0	0	34.0598	116.684	IL6
Regulation of Neurogenesis (GO:0050767)	1966-01-01	0.0325213	0.0484789	1.31445	0	0	34.0598	116.684	IL6
Negative Regulation of Cytokine-Mediated Signaling Pathway (GO:0001960)	1967-01-01	0.0330066	0.0485987	1.31338	0	0	33.5421	114.414	IL6
Response to Molecule of Bacterial Origin (GO:0002237)	1967-01-01	0.0330066	0.0485987	1.31338	0	0	33.5421	114.414	IL6
Skin Development (GO:0043588)	1969-01-01	0.0339766	0.0497219	1.30345	0	0	32.5523	110.095	PDGFA
Cellular Response to Reactive Oxygen Species (GO:0034614)	1971-01-01	0.0349458	0.0508302	1.29388	0	0	31.619	106.049	IL6
Negative Regulation of Extrinsic Apoptotic Signaling Pathway (GO:2001237)	1972-01-01	0.03543	0.0512241	1.29053	0	0	31.1721	104.121	ICAM1
Regulation of MAP Kinase Activity (GO:0043405)	1973-01-01	0.035914	0.0513058	1.28983	0	0	30.7377	102.253	PDGFA
Embryonic Organ Development (GO:0048568)	1973-01-01	0.035914	0.0513058	1.28983	0	0	30.7377	102.253	PDGFA
Regulation of Fat Cell Differentiation (GO:0045598)	1975-01-01	0.0368814	0.0520679	1.28343	0	0	29.9039	98.6843	IL6
Positive Regulation of Protein Serine/Threonine Kinase Activity (GO:0071902)	1975-01-01	0.0368814	0.0520679	1.28343	0	0	29.9039	98.6843	PDGFA
Positive Regulation of Interleukin-6 Production (GO:0032755)	1977-01-01	0.0378479	0.0528111	1.27727	0	0	29.114	95.3245	IL6
Positive Regulation of Lymphocyte Proliferation (GO:0050671)	1977-01-01	0.0378479	0.0528111	1.27727	0	0	29.114	95.3245	IL6
Wound Healing (GO:0042060)	1981-01-01	0.0397784	0.0549006	1.26042	0	0	27.6528	89.1645	PDGFA
Positive Regulation of Intracellular Signal Transduction (GO:1902533)	2/652	0.0401448	0.0549006	1.26042	0	0	7.43846	23.9166	IL6;PDGFA
Regulation of Interleukin-1 Beta Production (GO:0032651)	1982-01-01	0.0402604	0.0549006	1.26042	0	0	27.31	87.7303	IL6
Positive Regulation of Tumor Necrosis Factor Production (GO:0032760)	1982-01-01	0.0402604	0.0549006	1.26042	0	0	27.31	87.7303	IL6
Regulation of Interleukin-8 Production (GO:0032677)	1983-01-01	0.0407423	0.0549334	1.26016	0	0	26.9756	86.3351	IL6
Regulation of T Cell Proliferation (GO:0042129)	1983-01-01	0.0407423	0.0549334	1.26016	0	0	26.9756	86.3351	IL6
Positive Regulation of Tumor Necrosis Factor Superfamily Cytokine Production (GO:1903557)	1985-01-01	0.0417053	0.0559177	1.25245	0	0	26.3307	83.6559	IL6
Defense Response to Gram-negative Bacterium (GO:0050829)	1987-01-01	0.0426675	0.05689	1.24496	0	0	25.7158	81.1157	IL6
Regulation of Epithelial to Mesenchymal Transition (GO:0010717)	1991-01-01	0.0445892	0.059107	1.22836	0	0	24.5679	76.4126	IL6
Glucose Homeostasis (GO:0042593)	1992-01-01	0.0450691	0.059107	1.22836	0	0	24.2967	75.3091	IL6
Regulation of Osteoblast Differentiation (GO:0045667)	1992-01-01	0.0450691	0.059107	1.22836	0	0	24.2967	75.3091	IL6
Regulation of Insulin Secretion (GO:0050796)	1993-01-01	0.0455488	0.0594114	1.22613	0	0	24.0314	74.2323	IL6
Regulation of Actin Filament-Based Process (GO:0032970)	1996-01-01	0.0469865	0.0609554	1.21499	0	0	23.269	71.1542	PDGFA
Defense Response to Gram-positive Bacterium (GO:0050830)	1998-01-01	0.0479439	0.0618631	1.20857	0	0	22.7869	69.2204	IL6
Regulation of Protein Secretion (GO:0050708)	1999-01-01	0.0484222	0.0621462	1.20659	0	0	22.5533	68.2868	IL6
Regulation of Actin Cytoskeleton Organization (GO:0032956)	1/104	0.0508108	0.0648649	1.18799	0	0	21.4531	63.9226	PDGFA
Positive Regulation of Translation (GO:0045727)	1/108	0.0527178	0.0669433	1.17429	0	0	20.6469	60.7598	IL6
Positive Regulation of T Cell Activation (GO:0050870)	1/111	0.0541458	0.0683947	1.16498	0	0	20.0808	58.5571	IL6
Regulation of Interleukin-6 Production (GO:0032675)	1/114	0.0555719	0.0698286	1.15597	0	0	19.5447	56.4858	IL6
Positive Regulation of Inflammatory Response (GO:0050729)	1/115	0.0560468	0.0700585	1.15454	0	0	19.3723	55.8227	IL6
Regulation of DNA Metabolic Process (GO:0051052)	1/116	0.0565215	0.0702858	1.15313	0	0	19.2029	55.1725	PDGFA
Regulation of Anatomical Structure Morphogenesis (GO:0022603)	1/127	0.0617291	0.0763659	1.1171	0	0	17.5168	48.7842	IL6
Regulation of Tumor Necrosis Factor Production (GO:0032680)	1/131	0.0636164	0.0782971	1.10625	0	0	16.9744	46.7624	IL6
Regulation of Protein Phosphorylation (GO:0001932)	1/137	0.0664408	0.0813561	1.08961	0	0	16.2206	43.9812	PDGFA
Regulation of Cytoskeleton Organization (GO:0051493)	1/139	0.0673806	0.082088	1.08572	0	0	15.9839	43.1149	PDGFA
Plasma Membrane Bounded Cell Projection Organization (GO:0120036)	1/141	0.0683195	0.0828116	1.08191	0	0	15.754	42.2767	IL6
Neuron Development (GO:0048666)	1/159	0.0767317	0.0925408	1.03367	0	0	13.9466	35.8069	IL6
+ Reg of Phosphatidylinositol 3-Kinase/Prot Kinase B Signal Transduction (GO:0051897)	1/162	0.0781271	0.0937525	1.02802	0	0	13.6846	34.8878	PDGFA
Cellular Response to Nitrogen Compound (GO:1901699)	1/169	0.0813756	0.0971648	1.01249	0	0	13.1098	32.8883	ICAM1
Regulation of Macromolecule Biosynthetic Process (GO:0010556)	1/170	0.0818388	0.0972342	1.01218	0	0	13.0316	32.618	PDGFA
Cell-Cell Adhesion via Plasma-Membrane Adhesion Molecules (GO:0098742)	1/171	0.0823018	0.0973026	1.01188	0	0	12.9542	32.3515	ICAM1
Regulation of Cytokine Production (GO:0001817)	1/172	0.0827646	0.0973701	1.01157	0	0	12.8778	32.0884	IL6
Positive Regulation of DNA-binding Transcription Factor Activity (GO:0051091)	1/174	0.0836896	0.097978	1.00887	0	0	12.7277	31.5728	IL6
Negative Regulation of Cytokine Production (GO:0001818)	1/191	0.0915181	0.106623	0.972149	0	0	11.5789	27.6878	IL6
Defense Response to Virus (GO:0051607)	1/198	0.0947241	0.109825	0.959299	0	0	11.1636	26.3101	IL6
Regulation of Translation (GO:0006417)	1/201	0.0960949	0.110872	0.955176	0	0	10.9944	25.7536	IL6
Positive Regulation of Protein Metabolic Process (GO:0051247)	1/202	0.0965515	0.110872	0.955176	0	0	10.9392	25.5723	IL6
Neuron Projection Development (GO:0031175)	1/206	0.0983755	0.112429	0.949121	0	0	10.7236	24.8676	IL6
Regulation of Angiogenesis (GO:0045765)	1/211	0.100651	0.114485	0.941253	0	0	10.4656	24.03	IL6
Regulation of Phosphatidylinositol 3-Kinase/Protein Kinase B Signal Transduction (GO:0051896)	1/219	0.104281	0.117966	0.928243	0	0	10.0775	22.7818	PDGFA
Negative Regulation of Cell Differentiation (GO:0045596)	1/220	0.104734	0.117966	0.928243	0	0	10.0309	22.6332	IL6
Defense Response to Bacterium (GO:0042742)	1/221	0.105186	0.117966	0.928243	0	0	9.98485	22.4861	IL6
Positive Regulation of Programmed Cell Death (GO:0043068)	1/248	0.117329	0.130259	0.885191	0	0	8.88124	19.0305	IL6
Regulation of Inflammatory Response (GO:0050727)	1/249	0.117776	0.130259	0.885191	0	0	8.84498	18.9191	IL6
Positive Regulation of Cell Motility (GO:2000147)	1/249	0.117776	0.130259	0.885191	0	0	8.84498	18.9191	PDGFA
Cytokine-Mediated Signaling Pathway (GO:0019221)	1/255	0.120453	0.132492	0.877812	0	0	8.63342	18.2726	IL6
Positive Regulation of Signal Transduction (GO:0009967)	1/256	0.120899	0.132492	0.877812	0	0	8.59913	18.1683	IL6
Cellular Component Assembly (GO:0022607)	1/277	0.130206	0.142043	0.847579	0	0	7.93639	16.1794	PDGFA
Cellular Response to Cytokine Stimulus (GO:0071345)	1/289	0.135485	0.147133	0.832289	0	0	7.60108	15.1937	IL6
Cell Surface Receptor Protein Tyrosine Kinase Signaling Pathway (GO:0007169)	1/296	0.138551	0.149584	0.825115	0	0	7.41808	14.662	PDGFA
Positive Regulation of Cell Differentiation (GO:0045597)	1/297	0.138988	0.149584	0.825115	0	0	7.39264	14.5884	IL6
Positive Regulation of Apoptotic Process (GO:0043065)	1/313	0.145956	0.156382	0.805814	0	0	7.00783	13.4862	IL6
Positive Regulation of Cytokine Production (GO:0001819)	1/325	0.151149	0.161226	0.792566	0	0	6.74417	12.743	IL6
Positive Regulation of Cell Migration (GO:0030335)	1/344	0.159313	0.169181	0.771647	0	0	6.36443	11.6907	PDGFA
Positive Regulation of Macromolecule Biosynthetic Process (GO:0010557)	1/355	0.164006	0.173399	0.760954	0	0	6.16321	11.1422	IL6
Negative Regulation of Cell Population Proliferation (GO:0008285)	1/379	0.174166	0.183333	0.73676	0	0	5.76484	10.0755	IL6
Negative Regulation of Programmed Cell Death (GO:0043069)	1/382	0.175428	0.183855	0.735525	0	0	5.71858	9.95333	IL6
Positive Regulation of Multicellular Organismal Process (GO:0051240)	1/407	0.185878	0.19396	0.712288	0	0	5.35961	9.01841	IL6
Positive Regulation of Gene Expression (GO:0010628)	1/436	0.197851	0.20556	0.687062	0	0	4.99489	8.09293	IL6
Regulation of Cell Migration (GO:0030334)	1/479	0.215312	0.222737	0.652208	0	0	4.53556	6.96511	PDGFA
Negative Regulation of Cellular Process (GO:0048523)	1/531	0.235971	0.24306	0.614287	0	0	4.07966	5.89123	IL6
Positive Regulation of RNA Biosynthetic Process (GO:1902680)	1/555	0.245339	0.25163	0.599238	0	0	3.89811	5.4773	IL6
Regulation of Apoptotic Process (GO:0042981)	1/704	0.301225	0.307634	0.511966	0	0	3.04836	3.65773	IL6
Positive Regulation of Transcription by RNA Polymerase II (GO:0045944)	1/983	0.395954	0.402665	0.395056	0	0	2.15071	1.99254	IL6
Regulation of Gene Expression (GO:0010468)	1/1127	0.440176	0.445748	0.350911	0	0	1.86146	1.52748	IL6
Positive Regulation of DNA-templated Transcription (GO:0045893)	1/1274	0.482293	0.486346	0.313055	0	0	1.63367	1.19128	IL6
Regulation of DNA-templated Transcription (GO:0006355)	1939-01-01	0.677417	0.680251	0.167331	0	0	0.927762	0.361334	IL6
Regulation of Transcription by RNA Polymerase II (GO:0006357)	1950-01-01	0.696917	0.696917	0.156819	0	0	0.876488	0.31649	IL6

## Sheet: GO_MF
Term	Overlap	P-value	Adjusted P-value	#NAME?	Old P-value	Old Adjusted P-value	Odds Ratio	Combined Score	Genes
Cytokine Activity (GO:0005125)	3/186	9.05e-05	0.00107409	2.96896	0	0	46.3864	431.856	IL6;CCL27;CXCL5
Chemokine Activity (GO:0008009)	1942-02-01	0.000192	0.00107409	2.96896	0	0	124.688	1067.29	CCL27;CXCL5
Chemokine Receptor Binding (GO:0042379)	1946-02-01	0.00023	0.00107409	2.96896	0	0	113.33	949.331	CCL27;CXCL5
Growth Factor Activity (GO:0008083)	1992-02-01	0.00092	0.00303811	2.5174	0	0	55.2778	386.483	IL6;PDGFA
Growth Factor Receptor Binding (GO:0070851)	2/100	0.00108504	0.00303811	2.5174	0	0	50.7449	346.392	IL6;PDGFA
Interleukin-6 Receptor Binding (GO:0005138)	2025-01-06	0.00299658	0.00699202	2.1554	0	0	444.111	2580.41	IL6
Platelet-Derived Growth Factor Binding (GO:0048407)	2025-01-10	0.00498982	0.00997964	2.00089	0	0	246.679	1307.49	PDGFA
Platelet-Derived Growth Factor Receptor Binding (GO:0005161)	2025-01-12	0.00598509	0.0104739	1.97989	0	0	201.808	1032.95	PDGFA
CXCR Chemokine Receptor Binding (GO:0045236)	2025-01-15	0.00747633	0.0116298	1.93443	0	0	158.54	776.212	CXCL5
Receptor Ligand Activity (GO:0048018)	2/380	0.0146479	0.0205071	1.6881	0	0	12.9709	54.782	IL6;PDGFA
CCR Chemokine Receptor Binding (GO:0048020)	1943-01-01	0.0212978	0.0271062	1.56693	0	0	52.7725	203.129	CCL27
Cytokine Receptor Binding (GO:0005126)	1/109	0.0531941	0.0620597	1.20719	0	0	20.4547	60.0103	IL6
Protein Heterodimerization Activity (GO:0046982)	1/216	0.102921	0.110838	0.95531	0	0	10.2196	23.2373	PDGFA
Protein Homodimerization Activity (GO:0042803)	1/680	0.292483	0.292483	0.5339	0	0	3.16004	3.8848	PDGFA

## Sheet: GO_CC
Term	Overlap	P-value	Adjusted P-value	#NAME?	Old P-value	Old Adjusted P-value	Odds Ratio	Combined Score	Genes
Endoplasmic Reticulum Lumen (GO:0005788)	2/289	0.00867353	0.104915	0.979163	0	0	17.1629	81.4805	IL6;PDGFA
Microvillus (GO:0005902)	1958-01-01	0.0286306	0.104915	0.979163	0	0	38.8558	138.065	PDGFA
Platelet Alpha Granule Lumen (GO:0031093)	1966-01-01	0.0325213	0.104915	0.979163	0	0	34.0598	116.684	PDGFA
Actin-Based Cell Projection (GO:0098858)	1988-01-01	0.0431482	0.104915	0.979163	0	0	25.4189	79.8945	PDGFA
Platelet Alpha Granule (GO:0031091)	1990-01-01	0.0441091	0.104915	0.979163	0	0	24.8452	77.5441	PDGFA
Golgi Lumen (GO:0005796)	1999-01-01	0.0484222	0.104915	0.979163	0	0	22.5533	68.2868	PDGFA
Intracellular Organelle Lumen (GO:0070013)	2/912	0.073307	0.136142	0.866009	0	0	5.24176	13.6972	IL6;PDGFA
Secretory Granule Lumen (GO:0034774)	1/316	0.147257	0.213764	0.670066	0	0	6.94004	13.2942	PDGFA
Collagen-Containing Extracellular Matrix (GO:0062023)	1/383	0.175848	0.213764	0.670066	0	0	5.70332	9.91312	ICAM1
Focal Adhesion (GO:0005925)	1/387	0.177528	0.213764	0.670066	0	0	5.64306	9.75476	ICAM1
Cell-Substrate Junction (GO:0030055)	1/395	0.180877	0.213764	0.670066	0	0	5.52623	9.4495	ICAM1
Golgi Membrane (GO:0000139)	1/476	0.214105	0.231947	0.634611	0	0	4.56491	7.03584	PDGFA
Bounding Membrane of Organelle (GO:0098588)	1/881	0.362754	0.362754	0.440388	0	0	2.41288	2.44673	PDGFA
