# Supplementary material for: Network-Level Organization of Systemic Inflammation Reflects Early Alzheimer’s-Like Behavioral Changes
Source: Research Square preprint supplement (doi:10.21203/rs.3.rs-7482654/v1), 2025-10-14
Supplement: Supplementary file 4 [file 7372d2f37cf7230792b9eb1a.xlsx]

## Sheet: Sheet1
Rat ID	Sex	Genptype	Tnfrsf9	Activin A	Adiponectin	CD80	CD86	b-NGF	CD48	CINC-1	CINC-2	CINC-3	CNTF	CCL27	Decorin	Eotaxin	EphA5	Erythropoietin	FGF-BP	FLT3LG	Fractalkine	Galectin-1	Galectin-3	Gas 1	GFRa1	GMCSF	IL6ST	HGF	ICAM-1	IFNg	IL1RL2	IL1r1	IL10	IL13	IL17F	IL1a	IL1b	IL2	IL2ra	IL22	IL3	IL4	IL6	IL7	JAM-A	CXCL5	L-Selectin	MCP1	MIP1a
1339	F	WT	0	0	0	0	96.3885	196.558	#DIV/0!	129.9	95.2248	0	115.589	0	80.503	88.2	0	0	0	81.3781	93.9764	58.3181	131.574	79.6183	82.6634	0	1400	102.7	97.0652	124.256	1400	127.172	143.063	81.9012	101.317	85.586	129.745	132.461	163.596	0	1151.15	122.64	0	139.638	98.7601	123.205	118.886	141.096	843.593
1341	M	WT	0	0	0	0	87.7211	194.566	#DIV/0!	99.1576	125.054	0	130.386	0	110.211	92.0203	0	0	0	98.9399	76.3417	123.97	118.227	105.952	129.401	0	0	94.4583	120.337	130.14	0	155.758	133.432	85.5074	41.1627	119	116.06	129.651	53.2412	0	0	121.102	0	99.3685	117.243	81.6951	85.0965	119.011	0
1342	M	WT	0	1295.34	0	1400	102.612	0	#DIV/0!	85.3171	107.756	0	114.619	1400	116.012	106.691	0	0	0	122.105	85.3407	148.988	101.955	128.984	177.718	55.184	0	124.326	90.927	123.138	0	108.51	113.356	107.415	133.695	218.44	106.634	105.162	83.9983	0	0	108.086	344.051	141.102	125.428	98.3329	88.6745	104.964	0
1344	F	WT	0	0	0	0	76.6797	98.7253	#DIV/0!	129.715	101.3	0	121.635	0	87.018	95.2488	0	0	0	86.9902	81.4962	80.0318	90.9165	73.2024	23.2504	0	0	85.9787	66.4318	86.0044	0	1.41568	103.846	56.1346	20.5689	72.5084	114.806	118.536	85.5886	0	0	99.6404	0	59.2943	87.5974	107.883	80.4542	97.7771	0
1345	F	WT	0	0	0	0	122.295	24.6532	#DIV/0!	71.8161	199.293	0	150.224	0	115.494	108.708	0	0	0	109.765	111.637	127.596	108.566	91.759	46.9023	281.303	0	112.595	72.2707	130.166	0	24.5016	127.018	228.878	138.435	68.1239	121.916	116.546	104.79	0	0	132.955	213.003	107.947	131.672	91.3026	80.9002	94.7625	0
1352	M	WT	0	0	0	0	128.742	91.0238	#DIV/0!	92.4778	105.711	0	156.192	0	87.9845	84.1114	0	0	0	62.6673	96.1904	120.425	41.3825	99.4906	118.585	175.654	0	95.1395	146.998	110.843	0	303.935	147.211	185.825	61.5853	94.154	130.55	121.523	37.1737	0	0	129.132	0	33.1004	69.9037	93.5891	109.954	133.769	0
1382	F	WT	432.767	0	0	0	118.22	183.333	#DIV/0!	100.446	132.726	0	113.73	0	111.103	110.923	0	0	0	110.461	83.7584	104.39	124.979	96.504	91.7214	163.512	0	99.58	79.4646	99.3399	0	45.7317	87.6646	142.386	104.287	182.014	85.9223	92.4123	127.354	0	0	90.8717	334.308	103.612	93.7779	99.7757	87.3884	68.9034	0
1388	M	WT	0	0	0	0	195.328	346.105	#DIV/0!	122.301	140.909	0	106.322	0	86.2745	104.66	0	0	0	94.4796	118.731	70.7376	60.9316	120.707	168.741	84.9537	0	101.351	78.9628	165.269	0	221.606	148.822	227.389	113.932	133.789	149.338	150.038	97.9419	1400	248.851	171.344	0	171.399	92.9466	116.986	85.1439	113.06	556.407
1401	F	WT	0	0	0	0	35.7515	0	#DIV/0!	117.936	30.7971	0	48.8024	0	90.5339	94.7603	0	0	0	93.0313	115.414	72.9256	86.0724	80.7588	5.12367	0	0	89.8228	122.53	19.3588	0	0	37.6605	0	43.5937	0	69.2247	50.0538	92.6891	0	0	55.5288	0	42.6856	76.9816	100.683	135.971	118.695	0
1404	F	WT	0	0	0	0	64.6098	0	#DIV/0!	93.7676	62.7007	0	20.4645	0	103.502	93.8838	0	0	0	116.926	107.446	112.007	102.478	98.4458	37.8072	100.782	0	91.4683	103.835	51.9889	0	82.2808	44.2453	0	117.944	18.2998	49.706	62.3144	115.034	0	0	60.98	0	75.203	77.4064	103.009	92.2501	83.5008	0
1405	M	WT	0	0	0	0	129.607	155.895	#DIV/0!	75.8997	133.617	0	119.038	0	115.266	112.217	0	0	0	103.871	97.2922	138.694	120.739	121.388	205.451	253.016	0	114.465	116.063	110.739	0	108.565	79.9551	65.5811	127.094	154.464	102.485	79.9628	84.3606	0	0	99.7806	350.15	114.941	132.414	102.022	89.6705	81.8976	0
1407	M	WT	0	0	0	0	59.3356	109.141	#DIV/0!	87.5784	27.3179	0	27.4648	0	87.6643	82.7098	0	0	0	99.9798	91.181	59.2564	88.2899	112.355	160.734	0	0	97.298	118.892	52.5887	0	46.5941	55.0756	28.0379	130.752	2.68288	57.6717	69.016	123.394	0	0	51.9474	0	95.4719	92.2351	101.173	88.1178	75.8931	0
1410	F	WT	967.233	0	0	0	67.5316	0	#DIV/0!	106.411	14.2026	0	62.1376	0	98.3397	102.749	0	0	0	108.372	118.844	94.0884	112.608	89.1936	79.9198	0	0	86.5041	119.066	80.5459	0	171.767	66.2414	80.3907	141.646	62.6273	70.8044	78.9113	127.45	0	0	68.9821	158.488	107.518	96.6756	94.5451	169.695	79.1732	0
1412	F	WT	0	104.657	0	0	115.178	0	#DIV/0!	87.2774	123.391	0	113.395	0	110.094	123.117	0	0	0	111.033	122.352	88.5725	111.28	101.64	71.982	285.596	0	104.313	67.157	115.622	0	2.16413	112.41	110.554	123.987	188.31	95.1356	93.4125	103.389	0	0	87.0095	0	108.721	106.959	85.7974	87.7986	87.4982	0
1340	F	AD	0	167.387	0	0	106.637	397.391	#DIV/0!	100.428	81.8768	0	103.229	0	78.164	103.644	0	0	0	83.0192	103.41	60.1262	92.2898	72.1711	18.6189	152.829	0	88.3602	74.7322	117.75	0	23.6652	106.896	141.097	39.4736	80.7225	90.4868	110.773	65.6094	0	0	111.21	0	53.8694	87.8341	110.169	91.354	95.5096	0
1343	F	AD	0	291.348	0	0	91.7623	29.7841	#DIV/0!	96.1222	160.184	0	123.541	8305.4	75.9607	100.903	0	0	0	67.4655	75.8707	74.9414	56.3667	69.0143	58.3982	256.143	0	103.164	59.6703	90.6056	0	0	81.344	190.554	130.593	192.809	101.892	101.6	53.4461	0	0	82.9981	1366.29	68.4948	64.5237	80.7934	87.8021	72.5284	138.042
1346	F	AD	0	0	0	0	113.987	380.086	#DIV/0!	114.587	93.5445	0	177.657	0	96.7467	109.811	0	0	0	95.6534	65.0015	109.526	86.5374	101.087	243.017	229.626	0	118.397	79.3543	112.128	0	141.901	114.125	170.191	231.908	169.672	117.441	96.7171	133.101	22047.7	0	110.604	1463.4	233.035	116.489	95.868	83.5297	93.4484	433.56
1348	M	AD	0	406.551	0	0	106.491	13.1757	#DIV/0!	70.1395	110.235	0	133.468	4237.56	79.7832	91.7322	0	0	0	53.9779	73.3433	86.5368	43.679	86.9726	110.85	214.509	0	109.779	77.5308	97.2098	0	72.7214	95.9874	162.429	90.1504	143.27	115.962	88.5593	39.8425	0	0	106.031	1230.28	62.5168	81.0149	90.1619	82.6912	110.638	79.3027
1349	M	AD	0	0	0	0	98.5137	30.0311	#DIV/0!	69.0845	158.195	0	109.248	0	109.025	119.16	0	0	0	115.349	70.2033	124.535	89.1149	125.62	175.133	453.727	0	126.988	81.0399	104.843	0	61.8721	121.714	171.997	75.7184	122.134	104.852	111.478	61.7488	0	0	93.3429	1762.06	88.5748	101.822	91.6724	124.313	90.7134	0
1353	M	AD	0	0	0	0	71.4279	196.141	#DIV/0!	68.3165	23.8103	0	91.2459	0	75.423	63.0875	0	0	0	65.8485	73.2796	56.9511	46.5429	84.8514	188.597	0	0	89.6243	104.544	135.52	11173.7	79.3192	135.552	72.1487	18.2497	118.361	149.119	150.15	123.268	0	1018.5	167.607	0	27.4052	98.8383	94.1973	117.635	136.255	1337.7
1385	M	AD	0	236.866	0	0	48.1947	26.7977	#DIV/0!	58.6502	7.60953	0	9.36034	9461.47	78.6847	102.504	0	0	0	109.653	61.4847	80.894	89.0248	120.181	101.27	11.7413	0	97.5873	115.277	41.7358	0	99.4599	42.6722	0	73.4473	0	56.352	63.1809	57.5753	0	0	54.7967	0	53.9138	69.1362	103.018	91.3598	63.5725	0
1386	M	AD	0	73.1706	0	0	110.061	435.569	#DIV/0!	61.5443	108.319	0	107.895	0	97.5499	109.206	0	0	0	97.8124	137.952	83.9318	116.026	136.311	179.705	0	0	108.933	123.915	117.057	1679.87	121.395	133.63	118.442	70.0989	116.955	118.747	125.172	78.7663	0	223.94	105.891	0	109.88	111.197	129.421	136.319	110.443	446.376
1387	M	AD	0	0	0	0	111.222	144.697	#DIV/0!	65.6207	140.409	0	106.391	0	91.6659	106.988	0	0	0	111.939	98.4675	74.9427	123.937	124.933	122.67	0	0	105.938	101.368	103.56	41.9462	61.5631	99.7045	136.392	123.148	76.6328	84.1103	86.3689	86.482	0	0	44.4701	0	100.097	121.798	108.917	91.7068	70.8157	0
1389	F	AD	0	0	0	0	40.7844	0	#DIV/0!	76.8798	0	0	28.3086	0	98.8042	98.9537	0	0	0	104.431	47.5568	118.017	72.0931	87.4129	23.5706	0	0	96.9782	108.037	34.3654	0	77.3179	21.3427	0	111.455	0	50.5459	40.918	91.3479	0	0	25.5371	0	75.8712	58.7436	90.6176	84.479	52.3712	316.315
1403	F	AD	0	122.56	0	0	68.6377	0	#DIV/0!	97.9952	52.0122	0	43.2716	0	83.8536	84.94	0	0	0	47.2723	76.7017	64.4107	67.5609	72.0074	5.35294	17.6592	0	85.6887	96.0582	55.3739	0	0	58.2234	25.1544	35.1067	3.06466	54.2394	60.9783	39.168	0	0	63.6056	0	44.253	74.4477	113.057	60.4564	83.6667	0
1408	F	AD	0	0	0	0	57.4614	0	#DIV/0!	80.9832	27.3947	0	38.681	0	73.9365	83.8945	0	0	0	76.0465	64.445	59.7406	97.8355	80.3251	0	0	0	89.9286	104.974	30.4518	0	0	33.5162	0	48.5339	0	79.2698	54.1834	80.141	0	0	67.0907	0	40.1657	90.2402	94.2535	93.0831	91.7417	0
1413	M	AD	0	1361.8	0	0	63.1472	0	#DIV/0!	69.4095	27.3182	0	36.2228	0	81.7237	96.4428	0	0	0	89.9676	59.0439	76.9079	119.939	97.3471	102.095	0	0	89.0256	118.138	46.9182	0	87.2599	49.6595	0	34.247	25.7727	70.8106	67.6298	63.2926	0	0	40.9571	0	42.9694	90.5417	109.068	88.2197	73.6749	0
1414	M	AD	0	20.1392	0	0	30.0804	0	#DIV/0!	49.307	0	0	53.8558	0	84.6189	105.524	0	0	0	81.4667	50.8727	81.8327	82.2862	105.44	159.989	0	0	103.26	72.5037	13.3688	0	53.5407	24.5585	0	90.3398	0	68.6172	42.4477	88.8411	0	0	50.6282	0	68.7237	84.5184	111.061	59.6648	73.1492	0
[truncated: 20 more columns]
