# Supplementary material for: Network-Level Organization of Systemic Inflammation Reflects Early Alzheimer’s-Like Behavioral Changes
Source: Research Square preprint supplement (doi:10.21203/rs.3.rs-7482654/v1), 2025-10-14
Supplement: Supplementary file 5 [file 74bbfa31a0a2f75b84b8d48d.xlsx]

## Sheet: KEGG
Term	Overlap	P-value	Adjusted P-value	#NAME?	Old P-value	Old Adjusted P-value	Odds Ratio	Combined Score	Genes
Cytokine-cytokine receptor interaction	10/295	3.44e-14	2.68e-12	11.6	0	0	76.7875	2380.51	IL10;IL4;IL1A;CNTF;IFNG;IL1R1;IL1B;IL13;PRLR;IL2
Inflammatory bowel disease	1965-07-01	1.34e-13	5.23e-12	11.3	0	0	200.375	5939.21	IL10;IL4;IL1A;IFNG;IL1B;IL13;IL2
JAK-STAT signaling pathway	7/162	9.32e-11	2.42e-09	8.62	0	0	74.614	1723.28	IL10;IL4;CNTF;IFNG;IL13;PRLR;IL2
Allograft rejection	1938-05-01	2.15e-10	4.19e-09	8.38	0	0	215.887	4805.99	CD86;IL10;IL4;IFNG;IL2
Graft-versus-host disease	1942-05-01	3.63e-10	5.34e-09	8.27	0	0	192.51	4184.45	CD86;IL1A;IFNG;IL1B;IL2
Type I diabetes mellitus	1943-05-01	4.11e-10	5.34e-09	8.27	0	0	187.434	4051.07	CD86;IL1A;IFNG;IL1B;IL2
Leishmaniasis	1977-05-01	8.26e-09	9.21e-08	7.04	0	0	98.755	1837.97	IL10;IL4;IL1A;IFNG;IL1B
Th1 and Th2 cell differentiation	1992-05-01	2.04e-08	1.99e-07	6.7	0	0	81.6667	1446.18	NOTCH2;IL4;IFNG;IL13;IL2
Th17 cell differentiation	5/107	4.37e-08	3.79e-07	6.42	0	0	69.6043	1179.53	IL4;IFNG;IL1R1;IL1B;IL2
Intestinal immune network for IgA production	1948-04-01	1.1e-07	8.6e-07	6.07	0	0	120.83	1935.82	CD86;IL10;IL4;IL2
Autoimmune thyroid disease	1953-04-01	1.65e-07	1.17e-06	5.93	0	0	108.473	1693.84	CD86;IL10;IL4;IL2
Rheumatoid arthritis	1993-04-01	1.61e-06	1.01e-05	5	0	0	59.6015	795.059	CD86;IL1A;IFNG;IL1B
IL-17 signaling pathway	1994-04-01	1.68e-06	1.01e-05	5	0	0	58.9363	783.658	IL4;IFNG;IL1B;IL13
Hematopoietic cell lineage	1999-04-01	2.07e-06	1.14e-05	4.94	0	0	55.8204	730.638	IL4;IL1A;IL1R1;IL1B
Amoebiasis	4/102	2.33e-06	1.14e-05	4.94	0	0	54.1034	701.703	IL10;IFNG;IL1R1;IL1B
Chagas disease	4/102	2.33e-06	1.14e-05	4.94	0	0	54.1034	701.703	IL10;IFNG;IL1B;IL2
T cell receptor signaling pathway	4/104	2.52e-06	1.16e-05	4.94	0	0	53.016	683.484	IL10;IL4;IFNG;IL2
Asthma	2025-03-31	3.21e-06	1.39e-05	4.86	0	0	133.614	1690.01	IL10;IL4;IL13
African trypanosomiasis	1937-03-01	5.53e-06	2.18e-05	4.66	0	0	110.002	1331.54	IL10;IFNG;IL1B
Osteoclast differentiation	4/127	5.58e-06	2.18e-05	4.66	0	0	43.0526	520.764	IL1A;IFNG;IL1R1;IL1B
Fluid shear stress and atherosclerosis	4/139	7.99e-06	2.97e-05	4.53	0	0	39.202	460.15	IL1A;IFNG;IL1R1;IL1B
Malaria	1950-03-01	1.38e-05	4.91e-05	4.31	0	0	79.5239	889.656	IL10;IFNG;IL1B
Tuberculosis	4/180	2.21e-05	7.5e-05	4.12	0	0	30.0076	321.641	IL10;IL1A;IFNG;IL1B
Pertussis	1976-03-01	4.89e-05	0.000159	3.8	0	0	51.1336	507.533	IL10;IL1A;IL1B
Pathways in cancer	5/531	0.000111	0.000345	3.46	0	0	13.2095	120.338	NOTCH2;IL4;IFNG;IL13;IL2
C-type lectin receptor signaling pathway	3/104	0.000125	0.000374	3.43	0	0	36.9059	331.807	IL10;IL1B;IL2
Systemic lupus erythematosus	3/135	0.000269	0.000778	3.11	0	0	28.1946	231.755	CD86;IL10;IFNG
Yersinia infection	3/137	0.000281	0.000783	3.11	0	0	27.771	227.072	IL10;IL1B;IL2
Measles	3/139	0.000293	0.000789	3.1	0	0	27.3598	222.545	IL1A;IL1B;IL2
Necroptosis	3/159	0.000435	0.00113122	2.95	0	0	23.8281	184.429	IL1A;IFNG;IL1B
Influenza A	3/172	0.000547	0.00137701	2.86	0	0	21.9808	165.088	IL1A;IFNG;IL1B
Fc epsilon RI signaling pathway	1968-02-01	0.0018763	0.00457348	2.34	0	0	35.4991	222.88	IL4;IL13
MAPK signaling pathway	3/294	0.00255881	0.00604809	2.22	0	0	12.6869	75.7179	IL1A;IL1R1;IL1B
Inflammatory mediator regulation of TRP channels	1998-02-01	0.00384904	0.00864536	2.06	0	0	24.3689	135.489	IL1R1;IL1B
AGE-RAGE signaling pathway in diabetic complications	2/100	0.00400405	0.00864536	2.06	0	0	23.8691	131.768	IL1A;IL1B
Viral protein interaction with cytokine and cytokine receptor	2/100	0.00400405	0.00864536	2.06	0	0	23.8691	131.768	IL10;IL2
PI3K-Akt signaling pathway	3/354	0.00431647	0.00864536	2.06	0	0	10.4861	57.1002	IL4;PRLR;IL2
Toll-like receptor signaling pathway	2/104	0.00432268	0.00864536	2.06	0	0	22.9285	124.82	CD86;IL1B
NF-kappa B signaling pathway	2/104	0.00432268	0.00864536	2.06	0	0	22.9285	124.82	IL1R1;IL1B
HIF-1 signaling pathway	2/109	0.00473703	0.00923722	2.03	0	0	21.8516	116.957	IFNG;TIMP1
Toxoplasmosis	2/112	0.00499415	0.00950106	2.02	0	0	21.2524	112.627	IL10;IFNG
Non-alcoholic fatty liver disease	2/155	0.00935913	0.0173813	1.76	0	0	15.2464	71.2223	IL1A;IL1B
Pathogenic Escherichia coli infection	2/197	0.0147853	0.0268198	1.57	0	0	11.9373	50.3051	IL1R1;IL1B
Human T-cell leukemia virus 1 infection	2/219	0.0180564	0.032009	1.49	0	0	10.7151	43.0132	IL1R1;IL2
Human cytomegalovirus infection	2/225	0.0189974	0.0329289	1.48	0	0	10.4236	41.3136	IL1R1;IL1B
Coronavirus disease	2/232	0.0201212	0.0341186	1.47	0	0	10.1028	39.4614	IL1B;IL2
Shigellosis	2/246	0.0224511	0.0372593	1.43	0	0	9.51639	36.1282	IL1R1;IL1B
Prion disease	2/273	0.0272447	0.0442727	1.35	0	0	8.55654	30.8283	IL1A;IL1B
Proteasome	1946-01-01	0.0428257	0.0681716	1.17	0	0	24.6123	77.544	IFNG
Alzheimer disease	2/369	0.0472133	0.0736528	1.13	0	0	6.28755	19.1964	IL1A;IL1B
Legionellosis	1957-01-01	0.0528061	0.0807623	1.09	0	0	19.7669	58.1369	IL1B
Notch signaling pathway	1959-01-01	0.0546101	0.0816953	1.09	0	0	19.0833	55.4855	NOTCH2
Viral myocarditis	1960-01-01	0.0555109	0.0816953	1.09	0	0	18.7589	54.2354	CD86
Cytosolic DNA-sensing pathway	1963-01-01	0.0582084	0.0840788	1.08	0	0	17.8486	50.7564	IL1B
Prolactin signaling pathway	1970-01-01	0.0644741	0.0914359	1.04	0	0	16.0322	43.9522	PRLR
Antigen processing and presentation	1978-01-01	0.0715865	0.0997098	1	0	0	14.3608	37.8671	IFNG
Pathways of neurodegeneration	2/475	0.0737859	0.10097	0.996	0	0	4.85213	12.6475	IL1A;IL1B
Herpes simplex virus 1 infection	2/498	0.0800808	0.107458	0.969	0	0	4.62168	11.6684	IFNG;IL1B
PD-L1 expression and PD-1 checkpoint pathway in cancer	1989-01-01	0.0812825	0.107458	0.969	0	0	12.5587	31.5202	IFNG
TGF-beta signaling pathway	1994-01-01	0.085658	0.110646	0.956	0	0	11.8805	29.1951	IFNG
Staphylococcus aureus infection	1995-01-01	0.0865307	0.110646	0.956	0	0	11.7535	28.7639	IL10
TNF signaling pathway	1/112	0.101247	0.127375	0.895	0	0	9.94494	22.7759	IL1B
Thyroid hormone signaling pathway	1/121	0.108947	0.134886	0.87	0	0	9.19491	20.3842	NOTCH2
Natural killer cell mediated cytotoxicity	1/131	0.117428	0.140914	0.851	0	0	8.48333	18.1707	IFNG
FoxO signaling pathway	1/131	0.117428	0.140914	0.851	0	0	8.48333	18.1707	IL10
Breast cancer	1/147	0.130841	0.15329	0.814	0	0	7.54756	15.3501	NOTCH2
Cell adhesion molecules	1/148	0.131672	0.15329	0.814	0	0	7.49584	15.1974	CD86
Cellular senescence	1/156	0.1383	0.157272	0.803	0	0	7.10609	14.0582	IL1A
Hepatitis C	1/157	0.139125	0.157272	0.803	0	0	7.06019	13.9254	IFNG
NOD-like receptor signaling pathway	1/181	0.158703	0.17684	0.752	0	0	6.11142	11.2494	IL1B
Transcriptional misregulation in cancer	1/192	0.167535	0.182361	0.739	0	0	5.75625	10.2839	CD86
Kaposi sarcoma-associated herpesvirus infection	1/193	0.168333	0.182361	0.739	0	0	5.72598	10.2026	CD86
Lipid and atherosclerosis	1/215	0.185718	0.198438	0.702	0	0	5.13162	8.63922	IL1B
Chemical carcinogenesis	1/239	0.20429	0.215333	0.667	0	0	4.60854	7.31936	NOTCH2
Salmonella infection	1/249	0.211909	0.220386	0.657	0	0	4.42047	6.85879	IL1B
MicroRNAs in cancer	1/310	0.256912	0.263672	0.579	0	0	3.53686	4.80667	NOTCH2
Human papillomavirus infection	1/331	0.271833	0.275363	0.56	0	0	3.30825	4.30922	NOTCH2
Neuroactive ligand-receptor interaction	1/341	0.278838	0.278838	0.555	0	0	3.20931	4.09869	PRLR

## Sheet: Reactome
Term	Overlap	P-value	Adjusted P-value	Old P-value	Old Adjusted P-value	Odds Ratio	Combined Score	Genes
Signaling by Interleukins	11/452	4.47085e-14	4.51556e-12	0	0	60.924	1872.72	CD86;IL10;IL4;IL1A;CNTF;IFNG;IL1R1;IL1B;IL13;TIMP1;IL2
Cytokine Signaling in Immune System	12/776	4.20057e-13	2.12129e-11	0	0	43.1197	1228.84	CD86;IL10;IL4;IL1A;CNTF;IFNG;IL1R1;IL1B;IL13;TIMP1;PRLR;IL2
Interleukin-10 Signaling	1946-06-01	2.79715e-12	9.41706e-11	0	0	230.088	6120.91	CD86;IL10;IL1A;IL1R1;IL1B;TIMP1
Interleukin-4 and Interleukin-13 Signaling	6/112	6.88646e-10	1.73883e-08	0	0	86.5385	1825.64	IL10;IL4;IL1A;IL1B;IL13;TIMP1
Immune System	2150-12-01	5.64717e-08	1.14073e-06	0	0	14.3068	238.774	CD86;IL10;IL4;IL1A;CNTF;IFNG;IL1R1;IL1B;IL13;TIMP1;PRLR;IL2
Interleukin-1 Family Signaling	5/140	1.68083e-07	2.8294e-06	0	0	52.5026	818.979	IL4;IL1A;IL1R1;IL1B;IL13
Interleukin-18 Signaling	2025-02-08	2.38586e-05	0.000344246	0	0	391.667	4168.65	IL4;IL13
Interleukin-1 Processing	2025-02-09	3.06581e-05	0.000387058	0	0	335.697	3488.77	IL1A;IL1B
RUNX1 and FOXP3 Control the Development of Regulatory T Lymphocytes (Tregs)	2025-02-10	3.83009e-05	0.000429822	0	0	293.721	2987.15	IFNG;IL2
Interleukin-1 Signaling	3/102	0.000117597	0.00118773	0	0	37.6553	340.715	IL1A;IL1R1;IL1B
Cell Recruitment (Pro-Inflammatory Response)	2025-02-27	0.000295889	0.00229883	0	0	93.9106	763.073	IL1A;IL1B
Purinergic Signaling in Leishmaniasis Infection	2025-02-27	0.000295889	0.00229883	0	0	93.9106	763.073	IL1A;IL1B
Pyroptosis	2025-02-27	0.000295889	0.00229883	0	0	93.9106	763.073	IL1A;IL1B
Gene and Protein Expression by JAK-STAT Signaling After Interleukin-12 Stimulation	1937-02-01	0.000558262	0.00402746	0	0	67.0454	502.216	IL10;IFNG
Interleukin-12 Signaling	1946-02-01	0.000863163	0.00581197	0	0	53.3075	376.079	IL10;IFNG
Interleukin-12 Family Signaling	1956-02-01	0.00127708	0.00806154	0	0	43.4139	289.275	IL10;IFNG
Regulated Necrosis	1961-02-01	0.00151328	0.0080898	0	0	39.7248	257.952	IL1A;IL1B
Leishmania Infection	3/245	0.00152184	0.0080898	0	0	15.2936	99.2226	IL10;IL1A;IL1B
Parasitic Infection Pathways	3/245	0.00152184	0.0080898	0	0	15.2936	99.2226	IL10;IL1A;IL1B
Defective LFNG Causes SCDO3	2025-01-05	0.00474139	0.023944	0	0	277.458	1484.8	NOTCH2
Pre-NOTCH Processing in the Endoplasmic Reticulum	2025-01-06	0.00568712	0.026109	0	0	221.956	1147.41	NOTCH2
CLEC7A Inflammasome Pathway	2025-01-06	0.00568712	0.026109	0	0	221.956	1147.41	IL1B
IFNG Signaling Activates MAPKs	2025-01-08	0.00757601	0.0332686	0	0	158.524	774.035	IFNG
CD163 Mediating an Anti-Inflammatory Response	2025-01-09	0.00851919	0.0358516	0	0	138.701	660.972	IL10
TGFBR3 PTM Regulation	2025-01-11	0.010403	0.0403774	0	0	110.95	506.56	TIMP1
NOTCH2 Intracellular Domain Regulates Transcription	2025-01-12	0.0113436	0.0403774	0	0	100.859	451.756	NOTCH2
Interleukin-2 Signaling	2025-01-12	0.0113436	0.0403774	0	0	100.859	451.756	IL2
CD28 Dependent Vav1 Pathway	2025-01-12	0.0113436	0.0403774	0	0	100.859	451.756	CD86
Disease	2131-06-01	0.0115935	0.0403774	0	0	3.87823	17.2865	CD86;IL10;NOTCH2;IL1A;IL1R1;IL1B
Regulation of IFNG Signaling	2025-01-14	0.0132223	0.0445152	0	0	85.3333	369.139	IFNG
Prolactin Receptor Signaling	2025-01-15	0.0141604	0.0461356	0	0	79.2341	337.324	PRLR
Programmed Cell Death	2/202	0.0155036	0.0474503	0	0	11.6359	48.4831	IL1A;IL1B
Transcriptional Regulation by RUNX1	2/202	0.0155036	0.0474503	0	0	11.6359	48.4831	IFNG;IL2
IL-6-type Cytokine Receptor Ligand Interactions	2025-01-17	0.0160341	0.0476306	0	0	69.3229	286.514	CNTF
Pre-NOTCH Processing in Golgi	2025-01-18	0.0169696	0.0489695	0	0	65.2418	265.947	NOTCH2
NOTCH4 Intracellular Domain Regulates Transcription	2025-01-20	0.0188382	0.0528517	0	0	58.3684	231.832	NOTCH2
CTLA4 Inhibitory Signaling	2025-01-21	0.0197713	0.0539702	0	0	55.4472	217.549	CD86
Interleukin-6 Family Signaling	2025-01-24	0.0225653	0.0569774	0	0	48.2077	182.772	CNTF
CD28 Dependent PI3K Akt Signaling	2025-01-24	0.0225653	0.0569774	0	0	48.2077	182.772	CD86
Growth Hormone Receptor Signaling	2025-01-24	0.0225653	0.0569774	0	0	48.2077	182.772	PRLR
NOTCH2 Activation and Transmission of Signal to the Nucleus	2025-01-25	0.023495	0.0578779	0	0	46.1968	173.283	NOTCH2
Interleukin Receptor SHC Signaling	2025-01-27	0.0253518	0.0609651	0	0	42.6389	156.694	IL2
Notch-HLH Transcription Pathway	2025-01-28	0.026279	0.0617251	0	0	41.0576	149.408	NOTCH2
Activation of Matrix Metalloproteinases	1933-01-01	0.0309023	0.0709348	0	0	34.6337	120.419	TIMP1
Infectious Disease	4/1311	0.0322789	0.0718983	0	0	3.81005	13.0812	IL10;IL1A;IL1R1;IL1B
CD28 Co-Stimulation	1935-01-01	0.0327458	0.0718983	0	0	32.5931	111.435	CD86
Signaling by NOTCH2	1936-01-01	0.0336663	0.0723467	0	0	31.6603	107.368	NOTCH2
Interleukin-2 Family Signaling	1944-01-01	0.0410005	0.0862718	0	0	25.7597	82.2809	IL2
Interleukin-3, Interleukin-5 and GM-CSF Signaling	1948-01-01	0.0446477	0.0920262	0	0	23.5626	73.2551	IL2
Signaling by TGFBR3	1949-01-01	0.0455575	0.0920262	0	0	23.0706	71.26	TIMP1
Diseases Associated With O-glycosylation of Proteins	1971-01-01	0.0653659	0.126074	0	0	15.8024	43.105	NOTCH2
Signaling by NOTCH4	1972-01-01	0.066257	0.126074	0	0	15.579	42.2848	NOTCH2
Pre-NOTCH Transcription and Translation	1973-01-01	0.0671473	0.126074	0	0	15.3619	41.4904	NOTCH2
Diseases of Signal Transduction by Growth Factor Receptors and Second Messengers	2/451	0.0674057	0.126074	0	0	5.11778	13.8028	CD86;IL10
Costimulation by the CD28 Family	1978-01-01	0.0715865	0.131459	0	0	14.3608	37.8671	CD86
Senescence-Associated Secretory Phenotype (SASP)	1981-01-01	0.0742404	0.133898	0	0	13.8201	35.9385	IL1A
Constitutive Signaling by Aberrant PI3K in Cancer	1983-01-01	0.0760057	0.134677	0	0	13.4817	34.7416	CD86
CLEC7A (Dectin-1) Signaling	1987-01-01	0.0795268	0.138486	0	0	12.8521	32.5371	IL1B
Pre-NOTCH Expression and Processing	1989-01-01	0.0812825	0.139145	0	0	12.5587	31.5202	NOTCH2
Signaling by ALK Fusions and Activated Point Mutants	1993-01-01	0.0847845	0.140381	0	0	12.0103	29.637	IL10
Signaling by ALK in Cancer	1993-01-01	0.0847845	0.140381	0	0	12.0103	29.637	IL10
Interferon Gamma Signaling	1999-01-01	0.0900137	0.146635	0	0	11.2715	27.1395	IFNG
Post-translational Protein Phosphorylation	1/107	0.0969421	0.155415	0	0	10.4167	24.3088	TIMP1
PI3K AKT Signaling in Cancer	1/110	0.0995273	0.155987	0	0	10.1284	23.3696	CD86
PI5P, PP2A and IER3 Regulate PI3K AKT Signaling	1/111	0.100387	0.155987	0	0	10.0359	23.0696	CD86
Negative Regulation of the PI3K AKT Network	1/118	0.106387	0.161818	0	0	9.4321	21.1342	CD86
Generic Transcription Pathway	3/1230	0.107886	0.161818	0	0	2.86583	6.3813	NOTCH2;IFNG;IL2
FCGR3A-mediated IL10 Synthesis	1/121	0.108947	0.161818	0	0	9.19491	20.3842	IL10
Regulation of IGF Transport and Uptake by Insulin-like Growth Factor Binding Proteins (IGFBPs)	1/124	0.111499	0.163209	0	0	8.96929	19.6763	TIMP1
Platelet Degranulation	1/128	0.114892	0.165773	0	0	8.68504	18.7924	TIMP1
C-type Lectin Receptors (CLRs)	1/131	0.117428	0.167046	0	0	8.48333	18.1707	IL1B
Response to Elevated Platelet Cytosolic Ca2+	1/133	0.119116	0.167093	0	0	8.35396	17.7744	TIMP1
Degradation of the Extracellular Matrix	1/140	0.124997	0.172941	0	0	7.93046	16.4911	TIMP1
Diseases of Glycosylation	1/146	0.130008	0.177443	0	0	7.6	15.5052	NOTCH2
RNA Polymerase II Transcription	3/1360	0.13502	0.181827	0	0	2.57332	5.15265	NOTCH2;IFNG;IL2
Anti-inflammatory Response Favouring Leishmania Parasite Infection	1/159	0.140773	0.184412	0	0	6.97011	13.6657	IL10
Leishmania Parasite Growth and Survival	1/159	0.140773	0.184412	0	0	6.97011	13.6657	IL10
Signaling by TGFB Family Members	1/161	0.142418	0.184412	0	0	6.88229	13.4135	TIMP1
Potential Therapeutics for SARS	1/164	0.144879	0.185225	0	0	6.7546	13.0489	IL1R1
Cellular Senescence	1/167	0.147334	0.18601	0	0	6.63153	12.6997	IL1A
Signaling by NOTCH	1/209	0.181011	0.225705	0	0	5.28125	9.0267	NOTCH2
Gene Expression (Transcription)	3/1615	0.194456	0.239512	0	0	2.13659	3.49878	NOTCH2;IFNG;IL2
Platelet Activation, Signaling and Aggregation	1/262	0.221711	0.266113	0	0	4.19753	6.32307	TIMP1
Diseases of Metabolism	1/264	0.223209	0.266113	0	0	4.16519	6.24631	NOTCH2
RAF MAP Kinase Cascade	1/265	0.223957	0.266113	0	0	4.1492	6.20846	IL2
MAPK1 MAPK3 Signaling	1/271	0.228429	0.26722	0	0	4.05576	5.98845	IL2
Signal Transduction	2613-04-01	0.23018	0.26722	0	0	1.7756	2.60816	CD86;NOTCH2;TIMP1;IL2
Interferon Signaling	1/280	0.235093	0.267627	0	0	3.92314	5.67983	IFNG
PIP3 Activates AKT Signaling	1/281	0.23583	0.267627	0	0	3.90893	5.64702	CD86
Extracellular Matrix Organization	1/300	0.249705	0.280224	0	0	3.657	5.074	TIMP1
MAPK Family Signaling Cascades	1/314	0.259776	0.288323	0	0	3.49095	4.70557	IL2
Intracellular Signaling by Second Messengers	1/321	0.264763	0.290664	0	0	3.41337	4.53609	CD86
SARS-CoV Infections	1/498	0.380788	0.413544	0	0	2.17796	2.10285	IL1R1
Hemostasis	1/707	0.495466	0.532363	0	0	1.51676	1.06515	TIMP1
Cellular Responses to Stress	1/787	0.533784	0.567497	0	0	1.35673	0.851705	IL1A
Adaptive Immune System	1/854	0.563737	0.593099	0	0	1.2458	0.714051	CD86
Cellular Responses to Stimuli	1/887	0.577811	0.601638	0	0	1.19733	0.656745	IL1A
Viral Infection Pathways	1/1029	0.63361	0.653006	0	0	1.02427	0.467395	IL1R1
Innate Immune System	1/1149	0.675243	0.688884	0	0	0.911392	0.357887	IL1B
Post-translational Protein Modification	1/1457	0.762557	0.770182	0	0	0.706845	0.19161	TIMP1
Metabolism of Proteins	2067-01-01	0.874278	0.874278	0	0	0.481741	0.0647254	TIMP1

## Sheet: GO_BP
Term	Overlap	P-value	Adjusted P-value	#NAME?	Old P-value	Old Adjusted P-value	Odds Ratio	Combined Score	Genes
Cytokine-Mediated Signaling Pathway (GO:0019221)	9/255	6.39e-13	3.07e-10	9.51	0	0	72.2012	2027.34	IL10;IL4;IL1A;CNTF;IL1R1;IL1B;IL13;PRLR;IL2
Positive Regulation of Cytokine Production (GO:0001819)	9/325	5.66e-12	1.36e-09	8.87	0	0	56.0079	1450.43	CD86;IL10;IL4;IL1A;IFNG;IL1R1;IL1B;IL13;IL2
Regulation of Immunoglobulin Production (GO:0002637)	2025-05-31	7.3e-11	1.17e-08	7.93	0	0	274.107	6397.85	CD86;IL10;IL4;IL13;IL2
Positive Regulation of Multicellular Organismal Process (GO:0051240)	8/407	1.71e-09	1.81e-07	6.74	0	0	35.6929	720.609	IL10;IL4;IL1A;IFNG;IL1B;IL13;PRLR;IL2
Regulation of Inflammatory Response (GO:0050727)	7/249	1.89e-09	1.81e-07	6.74	0	0	47.5802	955.727	IL10;IL4;IFNG;IL1R1;IL1B;IL13;IL2
Regulation of Membrane Protein Ectodomain Proteolysis (GO:0051043)	2025-04-25	7.26e-09	5.81e-07	6.24	0	0	253.46	4749.95	IL10;IFNG;IL1B;TIMP1
Regulation of Cell Population Proliferation (GO:0042127)	9/769	1.15e-08	7.85e-07	6.1	0	0	22.7617	416.196	CD86;IL10;IL4;IL1A;IFNG;IL1B;TIMP1;PRLR;IL2
Positive Regulation of Immune Effector Process (GO:0002699)	1936-04-01	3.36e-08	2.02e-06	5.7	0	0	166.242	2860.81	IL10;IFNG;IL1B;IL2
Positive Regulation of Immunoglobulin Production (GO:0002639)	1938-04-01	4.21e-08	2.24e-06	5.65	0	0	156.447	2657.14	CD86;IL10;IL13;IL2
Regulation of Complement-Dependent Cytotoxicity (GO:1903659)	2025-03-09	6.08e-08	2.88e-06	5.54	0	0	624.219	10371.5	IL10;IL4;IL13
Positive Regulation of Production of Molecular Mediator of Immune Response (GO:0002702)	1943-04-01	7.01e-08	2.88e-06	5.54	0	0	136.356	2246.23	CD86;IL10;IL13;IL2
Negative Regulation of Multicellular Organismal Process (GO:0051241)	6/243	7.19e-08	2.88e-06	5.54	0	0	38.4499	632.434	IL10;IL4;IFNG;IL1B;IL13;TIMP1
Positive Regulation of Gene Expression (GO:0010628)	7/436	8.96e-08	3.31e-06	5.48	0	0	26.5859	431.435	IL10;IL4;IL1A;CNTF;IFNG;IL1B;IL13
Negative Regulation of Apoptotic Process (GO:0043066)	7/475	1.6e-07	5.5e-06	5.26	0	0	24.3218	380.517	IL10;NOTCH2;IL4;CNTF;IL13;PRLR;IL2
Positive Regulation of Cell Population Proliferation (GO:0008284)	7/484	1.82e-07	5.77e-06	5.24	0	0	23.8519	370.126	CD86;IL4;IFNG;IL1B;TIMP1;PRLR;IL2
Cell Surface Receptor Signaling Pathway via STAT (GO:0097696)	1955-04-01	1.92e-07	5.77e-06	5.24	0	0	104.209	1611.49	IL4;CNTF;IFNG;IL2
Regulation of MHC Class II Biosynthetic Process (GO:0045346)	2025-03-15	3.28e-07	9.27e-06	5.03	0	0	312.016	4658.18	IL10;IL4;IFNG
Positive Regulation of T Cell Proliferation (GO:0042102)	1965-04-01	3.8e-07	1.01e-05	4.99	0	0	87.082	1287.45	CD86;IL4;IL1B;IL2
Positive Regulation of Macromolecule Biosynthetic Process (GO:0010557)	6/355	6.69e-07	1.69e-05	4.77	0	0	25.9625	369.115	IL4;IL1A;CNTF;IFNG;IL1B;IL13
Positive Regulation of Lymphocyte Proliferation (GO:0050671)	1977-04-01	7.53e-07	1.81e-05	4.74	0	0	72.7233	1025.32	CD86;IL4;IL1B;IL2
Positive Regulation of Cellular Process (GO:0048522)	7/622	9.9e-07	2.22e-05	4.65	0	0	18.3688	253.966	CD86;IL4;IFNG;IL1B;TIMP1;PRLR;IL2
Regulation of T Cell Proliferation (GO:0042129)	1983-04-01	1.02e-06	2.22e-05	4.65	0	0	67.1797	926.852	CD86;IL10;IL4;IL1B
Positive Regulation of T Cell Cytokine Production (GO:0002726)	2025-03-23	1.27e-06	2.65e-05	4.58	0	0	187.134	2540.36	IL4;IL1R1;IL1B
Negative Regulation of Endothelial Cell Apoptotic Process (GO:2000352)	2025-03-26	1.86e-06	3.58e-05	4.45	0	0	162.701	2146.5	IL10;IL4;IL13
Positive Regulation of Interleukin-2 Production (GO:0032743)	2025-03-26	1.86e-06	3.58e-05	4.45	0	0	162.701	2146.5	CD86;IL1A;IL1B
Apoptotic Process (GO:0006915)	5/232	2.05e-06	3.78e-05	4.42	0	0	31.0793	407.09	IL10;NOTCH2;IL1A;IFNG;IL1B
Regulation of Interleukin-6 Production (GO:0032675)	4/114	3.63e-06	6.25e-05	4.2	0	0	48.1721	603.387	IL10;IL1A;IFNG;IL1B
Inflammatory Response (GO:0006954)	5/261	3.65e-06	6.25e-05	4.2	0	0	27.5181	344.573	IL4;IL1A;IFNG;IL1B;IL13
Regulation of Gene Expression (GO:0010468)	8/1127	4.29e-06	7.1e-05	4.15	0	0	12.259	151.516	IL10;NOTCH2;IL4;IL1A;CNTF;IFNG;IL1B;IL13
Macrophage Activation (GO:0042116)	1935-03-01	4.67e-06	7.47e-05	4.13	0	0	116.889	1434.82	IL4;IFNG;IL13
Cellular Response to Molecule of Bacterial Origin (GO:0071219)	4/123	4.92e-06	7.61e-05	4.12	0	0	44.5087	544.038	CD86;IL10;IL1A;IL1B
Cellular Response to Lipopolysaccharide (GO:0071222)	4/125	5.24e-06	7.86e-05	4.1	0	0	43.7686	532.185	CD86;IL10;IL1A;IL1B
Regulation of Tumor Necrosis Factor Production (GO:0032680)	4/131	6.31e-06	9.18e-05	4.04	0	0	41.6882	499.129	IL10;IL4;IL1A;IFNG
Regulation of Immunoglobulin Mediated Immune Response (GO:0002889)	2025-02-05	8.54e-06	0.000111	3.96	0	0	783.451	9143.89	IL10;IL4
Positive Regulation of Platelet-Derived Growth Factor Receptor Signaling Pathway (GO:0010641)	2025-02-05	8.54e-06	0.000111	3.96	0	0	783.451	9143.89	IL1R1;IL1B
Positive Regulation of T-helper 1 Cell Cytokine Production (GO:2000556)	2025-02-05	8.54e-06	0.000111	3.96	0	0	783.451	9143.89	IL1R1;IL1B
Regulation of T-helper 1 Cell Cytokine Production (GO:2000554)	2025-02-05	8.54e-06	0.000111	3.96	0	0	783.451	9143.89	IL1R1;IL1B
Positive Regulation of Metabolic Process (GO:0009893)	4/147	9.96e-06	0.000124	3.91	0	0	36.9939	426.041	IL4;IFNG;IL13;PRLR
Regulation of B Cell Proliferation (GO:0030888)	1945-03-01	1.01e-05	0.000124	3.91	0	0	89.0134	1024.3	IL10;IL4;IL2
Regulation of Endothelial Cell Apoptotic Process (GO:2000351)	1947-03-01	1.15e-05	0.000134	3.87	0	0	84.9588	966.412	IL10;IL4;IL13
Cell Surface Receptor Signaling Pathway via JAK-STAT (GO:0007259)	1947-03-01	1.15e-05	0.000134	3.87	0	0	84.9588	966.412	IL4;CNTF;IFNG
Regulation of Immature T Cell Proliferation in Thymus (GO:0033084)	2025-02-06	1.28e-05	0.000143	3.85	0	0	587.559	6619.67	IL1A;IL1B
Regulation of Calcidiol 1-Monooxygenase Activity (GO:0060558)	2025-02-06	1.28e-05	0.000143	3.85	0	0	587.559	6619.67	IFNG;IL1B
Regulation of Interleukin-2 Production (GO:0032663)	1950-03-01	1.38e-05	0.000151	3.82	0	0	79.5239	889.656	CD86;IL1A;IL1B
Response to Lipopolysaccharide (GO:0032496)	4/161	1.43e-05	0.000152	3.82	0	0	33.6713	375.686	CD86;IL10;IL1A;IL1B
Positive Regulation of Response to External Stimulus (GO:0032103)	4/163	1.5e-05	0.000156	3.81	0	0	33.2444	369.306	CNTF;IFNG;IL1B;IL2
Negative Regulation of Programmed Cell Death (GO:0043069)	5/382	2.31e-05	0.000236	3.63	0	0	18.5714	198.271	IL10;NOTCH2;IL4;PRLR;IL2
Regulation of B Cell Apoptotic Process (GO:0002902)	2025-02-09	3.07e-05	0.000307	3.51	0	0	335.697	3488.77	IL10;IL2
Positive Regulation of B Cell Differentiation (GO:0045579)	2025-02-11	4.68e-05	0.000449	3.35	0	0	261.072	2602.87	IL10;IL2
Positive Regulation of MHC Class II Biosynthetic Process (GO:0045348)	2025-02-11	4.68e-05	0.000449	3.35	0	0	261.072	2602.87	IL4;IFNG
Lymphocyte Differentiation (GO:0030098)	1976-03-01	4.89e-05	0.00046	3.34	0	0	51.1336	507.533	IL10;IL4;IL2
Positive Regulation of Interleukin-6 Production (GO:0032755)	1977-03-01	5.09e-05	0.000469	3.33	0	0	50.44	498.675	IL1A;IFNG;IL1B
Astrocyte Activation (GO:0048143)	2025-02-12	5.61e-05	0.000499	3.3	0	0	234.953	2299.76	CNTF;IFNG
Positive Regulation of T-helper 1 Type Immune Response (GO:0002827)	2025-02-12	5.61e-05	0.000499	3.3	0	0	234.953	2299.76	IL1R1;IL1B
Cellular Response to Lipid (GO:0071396)	4/234	6.17e-05	0.000538	3.27	0	0	22.8997	221.989	CD86;IL10;IL1A;IL1B
Positive Regulation of Heterotypic Cell-Cell Adhesion (GO:0034116)	2025-02-13	6.63e-05	0.000548	3.26	0	0	213.583	2055.03	IL10;IL1B
Positive Regulation of Type 2 Immune Response (GO:0002830)	2025-02-13	6.63e-05	0.000548	3.26	0	0	213.583	2055.03	CD86;IL4
Positive Regulation of Cellular Respiration (GO:1901857)	2025-02-13	6.63e-05	0.000548	3.26	0	0	213.583	2055.03	IL4;IFNG
Positive Regulation of Tumor Necrosis Factor Superfamily Cytokine Production (GO:1903557)	1985-03-01	6.83e-05	0.000556	3.25	0	0	45.5008	436.398	CD86;IL1A;IFNG
Regulation of Platelet-Derived Growth Factor Receptor Signaling Pathway (GO:0010640)	2025-02-14	7.73e-05	0.000618	3.21	0	0	195.775	1853.61	IL1R1;IL1B
Negative Regulation of Epithelial Cell Differentiation (GO:0030857)	2025-02-15	8.91e-05	0.000658	3.18	0	0	180.706	1685.18	IFNG;IL13
Positive Regulation of Membrane Protein Ectodomain Proteolysis (GO:0051044)	2025-02-15	8.91e-05	0.000658	3.18	0	0	180.706	1685.18	IFNG;IL1B
Regulation of Isotype Switching (GO:0045191)	2025-02-15	8.91e-05	0.000658	3.18	0	0	180.706	1685.18	IL10;IL4
Astrocyte Development (GO:0014002)	2025-02-15	8.91e-05	0.000658	3.18	0	0	180.706	1685.18	CNTF;IFNG
Regulation of Amyloid-Beta Clearance (GO:1900221)	2025-02-15	8.91e-05	0.000658	3.18	0	0	180.706	1685.18	IL4;IFNG
Positive Regulation of Immune Response (GO:0050778)	1995-03-01	9.52e-05	0.000692	3.16	0	0	40.5346	375.332	IL10;IFNG;IL2
B Cell Activation (GO:0042113)	1996-03-01	9.82e-05	0.000704	3.15	0	0	40.0968	370.029	CD86;IL10;IL4
Positive Regulation of DNA-templated Transcription (GO:0045893)	7/1274	0.000107	0.000738	3.13	0	0	8.61602	78.7849	CD86;IL10;NOTCH2;IL4;IFNG;IL1B;IL13
Regulation of Protein Secretion (GO:0050708)	1999-03-01	0.000108	0.000738	3.13	0	0	38.8379	354.859	IL1A;IFNG;IL1B
Positive Regulation of Cold-Induced Thermogenesis (GO:0120162)	1999-03-01	0.000108	0.000738	3.13	0	0	38.8379	354.859	IL4;IL13;PRLR
Regulation of Cellular Respiration (GO:0043457)	2025-02-18	0.00013	0.000876	3.06	0	0	146.801	1313.99	IL4;IFNG
Positive Regulation of Signaling Receptor Activity (GO:2000273)	2025-02-19	0.000145	0.000965	3.02	0	0	138.159	1221.34	IL10;IFNG
Positive Regulation of T Cell Activation (GO:0050870)	3/111	0.000151	0.000994	3	0	0	34.5017	303.531	CD86;IL4;IL1B
Positive Regulation of Monooxygenase Activity (GO:0032770)	2025-02-20	0.000161	0.00102914	2.99	0	0	130.477	1139.76	IFNG;IL1B
Interleukin-1-Mediated Signaling Pathway (GO:0070498)	2025-02-20	0.000161	0.00102914	2.99	0	0	130.477	1139.76	IL1R1;IL1B
T Cell Activation (GO:0042110)	3/114	0.000164	0.0010327	2.99	0	0	33.5642	292.634	CD86;IL4;IL2
Positive Regulation of Inflammatory Response (GO:0050729)	3/115	0.000168	0.00104597	2.98	0	0	33.2628	289.147	IFNG;IL1B;IL2
Regulation of Neuroinflammatory Response (GO:0150077)	2025-02-21	0.000178	0.00109311	2.96	0	0	123.604	1067.42	IL4;IL1B
Negative Regulation of Defense Response (GO:0031348)	3/121	0.000195	0.00117	2.93	0	0	31.562	269.618	IL10;IL4;IL13
Negative Regulation of Inflammatory Response (GO:0050728)	3/121	0.000195	0.00117	2.93	0	0	31.562	269.618	IL10;IL4;IL13
Response to Cytokine (GO:0034097)	3/123	0.000205	0.00121285	2.92	0	0	31.0328	263.596	IL1R1;IL1B;TIMP1
Regulation of Heterotypic Cell-Cell Adhesion (GO:0034114)	2025-02-23	0.000214	0.0012362	2.91	0	0	111.821	944.959	IL10;IL1B
Positive Regulation of Tyrosine Phosphorylation of STAT Protein (GO:0042531)	2025-02-23	0.000214	0.0012362	2.91	0	0	111.821	944.959	CNTF;IFNG
Negative Regulation of Extrinsic Apoptotic Signaling Pathway in Absence of Ligand (GO:2001240)	2025-02-24	0.000233	0.0013161	2.88	0	0	106.733	892.735	IL1A;IL1B
Negative Regulation of Signal Transduction in Absence of Ligand (GO:1901099)	2025-02-24	0.000233	0.0013161	2.88	0	0	106.733	892.735	IL1A;IL1B
Positive Regulation of Defense Response (GO:0031349)	3/130	0.000241	0.00134482	2.87	0	0	29.312	244.196	IFNG;IL1B;IL2
Regulation of B Cell Activation (GO:0050864)	2025-02-25	0.000253	0.00139687	2.85	0	0	102.087	845.423	IL10;IL4
Positive Regulation of Nuclear Division (GO:0051785)	2025-02-26	0.000274	0.00149523	2.83	0	0	97.8284	802.381	IL1A;IL1B
Positive Regulation of Vascular Endothelial Growth Factor Production (GO:0010575)	2025-02-27	0.000296	0.00159581	2.8	0	0	93.9106	763.073	IL1A;IL1B
Regulation of Extrinsic Apoptotic Signaling Pathway in Absence of Ligand (GO:2001239)	2025-02-28	0.000318	0.00166158	2.78	0	0	90.2941	727.047	IL1A;IL1B
Regulation of Tyrosine Phosphorylation of STAT Protein (GO:0042509)	2025-02-28	0.000318	0.00166158	2.78	0	0	90.2941	727.047	CNTF;IFNG
Positive Regulation of ATP Metabolic Process (GO:1903580)	2025-02-28	0.000318	0.00166158	2.78	0	0	90.2941	727.047	IL4;IFNG
Regulation of Vascular Endothelial Growth Factor Production (GO:0010574)	2029-02-01	0.000342	0.00176447	2.75	0	0	86.9455	693.92	IL1A;IL1B
Regulation of Cold-Induced Thermogenesis (GO:0120161)	3/148	0.000353	0.00180107	2.74	0	0	25.65	203.914	IL4;IL13;PRLR
Positive Regulation of Interleukin-10 Production (GO:0032733)	1930-02-01	0.000366	0.00181152	2.74	0	0	83.8361	663.367	IL4;IL13
Positive Regulation of Nitric Oxide Biosynthetic Process (GO:0045429)	1930-02-01	0.000366	0.00181152	2.74	0	0	83.8361	663.367	IFNG;IL1B
Positive Regulation of B Cell Proliferation (GO:0030890)	1930-02-01	0.000366	0.00181152	2.74	0	0	83.8361	663.367	IL4;IL2
Positive Regulation of Nitric Oxide Metabolic Process (GO:1904407)	1931-02-01	0.000391	0.00190204	2.72	0	0	80.9412	635.108	IFNG;IL1B
Negative Regulation of Cell Population Proliferation (GO:0008285)	4/379	0.000393	0.00190204	2.72	0	0	13.942	109.342	IL10;IL1A;IFNG;IL1B
Negative Regulation of Response to External Stimulus (GO:0032102)	3/154	0.000396	0.00190204	2.72	0	0	24.6233	192.886	IL10;IL4;IL13
Regulation of Apoptotic Process (GO:0042981)	5/704	0.000411	0.00194165	2.71	0	0	9.85183	76.8223	IL10;NOTCH2;IL4;PRLR;IL2
Cellular Response to Oxygen-Containing Compound (GO:1901701)	4/384	0.000413	0.00194165	2.71	0	0	13.7551	107.194	CD86;IL10;IL1A;IL1B
Positive Regulation of Mitotic Nuclear Division (GO:0045840)	1935-02-01	0.000499	0.00230452	2.64	0	0	71.1159	540.643	IL1A;IL1B
Regulation of Interleukin-17 Production (GO:0032660)	1935-02-01	0.000499	0.00230452	2.64	0	0	71.1159	540.643	IFNG;IL2
Negative Regulation of Smooth Muscle Cell Proliferation (GO:0048662)	1936-02-01	0.000528	0.00241547	2.62	0	0	69.0208	520.809	IL10;IFNG
Regulation of Cytokine Production (GO:0001817)	3/172	0.000547	0.00247822	2.61	0	0	21.9808	165.088	IL10;IL1A;IFNG
Positive Regulation of Receptor Signaling Pathway via JAK-STAT (GO:0046427)	1938-02-01	0.000589	0.00264199	2.58	0	0	65.1797	484.753	IL10;PRLR
Negative Regulation of T Cell Proliferation (GO:0042130)	1939-02-01	0.00062	0.00275745	2.56	0	0	63.4149	468.326	CD86;IL10
Negative Regulation of Proteolysis (GO:0045861)	1940-02-01	0.000653	0.0028482	2.55	0	0	61.743	452.847	IL10;TIMP1
Regulation of DNA Recombination (GO:0000018)	1940-02-01	0.000653	0.0028482	2.55	0	0	61.743	452.847	IL10;IL4
Regulation of Epithelial Cell Migration (GO:0010632)	1943-02-01	0.000754	0.00323296	2.49	0	0	57.2166	411.367	IL4;IFNG
Negative Regulation of Lymphocyte Proliferation (GO:0050672)	1943-02-01	0.000754	0.00323296	2.49	0	0	57.2166	411.367	CD86;IL10
Regulation of Nitric Oxide Biosynthetic Process (GO:0045428)	1945-02-01	0.000826	0.0035091	2.45	0	0	54.5499	387.239	IFNG;IL1B
Regulation of Interleukin-10 Production (GO:0032653)	1946-02-01	0.000863	0.00354118	2.45	0	0	53.3075	376.079	IL4;IL13
Positive Regulation of Nucleocytoplasmic Transport (GO:0046824)	1946-02-01	0.000863	0.00354118	2.45	0	0	53.3075	376.079	IFNG;IL1B
Regulation of Osteoclast Differentiation (GO:0045670)	1946-02-01	0.000863	0.00354118	2.45	0	0	53.3075	376.079	IL4;IFNG
Mononuclear Cell Differentiation (GO:1903131)	1946-02-01	0.000863	0.00354118	2.45	0	0	53.3075	376.079	IL4;IFNG
Negative Regulation of Macromolecule Biosynthetic Process (GO:0010558)	3/202	0.000873	0.003551	2.45	0	0	18.6388	131.285	IL10;NOTCH2;IFNG
Positive Regulation of Canonical NF-kappaB Signal Transduction (GO:0043123)	3/204	0.000898	0.00360406	2.44	0	0	18.4515	129.44	IL1A;IL1R1;IL1B
Positive Regulation of miRNA Transcription (GO:1902895)	1947-02-01	0.000901	0.00360406	2.44	0	0	52.1203	365.467	IL10;NOTCH2
Negative Regulation of Tumor Necrosis Factor Production (GO:0032720)	1948-02-01	0.00094	0.00372757	2.43	0	0	50.9847	355.363	IL10;IL4
Regulation of Interleukin-12 Production (GO:0032655)	1950-02-01	0.00101931	0.00391415	2.41	0	0	48.8554	336.547	IL10;IFNG
Positive Regulation of Non-Canonical NF-kappaB Signal Transduction (GO:1901224)	1950-02-01	0.00101931	0.00391415	2.41	0	0	48.8554	336.547	CD86;IL1B
Negative Regulation of Tumor Necrosis Factor Superfamily Cytokine Production (GO:1903556)	1950-02-01	0.00101931	0.00391415	2.41	0	0	48.8554	336.547	IL10;IL4
Positive Regulation of Cell-Cell Adhesion (GO:0022409)	1950-02-01	0.00101931	0.00391415	2.41	0	0	48.8554	336.547	IL10;IL1B
Negative Regulation of T Cell Activation (GO:0050868)	1951-02-01	0.00106031	0.00403929	2.39	0	0	47.8559	327.774	CD86;IL10
Positive Regulation of Proteolysis (GO:0045862)	1952-02-01	0.0011021	0.00416543	2.38	0	0	46.8965	319.39	IFNG;IL1B
B Cell Differentiation (GO:0030183)	1953-02-01	0.00114467	0.00419423	2.38	0	0	45.9746	311.369	IL10;IL4
Positive Regulation of miRNA Metabolic Process (GO:2000630)	1953-02-01	0.00114467	0.00419423	2.38	0	0	45.9746	311.369	IL10;NOTCH2
Negative Regulation of Protein Catabolic Process (GO:0042177)	1953-02-01	0.00114467	0.00419423	2.38	0	0	45.9746	311.369	IL10;TIMP1
Positive Regulation of B Cell Activation (GO:0050871)	1953-02-01	0.00114467	0.00419423	2.38	0	0	45.9746	311.369	IL4;IL2
Regulation of ERK1 and ERK2 Cascade (GO:0070372)	3/223	0.00116143	0.00422336	2.37	0	0	16.8418	113.818	NOTCH2;IL1A;IL1B
Positive Regulation of Chemokine Production (GO:0032722)	1954-02-01	0.00118803	0.00428762	2.37	0	0	45.0882	303.69	IFNG;IL1B
Regulation of Peptide Hormone Secretion (GO:0090276)	1955-02-01	0.00123216	0.00441372	2.36	0	0	44.2353	296.332	IFNG;IL1B
Cellular Response to Interleukin-1 (GO:0071347)	1957-02-01	0.00132277	0.00470317	2.33	0	0	42.6225	282.503	IL1R1;IL1B
Regulation of Mitotic Nuclear Division (GO:0007088)	1958-02-01	0.00136923	0.00479731	2.32	0	0	41.8592	275.999	IL1A;IL1B
Positive Regulation of Type II Interferon Production (GO:0032729)	1958-02-01	0.00136923	0.00479731	2.32	0	0	41.8592	275.999	IL1R1;IL1B
Response to Interleukin-1 (GO:0070555)	1959-02-01	0.00141647	0.00492687	2.31	0	0	41.1228	269.749	IL1R1;IL1B
Positive Regulation of Peptidyl-Tyrosine Phosphorylation (GO:0050731)	1963-02-01	0.00161316	0.00557064	2.25	0	0	38.4185	247.014	CNTF;IFNG
Positive Regulation of RNA Biosynthetic Process (GO:1902680)	4/555	0.00163148	0.00559365	2.25	0	0	9.40351	60.3542	CD86;IL10;IL4;IL1B
Regulation of miRNA Transcription (GO:1902893)	1966-02-01	0.00176875	0.00597888	2.22	0	0	36.6121	232.029	IL10;NOTCH2
Regulation of Neurogenesis (GO:0050767)	1966-02-01	0.00176875	0.00597888	2.22	0	0	36.6121	232.029	IFNG;IL1B
Response to Molecule of Bacterial Origin (GO:0002237)	1967-02-01	0.00182214	0.00611629	2.21	0	0	36.0471	227.376	IL10;IL1B
Positive Regulation of Intracellular Protein Transport (GO:0090316)	1969-02-01	0.00193122	0.00643739	2.19	0	0	34.9675	218.533	IFNG;IL1B
Regulation of Canonical NF-kappaB Signal Transduction (GO:0043122)	3/270	0.00200884	0.00664994	2.18	0	0	13.8441	85.9746	IL1A;IL1R1;IL1B
Negative Regulation of Extrinsic Apoptotic Signaling Pathway (GO:2001237)	1972-02-01	0.00210052	0.00690582	2.16	0	0	33.4639	206.324	IL1A;IL1B
Myeloid Leukocyte Differentiation (GO:0002573)	1974-02-01	0.00221717	0.00723975	2.14	0	0	32.531	198.814	IL4;IFNG
Positive Regulation of Secretion by Cell (GO:1903532)	1975-02-01	0.00227663	0.00738367	2.13	0	0	32.0838	195.232	IL1A;IL1B
Regulation of Non-Canonical NF-kappaB Signal Transduction (GO:1901222)	1977-02-01	0.0023978	0.00772445	2.11	0	0	31.2251	188.387	CD86;IL1B
Cellular Response to Cytokine Stimulus (GO:0071345)	3/289	0.00243733	0.00779947	2.11	0	0	12.9119	77.6892	IL1A;IL1B;PRLR
Positive Regulation of Tumor Necrosis Factor Production (GO:0032760)	1982-02-01	0.00271381	0.00862669	2.06	0	0	29.2662	172.946	IL1A;IFNG
Regulation of Interleukin-8 Production (GO:0032677)	1983-02-01	0.00277925	0.00877658	2.06	0	0	28.9034	170.113	IL10;IL1B
Positive Regulation of Endocytosis (GO:0045807)	1985-02-01	0.00291235	0.00913677	2.04	0	0	28.2041	164.678	IL4;IFNG
Positive Regulation of Intracellular Signal Transduction (GO:1902533)	4/652	0.00293486	0.00914762	2.04	0	0	7.95597	46.392	CD86;IL1A;IL1R1;IL1B
Positive Regulation of Biosynthetic Process (GO:0009891)	1987-02-01	0.0030484	0.0094402	2.03	0	0	27.5377	159.53	IFNG;IL1B
Regulation of Type II Interferon Production (GO:0032649)	1988-02-01	0.00311753	0.00959239	2.02	0	0	27.2161	157.057	IL1R1;IL1B
Regulation of Insulin Secretion (GO:0050796)	1993-02-01	0.00347418	0.0106217	1.97	0	0	25.7143	145.605	IFNG;IL1B
Positive Regulation of Protein Catabolic Process (GO:0045732)	1999-02-01	0.00392618	0.0118526	1.93	0	0	24.1164	133.607	IFNG;IL1B
Positive Regulation of Autophagy (GO:0010508)	1999-02-01	0.00392618	0.0118526	1.93	0	0	24.1164	133.607	IL4;IFNG
Positive Regulation of Cell Migration (GO:0030335)	3/344	0.00398375	0.0119512	1.92	0	0	10.7991	59.6709	IL4;IFNG;IL1B
Hemopoiesis (GO:0030097)	2/101	0.00408263	0.0121718	1.91	0	0	23.6269	129.972	IL10;NOTCH2
Negative Regulation of Gene Expression (GO:0010629)	3/364	0.00466573	0.0133875	1.87	0	0	10.1904	54.6973	IL10;NOTCH2;IFNG
Positive Regulation of Vasculature Development (GO:1904018)	2/109	0.00473703	0.0133875	1.87	0	0	21.8516	116.957	IL1A;IL1B
Activation of Transmembrane Receptor Protein Tyrosine Kinase Activity (GO:0007171)	2025-01-05	0.00474139	0.0133875	1.87	0	0	277.458	1484.8	PRLR
Hyaluronan Biosynthetic Process (GO:0030213)	2025-01-05	0.00474139	0.0133875	1.87	0	0	277.458	1484.8	IL1B
Negative Regulation of Trophoblast Cell Migration (GO:1901164)	2025-01-05	0.00474139	0.0133875	1.87	0	0	277.458	1484.8	TIMP1
Positive Regulation of Unsaturated Fatty Acid Biosynthetic Process (GO:2001280)	2025-01-05	0.00474139	0.0133875	1.87	0	0	277.458	1484.8	IL1B
Regulation of Prostaglandin Biosynthetic Process (GO:0031392)	2025-01-05	0.00474139	0.0133875	1.87	0	0	277.458	1484.8	IL1B
Regulation of Vitamin D Biosynthetic Process (GO:0060556)	2025-01-05	0.00474139	0.0133875	1.87	0	0	277.458	1484.8	IFNG
+ Reg of CD4-+, CD25-+, Alpha-Beta Regulatory T Cell Differentiation (GO:0032831)	2025-01-05	0.00474139	0.0133875	1.87	0	0	277.458	1484.8	IFNG
Positive Regulation of Cellular Component Organization (GO:0051130)	2/111	0.00490774	0.0137761	1.86	0	0	21.4485	114.04	IFNG;IL1B
Positive Regulation of Cell Cycle Process (GO:0090068)	2/119	0.00561866	0.0149788	1.82	0	0	19.9739	103.498	IL1A;IL1B
Positive Regulation of Humoral Immune Response (GO:0002922)	2025-01-06	0.00568712	0.0149788	1.82	0	0	221.956	1147.41	IL1B
Positive Regulation of Icosanoid Secretion (GO:0032305)	2025-01-06	0.00568712	0.0149788	1.82	0	0	221.956	1147.41	IL1B
Positive Regulation of Interleukin-23 Production (GO:0032747)	2025-01-06	0.00568712	0.0149788	1.82	0	0	221.956	1147.41	IFNG
Negative Regulation of Membrane Protein Ectodomain Proteolysis (GO:0051045)	2025-01-06	0.00568712	0.0149788	1.82	0	0	221.956	1147.41	TIMP1
Positive Regulation of Muscle Cell Apoptotic Process (GO:0010661)	2025-01-06	0.00568712	0.0149788	1.82	0	0	221.956	1147.41	IFNG
Regulation of Osteoclast Development (GO:2001204)	2025-01-06	0.00568712	0.0149788	1.82	0	0	221.956	1147.41	NOTCH2
Marginal Zone B Cell Differentiation (GO:0002315)	2025-01-06	0.00568712	0.0149788	1.82	0	0	221.956	1147.41	NOTCH2
Positive Regulation of Amyloid-Beta Clearance (GO:1900223)	2025-01-06	0.00568712	0.0149788	1.82	0	0	221.956	1147.41	IL4
Regulation of Adiponectin Secretion (GO:0070163)	2025-01-06	0.00568712	0.0149788	1.82	0	0	221.956	1147.41	IL1B
Regulation of Cell Adhesion Molecule Production (GO:0060353)	2025-01-06	0.00568712	0.0149788	1.82	0	0	221.956	1147.41	IL1B
Negative Regulation of Catabolic Process (GO:0009895)	2/120	0.00571067	0.0149788	1.82	0	0	19.8036	102.294	IL10;IL1B
Positive Regulation of Angiogenesis (GO:0045766)	2/126	0.00627724	0.0163249	1.79	0	0	18.8397	95.5326	IL1A;IL1B
Positive Regulation of Lymphocyte Apoptotic Process (GO:0070230)	2025-01-07	0.00663199	0.0163249	1.79	0	0	184.954	927.7	IL10
Positive Regulation of Monocyte Chemotactic Protein-1 Production (GO:0071639)	2025-01-07	0.00663199	0.0163249	1.79	0	0	184.954	927.7	IL1B
Positive Regulation of Phosphatase Activity (GO:0010922)	2025-01-07	0.00663199	0.0163249	1.79	0	0	184.954	927.7	IFNG
Positive Regulation of Smooth Muscle Cell Differentiation (GO:0051152)	2025-01-07	0.00663199	0.0163249	1.79	0	0	184.954	927.7	NOTCH2
Positive Regulation of Steroid Biosynthetic Process (GO:0010893)	2025-01-07	0.00663199	0.0163249	1.79	0	0	184.954	927.7	IFNG
Leukocyte Aggregation (GO:0070486)	2025-01-07	0.00663199	0.0163249	1.79	0	0	184.954	927.7	IL1B
Positive Regulation of ATP Biosynthetic Process (GO:2001171)	2025-01-07	0.00663199	0.0163249	1.79	0	0	184.954	927.7	IL4
Positive Regulation of T-helper 2 Cell Cytokine Production (GO:2000553)	2025-01-07	0.00663199	0.0163249	1.79	0	0	184.954	927.7	IL4
Regulation of T-helper 2 Cell Differentiation (GO:0045628)	2025-01-07	0.00663199	0.0163249	1.79	0	0	184.954	927.7	CD86
Negative Regulation of B Cell Apoptotic Process (GO:0002903)	2025-01-07	0.00663199	0.0163249	1.79	0	0	184.954	927.7	IL2
Negative Regulation of Amyloid-Beta Clearance (GO:1900222)	2025-01-07	0.00663199	0.0163249	1.79	0	0	184.954	927.7	IFNG
Regulation of Endothelial Cell Development (GO:1901550)	2025-01-08	0.00757601	0.0179137	1.75	0	0	158.524	774.035	IL1B
Regulation of Gap Junction Assembly (GO:1903596)	2025-01-08	0.00757601	0.0179137	1.75	0	0	158.524	774.035	IL1B
Regulation of Glial Cell Proliferation (GO:0060251)	2025-01-08	0.00757601	0.0179137	1.75	0	0	158.524	774.035	IL1B
Regulation of Interleukin-23 Production (GO:0032667)	2025-01-08	0.00757601	0.0179137	1.75	0	0	158.524	774.035	IFNG
Negative Regulation of Production of Molecular Mediator of Immune Response (GO:0002701)	2025-01-08	0.00757601	0.0179137	1.75	0	0	158.524	774.035	IL10
Regulation of Response to Wounding (GO:1903034)	2025-01-08	0.00757601	0.0179137	1.75	0	0	158.524	774.035	IL10
Regulation of Cell Killing (GO:0031341)	2025-01-08	0.00757601	0.0179137	1.75	0	0	158.524	774.035	IL10
Regulation of Chemokine (C-C Motif) Ligand 5 Production (GO:0071649)	2025-01-08	0.00757601	0.0179137	1.75	0	0	158.524	774.035	IL10
Negative Regulation of Heterotypic Cell-Cell Adhesion (GO:0034115)	2025-01-09	0.00851919	0.0191982	1.72	0	0	138.701	660.972	IL10
Negative Regulation of Hormone Secretion (GO:0046888)	2025-01-09	0.00851919	0.0191982	1.72	0	0	138.701	660.972	IL1B
Negative Regulation of Lymphocyte Apoptotic Process (GO:0070229)	2025-01-09	0.00851919	0.0191982	1.72	0	0	138.701	660.972	IL2
Regulation of Interleukin-18 Production (GO:0032661)	2025-01-09	0.00851919	0.0191982	1.72	0	0	138.701	660.972	IL10
Negative Regulation of Receptor Binding (GO:1900121)	2025-01-09	0.00851919	0.0191982	1.72	0	0	138.701	660.972	IL10
Positive Regulation of Purine Nucleotide Biosynthetic Process (GO:1900373)	2025-01-09	0.00851919	0.0191982	1.72	0	0	138.701	660.972	IL4
Positive Regulation of Tissue Remodeling (GO:0034105)	2025-01-09	0.00851919	0.0191982	1.72	0	0	138.701	660.972	IL2
Regulation of NMDA Receptor Activity (GO:2000310)	2025-01-09	0.00851919	0.0191982	1.72	0	0	138.701	660.972	IFNG
Myeloid Dendritic Cell Differentiation (GO:0043011)	2025-01-09	0.00851919	0.0191982	1.72	0	0	138.701	660.972	IL4
Regulation of Cell-Cell Adhesion Involved in Gastrulation (GO:0070587)	2025-01-09	0.00851919	0.0191982	1.72	0	0	138.701	660.972	IL10
Positive Regulation of ERK1 and ERK2 Cascade (GO:0070374)	2/153	0.00912868	0.0202747	1.69	0	0	15.4499	72.5581	NOTCH2;IL1B
Regulation of Complement Activation (GO:0030449)	2025-01-10	0.00946151	0.0202747	1.69	0	0	123.284	574.568	IL1B
Positive Regulation of Interleukin-13 Production (GO:0032736)	2025-01-10	0.00946151	0.0202747	1.69	0	0	123.284	574.568	IL4
Negative Regulation of Interleukin-17 Production (GO:0032700)	2025-01-10	0.00946151	0.0202747	1.69	0	0	123.284	574.568	IFNG
Type II Interferon-Mediated Signaling Pathway (GO:0060333)	2025-01-10	0.00946151	0.0202747	1.69	0	0	123.284	574.568	IFNG
Regulation of Monocyte Chemotactic Protein-1 Production (GO:0071637)	2025-01-10	0.00946151	0.0202747	1.69	0	0	123.284	574.568	IL1B
Atrial Septum Morphogenesis (GO:0060413)	2025-01-10	0.00946151	0.0202747	1.69	0	0	123.284	574.568	NOTCH2
Cellular Response to UV-A (GO:0071492)	2025-01-10	0.00946151	0.0202747	1.69	0	0	123.284	574.568	TIMP1
Response to Corticosteroid (GO:0031960)	2025-01-10	0.00946151	0.0202747	1.69	0	0	123.284	574.568	IL10
Regulation of T-helper 2 Cell Cytokine Production (GO:2000551)	2025-01-10	0.00946151	0.0202747	1.69	0	0	123.284	574.568	IL4
Negative Regulation of B Cell Proliferation (GO:0030889)	2025-01-10	0.00946151	0.0202747	1.69	0	0	123.284	574.568	IL10
+ Reg of Phosphatidylinositol 3-Kinase/Prot Kinase B Signal Transduction (GO:0051897)	2/162	0.0101862	0.0215234	1.67	0	0	14.5743	66.8482	IL1R1;IL1B
Positive Regulation of Smooth Muscle Cell Apoptotic Process (GO:0034393)	2025-01-11	0.010403	0.0215234	1.67	0	0	110.95	506.56	IFNG
Positive Regulation of Vascular Endothelial Growth Factor Receptor Signaling Pathway (GO:0030949)	2025-01-11	0.010403	0.0215234	1.67	0	0	110.95	506.56	IL1B
Regulation of Smooth Muscle Cell Differentiation (GO:0051150)	2025-01-11	0.010403	0.0215234	1.67	0	0	110.95	506.56	NOTCH2
Macrophage Activation Involved in Immune Response (GO:0002281)	2025-01-11	0.010403	0.0215234	1.67	0	0	110.95	506.56	IFNG
Regulation of T Cell Mediated Immunity (GO:0002709)	2025-01-11	0.010403	0.0215234	1.67	0	0	110.95	506.56	IL1B
Negative Regulation of D-glucose Transmembrane Transport (GO:0010829)	2025-01-11	0.010403	0.0215234	1.67	0	0	110.95	506.56	IL1B
Regulation of Axon Regeneration (GO:0048679)	2025-01-11	0.010403	0.0215234	1.67	0	0	110.95	506.56	CNTF
Positive Regulation of Granulocyte Macrophage Colony-Stimulating Factor Production (GO:0032725)	2025-01-12	0.0113436	0.0227822	1.64	0	0	100.859	451.756	IL1B
Positive Regulation of Keratinocyte Proliferation (GO:0010838)	2025-01-12	0.0113436	0.0227822	1.64	0	0	100.859	451.756	NOTCH2
Positive Regulation of Neuroinflammatory Response (GO:0150078)	2025-01-12	0.0113436	0.0227822	1.64	0	0	100.859	451.756	IL1B
Negative Regulation of Transmembrane Transport (GO:0034763)	2025-01-12	0.0113436	0.0227822	1.64	0	0	100.859	451.756	IL1B
Regulation of Response to Stress (GO:0080134)	2025-01-12	0.0113436	0.0227822	1.64	0	0	100.859	451.756	IL10
Regulation of ATP Biosynthetic Process (GO:2001169)	2025-01-12	0.0113436	0.0227822	1.64	0	0	100.859	451.756	IL4
Positive Regulation of T-helper Cell Differentiation (GO:0045624)	2025-01-12	0.0113436	0.0227822	1.64	0	0	100.859	451.756	CD86
Positive Regulation of DNA-binding Transcription Factor Activity (GO:0051091)	2/174	0.0116769	0.0233538	1.63	0	0	13.5492	60.2961	IL10;IL1B
Negative Regulation of Interleukin-12 Production (GO:0032695)	2025-01-13	0.0122834	0.0235841	1.63	0	0	92.4491	406.73	IL10
Regulation of Hemopoiesis (GO:1903706)	2025-01-13	0.0122834	0.0235841	1.63	0	0	92.4491	406.73	NOTCH2
Positive Regulation of Protein Export From Nucleus (GO:0046827)	2025-01-13	0.0122834	0.0235841	1.63	0	0	92.4491	406.73	IL1B
Hyaluronan Metabolic Process (GO:0030212)	2025-01-13	0.0122834	0.0235841	1.63	0	0	92.4491	406.73	IL1B
Atrial Septum Development (GO:0003283)	2025-01-13	0.0122834	0.0235841	1.63	0	0	92.4491	406.73	NOTCH2
Mature B Cell Differentiation Involved in Immune Response (GO:0002313)	2025-01-13	0.0122834	0.0235841	1.63	0	0	92.4491	406.73	NOTCH2
Cellular Response to Interleukin-4 (GO:0071353)	2025-01-13	0.0122834	0.0235841	1.63	0	0	92.4491	406.73	IL4
Response to UV-A (GO:0070141)	2025-01-13	0.0122834	0.0235841	1.63	0	0	92.4491	406.73	TIMP1
Positive Regulation of Ras Protein Signal Transduction (GO:0046579)	2025-01-13	0.0122834	0.0235841	1.63	0	0	92.4491	406.73	NOTCH2
Myeloid Dendritic Cell Activation (GO:0001773)	2025-01-13	0.0122834	0.0235841	1.63	0	0	92.4491	406.73	IL4
Positive Regulation of Transcription by RNA Polymerase II (GO:0045944)	4/983	0.0124413	0.023792	1.62	0	0	5.17589	22.7053	NOTCH2;IL4;IFNG;IL13
Positive Regulation of Catabolic Process (GO:0009896)	2/183	0.0128544	0.0242241	1.62	0	0	12.8697	56.0354	IFNG;IL1B
Negative Regulation of Cell Migration (GO:0030336)	2/184	0.0129884	0.0242241	1.62	0	0	12.7983	55.5921	IL4;TIMP1
Negative Regulation of Cellular Process (GO:0048523)	3/531	0.0131384	0.0242241	1.62	0	0	6.90803	29.9271	IL10;IL1A;IL1B
Negative Regulation of Epithelial Cell Migration (GO:0010633)	2025-01-14	0.0132223	0.0242241	1.62	0	0	85.3333	369.139	IL4
Positive Regulation of Isotype Switching (GO:0045830)	2025-01-14	0.0132223	0.0242241	1.62	0	0	85.3333	369.139	IL4
Regulation of Granulocyte Macrophage Colony-Stimulating Factor Production (GO:0032645)	2025-01-14	0.0132223	0.0242241	1.62	0	0	85.3333	369.139	IL1B
Negative Regulation of Neuroinflammatory Response (GO:0150079)	2025-01-14	0.0132223	0.0242241	1.62	0	0	85.3333	369.139	IL4
Regulation of Trophoblast Cell Migration (GO:1901163)	2025-01-14	0.0132223	0.0242241	1.62	0	0	85.3333	369.139	TIMP1
Positive Regulation of Acute Inflammatory Response (GO:0002675)	2025-01-14	0.0132223	0.0242241	1.62	0	0	85.3333	369.139	IL1B
+ Reg of Adaptive Imm Resp Based on Som Recomb of Imm Rcptrs Built Frm IgSF Domains (GO:0002824)	2025-01-14	0.0132223	0.0242241	1.62	0	0	85.3333	369.139	IL1B
Positive Regulation of Exosomal Secretion (GO:1903543)	2025-01-14	0.0132223	0.0242241	1.62	0	0	85.3333	369.139	IFNG
Negative Regulation of Cytokine Production (GO:0001818)	2/191	0.0139431	0.0254476	1.59	0	0	12.32	52.6403	IL10;IFNG
Regulation of Interleukin-13 Production (GO:0032656)	2025-01-15	0.0141604	0.0255526	1.59	0	0	79.2341	337.324	IL4
Regulation of Nitric-Oxide Synthase Activity (GO:0050999)	2025-01-15	0.0141604	0.0255526	1.59	0	0	79.2341	337.324	IL1B
Regulation of Phosphate Metabolic Process (GO:0019220)	2025-01-15	0.0141604	0.0255526	1.59	0	0	79.2341	337.324	IL4
Negative Regulation of Cytokine Production Involved in Immune Response (GO:0002719)	2025-01-16	0.0150977	0.0266429	1.57	0	0	73.9481	310.08	IL10
Regulation of Establishment of Endothelial Barrier (GO:1903140)	2025-01-16	0.0150977	0.0266429	1.57	0	0	73.9481	310.08	IL1B
Negative Regulation of Interleukin-8 Production (GO:0032717)	2025-01-16	0.0150977	0.0266429	1.57	0	0	73.9481	310.08	IL10
Regulation of Interleukin-1 Production (GO:0032652)	2025-01-16	0.0150977	0.0266429	1.57	0	0	73.9481	310.08	IL10
Negative Regulation of Synaptic Transmission (GO:0050805)	2025-01-16	0.0150977	0.0266429	1.57	0	0	73.9481	310.08	IL1B
Regulation of Smooth Muscle Cell Apoptotic Process (GO:0034391)	2025-01-16	0.0150977	0.0266429	1.57	0	0	73.9481	310.08	IFNG
Positive Regulation of Protein Metabolic Process (GO:0051247)	2/202	0.0155036	0.027259	1.56	0	0	11.6359	48.4831	CD86;IL1B
B Cell Proliferation (GO:0042100)	2025-01-17	0.0160341	0.027487	1.56	0	0	69.3229	286.514	IL10
Positive Regulation of Interleukin-4 Production (GO:0032753)	2025-01-17	0.0160341	0.027487	1.56	0	0	69.3229	286.514	CD86
Negative Regulation of Vascular Associated Smooth Muscle Cell Proliferation (GO:1904706)	2025-01-17	0.0160341	0.027487	1.56	0	0	69.3229	286.514	IL10
Positive Regulation of Transcription Regulatory Region DNA Binding (GO:2000679)	2025-01-17	0.0160341	0.027487	1.56	0	0	69.3229	286.514	IFNG
Regulation of D-glucose Transmembrane Transport (GO:0010827)	2025-01-17	0.0160341	0.027487	1.56	0	0	69.3229	286.514	IL1B
Myeloid Cell Activation Involved in Immune Response (GO:0002275)	2025-01-17	0.0160341	0.027487	1.56	0	0	69.3229	286.514	IFNG
Negative Regulation of Chemokine Production (GO:0032682)	2025-01-17	0.0160341	0.027487	1.56	0	0	69.3229	286.514	IL10
Regulation of Angiogenesis (GO:0045765)	2/211	0.016834	0.0281849	1.55	0	0	11.1297	45.4579	IL1A;IL1B
Regulation of Exosomal Secretion (GO:1903541)	2025-01-18	0.0169696	0.0281849	1.55	0	0	65.2418	265.947	IFNG
Positive Regulation of Muscle Cell Differentiation (GO:0051149)	2025-01-18	0.0169696	0.0281849	1.55	0	0	65.2418	265.947	NOTCH2
Regulation of Integrin-Mediated Signaling Pathway (GO:2001044)	2025-01-18	0.0169696	0.0281849	1.55	0	0	65.2418	265.947	TIMP1
Negative Regulation of Nervous System Development (GO:0051961)	2025-01-18	0.0169696	0.0281849	1.55	0	0	65.2418	265.947	IL1B
Negative Regulation of Reproductive Process (GO:2000242)	2025-01-18	0.0169696	0.0281849	1.55	0	0	65.2418	265.947	TIMP1
Regulation of Oxidoreductase Activity (GO:0051341)	2025-01-18	0.0169696	0.0281849	1.55	0	0	65.2418	265.947	IL1B
Cardiac Atrium Morphogenesis (GO:0003209)	2025-01-18	0.0169696	0.0281849	1.55	0	0	65.2418	265.947	NOTCH2
Positive Regulation of Amyloid-Beta Formation (GO:1902004)	2025-01-18	0.0169696	0.0281849	1.55	0	0	65.2418	265.947	IFNG
Positive Regulation of Glycolytic Process (GO:0045821)	2025-01-19	0.0179043	0.0288392	1.54	0	0	61.6142	247.856	IFNG
Negative Regulation of Endopeptidase Activity (GO:0010951)	2025-01-19	0.0179043	0.0288392	1.54	0	0	61.6142	247.856	TIMP1
Positive Regulation of Macrophage Derived Foam Cell Differentiation (GO:0010744)	2025-01-19	0.0179043	0.0288392	1.54	0	0	61.6142	247.856	IL1B
Negative Regulation of Lipid Catabolic Process (GO:0050995)	2025-01-19	0.0179043	0.0288392	1.54	0	0	61.6142	247.856	IL1B
Positive Regulation of Purine Nucleotide Catabolic Process (GO:0033123)	2025-01-19	0.0179043	0.0288392	1.54	0	0	61.6142	247.856	IFNG
Regulation of Tissue Remodeling (GO:0034103)	2025-01-19	0.0179043	0.0288392	1.54	0	0	61.6142	247.856	IL2
Pulmonary Valve Morphogenesis (GO:0003184)	2025-01-19	0.0179043	0.0288392	1.54	0	0	61.6142	247.856	NOTCH2
Microglial Cell Activation (GO:0001774)	2025-01-19	0.0179043	0.0288392	1.54	0	0	61.6142	247.856	IFNG
Positive Regulation of Activated T Cell Proliferation (GO:0042104)	2025-01-19	0.0179043	0.0288392	1.54	0	0	61.6142	247.856	IL2
Regulation of Phosphatidylinositol 3-Kinase/Protein Kinase B Signal Transduction (GO:0051896)	2/219	0.0180564	0.0289868	1.54	0	0	10.7151	43.0132	IL1R1;IL1B
Regulation of Endopeptidase Activity (GO:0052548)	2025-01-20	0.0188382	0.029647	1.53	0	0	58.3684	231.832	TIMP1
Positive Regulation of Ion Transmembrane Transporter Activity (GO:0032414)	2025-01-20	0.0188382	0.029647	1.53	0	0	58.3684	231.832	IFNG
Positive Regulation of Osteoclast Differentiation (GO:0045672)	2025-01-20	0.0188382	0.029647	1.53	0	0	58.3684	231.832	IFNG
Positive Regulation of RNA Metabolic Process (GO:0051254)	2025-01-20	0.0188382	0.029647	1.53	0	0	58.3684	231.832	IL1B
Negative Regulation of B Cell Activation (GO:0050869)	2025-01-20	0.0188382	0.029647	1.53	0	0	58.3684	231.832	IL10
Regulation of Cellular Response to Transforming Growth Factor Beta Stimulus (GO:1903844)	2025-01-20	0.0188382	0.029647	1.53	0	0	58.3684	231.832	IL4
Regulation of Epithelial Cell Differentiation (GO:0030856)	2025-01-21	0.0197713	0.0305554	1.51	0	0	55.4472	217.549	IFNG
Positive Regulation of Lipid Catabolic Process (GO:0050996)	2025-01-21	0.0197713	0.0305554	1.51	0	0	55.4472	217.549	IL1B
Positive Regulation of Vascular Associated Smooth Muscle Cell Proliferation (GO:1904707)	2025-01-21	0.0197713	0.0305554	1.51	0	0	55.4472	217.549	IL10
Pulmonary Valve Development (GO:0003177)	2025-01-21	0.0197713	0.0305554	1.51	0	0	55.4472	217.549	NOTCH2
Response to Copper Ion (GO:0046688)	2025-01-21	0.0197713	0.0305554	1.51	0	0	55.4472	217.549	IL1A
Regulation of Autophagy (GO:0010506)	2/230	0.0197973	0.0305554	1.51	0	0	10.1925	39.977	IL10;IFNG
Fc-gamma Receptor Signaling Pathway Involved in Phagocytosis (GO:0038096)	2025-01-22	0.0207034	0.0313491	1.5	0	0	52.8042	204.746	IFNG
Regulation of Interleukin-4 Production (GO:0032673)	2025-01-22	0.0207034	0.0313491	1.5	0	0	52.8042	204.746	CD86
Positive Regulation of p38MAPK Cascade (GO:1900745)	2025-01-22	0.0207034	0.0313491	1.5	0	0	52.8042	204.746	IL1B
Negative Regulation of Cell Communication (GO:0010648)	2025-01-22	0.0207034	0.0313491	1.5	0	0	52.8042	204.746	IL1B
Negative Regulation of Cell Development (GO:0010721)	2025-01-22	0.0207034	0.0313491	1.5	0	0	52.8042	204.746	IL1B
Positive Regulation of Epithelial Cell Differentiation (GO:0030858)	2025-01-22	0.0207034	0.0313491	1.5	0	0	52.8042	204.746	IL13
Negative Regulation of Osteoclast Differentiation (GO:0045671)	2025-01-23	0.0216348	0.0320516	1.49	0	0	50.4015	193.212	IL4
Negative Regulation of Peptidase Activity (GO:0010466)	2025-01-23	0.0216348	0.0320516	1.49	0	0	50.4015	193.212	TIMP1
Positive Regulation of Phosphate Metabolic Process (GO:0045937)	2025-01-23	0.0216348	0.0320516	1.49	0	0	50.4015	193.212	IFNG
Positive Regulation of Amide Metabolic Process (GO:0034250)	2025-01-23	0.0216348	0.0320516	1.49	0	0	50.4015	193.212	IFNG
Positive Regulation of Amyloid Precursor Protein Catabolic Process (GO:1902993)	2025-01-23	0.0216348	0.0320516	1.49	0	0	50.4015	193.212	IFNG
Dendritic Cell Differentiation (GO:0097028)	2025-01-23	0.0216348	0.0320516	1.49	0	0	50.4015	193.212	IL4
Negative Regulation of Cell Junction Assembly (GO:1901889)	2025-01-23	0.0216348	0.0320516	1.49	0	0	50.4015	193.212	IL1B
Fc Receptor Mediated Stimulatory Signaling Pathway (GO:0002431)	2025-01-24	0.0225653	0.033225	1.48	0	0	48.2077	182.772	IFNG
Macrophage Differentiation (GO:0030225)	2025-01-24	0.0225653	0.033225	1.48	0	0	48.2077	182.772	IFNG
Positive Regulation of Cell Motility (GO:2000147)	2/249	0.0229645	0.0336645	1.47	0	0	9.39938	35.4715	IL4;IL1B
Positive Regulation of Interleukin-17 Production (GO:0032740)	2025-01-25	0.023495	0.0336645	1.47	0	0	46.1968	173.283	IL2
Glycosaminoglycan Biosynthetic Process (GO:0006024)	2025-01-25	0.023495	0.0336645	1.47	0	0	46.1968	173.283	IL1B
Regulation of Protein Export From Nucleus (GO:0046825)	2025-01-25	0.023495	0.0336645	1.47	0	0	46.1968	173.283	IL1B
Lymphocyte Proliferation (GO:0046651)	2025-01-25	0.023495	0.0336645	1.47	0	0	46.1968	173.283	IL10
Cardiac Conduction System Development (GO:0003161)	2025-01-25	0.023495	0.0336645	1.47	0	0	46.1968	173.283	NOTCH2
Response to Glucocorticoid (GO:0051384)	2025-01-25	0.023495	0.0336645	1.47	0	0	46.1968	173.283	IL10
Negative Regulation of Catalytic Activity (GO:0043086)	2025-01-25	0.023495	0.0336645	1.47	0	0	46.1968	173.283	TIMP1
Steroid Biosynthetic Process (GO:0006694)	2025-01-25	0.023495	0.0336645	1.47	0	0	46.1968	173.283	PRLR
Positive Regulation of Signal Transduction (GO:0009967)	2/256	0.0241812	0.0345445	1.46	0	0	9.1371	34.0099	IL1R1;IL1B
Regulation of Lipid Catabolic Process (GO:0050994)	2025-01-26	0.0244238	0.0345824	1.46	0	0	44.3467	164.624	IL1B
Regulation of Vascular Endothelial Growth Factor Receptor Signaling Pathway (GO:0030947)	2025-01-26	0.0244238	0.0345824	1.46	0	0	44.3467	164.624	IL1B
Cellular Response to Xenobiotic Stimulus (GO:0071466)	2025-01-26	0.0244238	0.0345824	1.46	0	0	44.3467	164.624	IL1B
Regulation of MAPK Cascade (GO:0043408)	2/260	0.0248883	0.0351364	1.45	0	0	8.99362	33.2167	IL1A;IL1B
Regulation of Cytokine Production Involved in Immune Response (GO:0002718)	2025-01-27	0.0253518	0.0352721	1.45	0	0	42.6389	156.694	IL10
Positive Regulation of Lipid Metabolic Process (GO:0045834)	2025-01-27	0.0253518	0.0352721	1.45	0	0	42.6389	156.694	IL1B
Regulation of Interferon-Alpha Production (GO:0032647)	2025-01-27	0.0253518	0.0352721	1.45	0	0	42.6389	156.694	IL10
Negative Regulation of Neurogenesis (GO:0050768)	2025-01-27	0.0253518	0.0352721	1.45	0	0	42.6389	156.694	IL1B
Regulation of Keratinocyte Proliferation (GO:0010837)	2025-01-27	0.0253518	0.0352721	1.45	0	0	42.6389	156.694	NOTCH2
Negative Regulation of Signaling (GO:0023057)	2025-01-28	0.026279	0.0364564	1.44	0	0	41.0576	149.408	IL1B
Fc-gamma Receptor Signaling Pathway (GO:0038094)	2025-01-29	0.0272053	0.0374171	1.43	0	0	39.5893	142.693	IFNG
Negative Regulation of Interleukin-1 Production (GO:0032692)	2025-01-29	0.0272053	0.0374171	1.43	0	0	39.5893	142.693	IL10
Positive Regulation of Protein Import Into Nucleus (GO:0042307)	2025-01-29	0.0272053	0.0374171	1.43	0	0	39.5893	142.693	IFNG
Negative Regulation of Signal Transduction (GO:0009968)	2/277	0.0279875	0.0382515	1.42	0	0	8.43037	30.147	IL10;IL1B
Negative Regulation of Mitotic Cell Cycle (GO:0045930)	2025-01-30	0.0281308	0.0382515	1.42	0	0	38.2222	136.487	IL10
Positive Regulation of Peptidyl-Serine Phosphorylation (GO:0033138)	2025-01-30	0.0281308	0.0382515	1.42	0	0	38.2222	136.487	IFNG
Positive Regulation of Response to Wounding (GO:1903036)	2025-01-30	0.0281308	0.0382515	1.42	0	0	38.2222	136.487	CNTF
Negative Regulation of Insulin Receptor Signaling Pathway (GO:0046627)	2025-01-31	0.0290555	0.0392863	1.41	0	0	36.9463	130.736	IL1B
Negative Regulation of MAP Kinase Activity (GO:0043407)	2025-01-31	0.0290555	0.0392863	1.41	0	0	36.9463	130.736	IL1B
Negative Regulation of Interleukin-6 Production (GO:0032715)	1932-01-01	0.0299793	0.0401957	1.4	0	0	35.7527	125.394	IL10
Regulation of Macrophage Derived Foam Cell Differentiation (GO:0010743)	1932-01-01	0.0299793	0.0401957	1.4	0	0	35.7527	125.394	IL1B
Negative Regulation of Cellular Response to Insulin Stimulus (GO:1900077)	1932-01-01	0.0299793	0.0401957	1.4	0	0	35.7527	125.394	IL1B
Positive Regulation of Interleukin-12 Production (GO:0032735)	1933-01-01	0.0309023	0.0408625	1.39	0	0	34.6337	120.419	IFNG
Negative Regulation of Lipid Metabolic Process (GO:0045833)	1933-01-01	0.0309023	0.0408625	1.39	0	0	34.6337	120.419	IL1B
Regulation of Activated T Cell Proliferation (GO:0046006)	1933-01-01	0.0309023	0.0408625	1.39	0	0	34.6337	120.419	IL2
Regulation of Amyloid-Beta Formation (GO:1902003)	1933-01-01	0.0309023	0.0408625	1.39	0	0	34.6337	120.419	IFNG
Positive Regulation of Cell Development (GO:0010720)	1933-01-01	0.0309023	0.0408625	1.39	0	0	34.6337	120.419	IFNG
Regulation of Ras Protein Signal Transduction (GO:0046578)	1934-01-01	0.0318245	0.0418513	1.38	0	0	33.5825	115.776	NOTCH2
Positive Regulation of Carbohydrate Metabolic Process (GO:0045913)	1934-01-01	0.0318245	0.0418513	1.38	0	0	33.5825	115.776	IFNG
Negative Regulation of Myeloid Leukocyte Differentiation (GO:0002762)	1935-01-01	0.0327458	0.0428283	1.37	0	0	32.5931	111.435	IL4
Regulation of p38MAPK Cascade (GO:1900744)	1935-01-01	0.0327458	0.0428283	1.37	0	0	32.5931	111.435	IL1B
Cellular Response to Heat (GO:0034605)	1936-01-01	0.0336663	0.0437935	1.36	0	0	31.6603	107.368	IL1A
Positive Regulation of Epithelial Cell Migration (GO:0010634)	1936-01-01	0.0336663	0.0437935	1.36	0	0	31.6603	107.368	IFNG
Regulation of Vascular Associated Smooth Muscle Cell Proliferation (GO:1904705)	1938-01-01	0.0355048	0.0459361	1.34	0	0	29.9459	99.9622	IL10
Positive Regulation of Exocytosis (GO:0045921)	1938-01-01	0.0355048	0.0459361	1.34	0	0	29.9459	99.9622	IFNG
Positive Regulation of Lymphocyte Differentiation (GO:0045621)	1939-01-01	0.0364228	0.0469972	1.33	0	0	29.1564	96.5824	IL4
Negative Regulation of Protein Secretion (GO:0050709)	1940-01-01	0.03734	0.047923	1.32	0	0	28.4074	93.3948	IL1B
Negative Regulation of Cell-Cell Adhesion (GO:0022408)	1940-01-01	0.03734	0.047923	1.32	0	0	28.4074	93.3948	IL10
Negative Regulation of Type I Interferon Production (GO:0032480)	1941-01-01	0.0382563	0.0488379	1.31	0	0	27.6958	90.3839	IL10
Regulation of Protein Import Into Nucleus (GO:0042306)	1941-01-01	0.0382563	0.0488379	1.31	0	0	27.6958	90.3839	IFNG
Regulation of Glycolytic Process (GO:0006110)	1942-01-01	0.0391719	0.0494803	1.31	0	0	27.019	87.536	IFNG
Notch Signaling Pathway (GO:0007219)	1942-01-01	0.0391719	0.0494803	1.31	0	0	27.019	87.536	NOTCH2
Positive Regulation of Receptor Signaling Pathway via STAT (GO:1904894)	1942-01-01	0.0391719	0.0494803	1.31	0	0	27.019	87.536	IL10
Regulation of Receptor-Mediated Endocytosis (GO:0048259)	1942-01-01	0.0391719	0.0494803	1.31	0	0	27.019	87.536	IL4
Positive Regulation of Myeloid Leukocyte Differentiation (GO:0002763)	1943-01-01	0.0400866	0.0502391	1.3	0	0	26.3743	84.8387	IFNG
Positive Regulation of Receptor-Mediated Endocytosis (GO:0048260)	1943-01-01	0.0400866	0.0502391	1.3	0	0	26.3743	84.8387	IL4
Regulation of Chemokine Production (GO:0032642)	1943-01-01	0.0400866	0.0502391	1.3	0	0	26.3743	84.8387	IFNG
Regulation of Nervous System Development (GO:0051960)	1945-01-01	0.0419135	0.0523919	1.28	0	0	25.173	79.8524	IL1B
T Cell Differentiation (GO:0030217)	1946-01-01	0.0428257	0.0532548	1.27	0	0	24.6123	77.544	IL2
Negative Regulation of Protein Serine/Threonine Kinase Activity (GO:0071901)	1946-01-01	0.0428257	0.0532548	1.27	0	0	24.6123	77.544	IL1B
Cellular Response to Type II Interferon (GO:0071346)	1947-01-01	0.0437372	0.0539687	1.27	0	0	24.0761	75.3475	IFNG
Positive Regulation of T Cell Mediated Immunity (GO:0002711)	1947-01-01	0.0437372	0.0539687	1.27	0	0	24.0761	75.3475	IL1B
Regulation of T Cell Differentiation (GO:0045580)	1947-01-01	0.0437372	0.0539687	1.27	0	0	24.0761	75.3475	IL4
Natural Killer Cell Activation (GO:0030101)	1948-01-01	0.0446477	0.0548105	1.26	0	0	23.5626	73.2551	IL2
Secondary Alcohol Metabolic Process (GO:1902652)	1948-01-01	0.0446477	0.0548105	1.26	0	0	23.5626	73.2551	IL4
Regulation of DNA-templated Transcription (GO:0006355)	1939-05-01	0.0451543	0.0551515	1.26	0	0	2.98685	9.25226	CD86;IL10;IL4;IFNG;IL1B
Regulation of Insulin Receptor Signaling Pathway (GO:0046626)	1949-01-01	0.0455575	0.0551515	1.26	0	0	23.0706	71.26	IL1B
Activation of Protein Kinase Activity (GO:0032147)	1949-01-01	0.0455575	0.0551515	1.26	0	0	23.0706	71.26	PRLR
Positive Regulation of Smooth Muscle Cell Proliferation (GO:0048661)	1949-01-01	0.0455575	0.0551515	1.26	0	0	23.0706	71.26	IL10
Positive Regulation of Epithelial to Mesenchymal Transition (GO:0010718)	1949-01-01	0.0455575	0.0551515	1.26	0	0	23.0706	71.26	IL1B
Positive Regulation of MAPK Cascade (GO:0043410)	2/362	0.0456149	0.0551515	1.26	0	0	6.41209	19.7975	NOTCH2;IL1B
Positive Regulation of Nervous System Development (GO:0051962)	1951-01-01	0.0473746	0.0568495	1.25	0	0	22.1456	67.5366	IFNG
Regulation of Lipid Metabolic Process (GO:0019216)	1951-01-01	0.0473746	0.0568495	1.25	0	0	22.1456	67.5366	IL1B
Cardiac Muscle Tissue Development (GO:0048738)	1951-01-01	0.0473746	0.0568495	1.25	0	0	22.1456	67.5366	NOTCH2
Regulation of Cell Development (GO:0060284)	1952-01-01	0.0482819	0.0577938	1.24	0	0	21.7102	65.7972	IL1B
Positive Regulation of Small GTPase Mediated Signal Transduction (GO:0051057)	1953-01-01	0.0491884	0.0585866	1.23	0	0	21.2917	64.1326	NOTCH2
Cellular Response to Mechanical Stimulus (GO:0071260)	1953-01-01	0.0491884	0.0585866	1.23	0	0	21.2917	64.1326	IL1B
Regulation of Smooth Muscle Cell Proliferation (GO:0048660)	1954-01-01	0.050094	0.0595177	1.23	0	0	20.8889	62.5383	IFNG
Regulation of Metabolic Process (GO:0019222)	1955-01-01	0.0509989	0.0599987	1.22	0	0	20.501	61.0101	IFNG
Positive Regulation of Protein Localization to Plasma Membrane (GO:1903078)	1955-01-01	0.0509989	0.0599987	1.22	0	0	20.501	61.0101	IFNG
Interferon-Mediated Signaling Pathway (GO:0140888)	1955-01-01	0.0509989	0.0599987	1.22	0	0	20.501	61.0101	IFNG
Regulation of Receptor Signaling Pathway via JAK-STAT (GO:0046425)	1955-01-01	0.0509989	0.0599987	1.22	0	0	20.501	61.0101	IL10
Positive Regulation of Interleukin-1 Beta Production (GO:0032731)	1956-01-01	0.0519029	0.060913	1.22	0	0	20.1273	59.5441	IFNG
Positive Regulation of Protein Localization to Cell Periphery (GO:1904377)	1957-01-01	0.0528061	0.0618218	1.21	0	0	19.7669	58.1369	IFNG
Peptidyl-Tyrosine Phosphorylation (GO:0018108)	1958-01-01	0.0537086	0.0625731	1.2	0	0	19.4191	56.785	PRLR
Sterol Metabolic Process (GO:0016125)	1958-01-01	0.0537086	0.0625731	1.2	0	0	19.4191	56.785	IL4
Regulation of Phagocytosis (GO:0050764)	1962-01-01	0.05731	0.0666073	1.18	0	0	18.1421	51.8733	IFNG
Positive Regulation of Interleukin-1 Production (GO:0032732)	1963-01-01	0.0582084	0.0671635	1.17	0	0	17.8486	50.7564	IFNG
Positive Regulation of Interleukin-8 Production (GO:0032757)	1963-01-01	0.0582084	0.0671635	1.17	0	0	17.8486	50.7564	IL1B
Negative Regulation of Metabolic Process (GO:0009892)	1963-01-01	0.0582084	0.0671635	1.17	0	0	17.8486	50.7564	IL1B
Positive Regulation of Neurogenesis (GO:0050769)	1964-01-01	0.0591059	0.0677108	1.17	0	0	17.5644	49.6795	IFNG
Positive Regulation of Phagocytosis (GO:0050766)	1964-01-01	0.0591059	0.0677108	1.17	0	0	17.5644	49.6795	IFNG
Positive Regulation of T Cell Differentiation (GO:0045582)	1964-01-01	0.0591059	0.0677108	1.17	0	0	17.5644	49.6795	IL4
Regulation of Phosphorylation (GO:0042325)	1965-01-01	0.0600026	0.0682494	1.17	0	0	17.2891	48.6405	IL4
Cellular Response to Virus (GO:0098586)	1965-01-01	0.0600026	0.0682494	1.17	0	0	17.2891	48.6405	IFNG
Negative Regulation of Autophagy (GO:0010507)	1965-01-01	0.0600026	0.0682494	1.17	0	0	17.2891	48.6405	IL10
Regulation of Protein Serine/Threonine Kinase Activity (GO:0071900)	1967-01-01	0.0617936	0.0701204	1.15	0	0	16.7635	46.6687	IFNG
Extrinsic Apoptotic Signaling Pathway (GO:0097191)	1968-01-01	0.0626879	0.0708005	1.15	0	0	16.5124	45.7326	IFNG
Cholesterol Metabolic Process (GO:0008203)	1968-01-01	0.0626879	0.0708005	1.15	0	0	16.5124	45.7326	IL4
Positive Regulation of Protein Transport (GO:0051222)	1973-01-01	0.0671473	0.0753053	1.12	0	0	15.3619	41.4904	IL1A
Regulation of MAP Kinase Activity (GO:0043405)	1973-01-01	0.0671473	0.0753053	1.12	0	0	15.3619	41.4904	IL1B
Negative Regulation of Cellular Response to Growth Factor Stimulus (GO:0090288)	1973-01-01	0.0671473	0.0753053	1.12	0	0	15.3619	41.4904	IL4
Positive Regulation of Protein Localization to Nucleus (GO:1900182)	1975-01-01	0.0689254	0.0769399	1.11	0	0	14.9452	39.9744	IFNG
Positive Regulation of Protein Serine/Threonine Kinase Activity (GO:0071902)	1975-01-01	0.0689254	0.0769399	1.11	0	0	14.9452	39.9744	IFNG
Positive Regulation of Protein Localization to Membrane (GO:1905477)	1976-01-01	0.0698132	0.0775702	1.11	0	0	14.7452	39.2507	IFNG
Positive Regulation of Protein Secretion (GO:0050714)	1976-01-01	0.0698132	0.0775702	1.11	0	0	14.7452	39.2507	IL1A
Cellular Response to UV (GO:0034644)	1977-01-01	0.0707003	0.0783744	1.11	0	0	14.5504	38.5486	TIMP1
Positive Regulation of Macroautophagy (GO:0016239)	1978-01-01	0.0715865	0.079174	1.1	0	0	14.3608	37.8671	IL4
Negative Regulation of RNA Biosynthetic Process (GO:1902679)	2/470	0.0724405	0.0797856	1.1	0	0	4.90523	12.8762	IL4;IFNG
Positive Regulation of Growth (GO:0045927)	1979-01-01	0.0724719	0.0797856	1.1	0	0	14.1759	37.2055	IL2
Negative Regulation of Neuron Apoptotic Process (GO:0043524)	1981-01-01	0.0742404	0.0811741	1.09	0	0	13.8201	35.9385	CNTF
Positive Regulation of JNK Cascade (GO:0046330)	1981-01-01	0.0742404	0.0811741	1.09	0	0	13.8201	35.9385	IL1B
Negative Regulation of Cell Cycle (GO:0045786)	1981-01-01	0.0742404	0.0811741	1.09	0	0	13.8201	35.9385	IL10
Regulation of Cell Migration (GO:0030334)	2/479	0.0748682	0.0816744	1.09	0	0	4.81046	12.4688	IL4;IL1B
Regulation of Interleukin-1 Beta Production (GO:0032651)	1982-01-01	0.0751235	0.0817671	1.09	0	0	13.6488	35.3317	IFNG
Positive Regulation of Protein Kinase Activity (GO:0045860)	1988-01-01	0.080405	0.0873177	1.06	0	0	12.7037	32.022	IFNG
Regulation of Protein Localization to Plasma Membrane (GO:1903076)	1990-01-01	0.0821592	0.0890212	1.05	0	0	12.417	31.0312	IFNG
Regulation of Epithelial to Mesenchymal Transition (GO:0010717)	1991-01-01	0.0830351	0.0897676	1.05	0	0	12.2784	30.5547	IL1B
Positive Regulation of Cellular Component Biogenesis (GO:0044089)	1993-01-01	0.0847845	0.0914529	1.04	0	0	12.0103	29.637	IFNG
Regulation of Immune Response (GO:0050776)	1994-01-01	0.085658	0.0919817	1.04	0	0	11.8805	29.1951	IL4
Lipid Biosynthetic Process (GO:0008610)	1994-01-01	0.085658	0.0919817	1.04	0	0	11.8805	29.1951	PRLR
Positive Regulation of Protein Modification Process (GO:0031401)	1998-01-01	0.0891442	0.0952989	1.02	0	0	11.3883	27.5313	IFNG
Defense Response to Gram-positive Bacterium (GO:0050830)	1998-01-01	0.0891442	0.0952989	1.02	0	0	11.3883	27.5313	IL1B
Regulation of Defense Response (GO:0031347)	1/103	0.0934842	0.0997164	1	0	0	10.8273	25.6604	IL1R1
Positive Regulation of Protein-Containing Complex Assembly (GO:0031334)	1/105	0.0952147	0.101113	0.995	0	0	10.6181	24.9696	IFNG
Positive Regulation of NF-kappaB Transcription Factor Activity (GO:0051092)	1/105	0.0952147	0.101113	0.995	0	0	10.6181	24.9696	IL1B
Regulation of Macroautophagy (GO:0016241)	1/106	0.0960788	0.101581	0.993	0	0	10.5164	24.6356	IL4
Steroid Metabolic Process (GO:0008202)	1/106	0.0960788	0.101581	0.993	0	0	10.5164	24.6356	PRLR
Positive Regulation of Cell Growth (GO:0030307)	1/107	0.0969421	0.102269	0.99	0	0	10.4167	24.3088	IL2
Regulation of JNK Cascade (GO:0046328)	1/115	0.10382	0.109285	0.961	0	0	9.68177	21.9301	IL1B
Modulation of Chemical Synaptic Transmission (GO:0050804)	1/117	0.105532	0.110843	0.955	0	0	9.51389	21.3943	IL1B
Positive Regulation of Epithelial Cell Proliferation (GO:0050679)	1/118	0.106387	0.111497	0.953	0	0	9.4321	21.1342	NOTCH2
Regulation of Mitotic Cell Cycle (GO:0007346)	1/124	0.111499	0.1166	0.933	0	0	8.96929	19.6763	IL10
Regulation of Protein-Containing Complex Assembly (GO:0043254)	1/126	0.113197	0.118119	0.928	0	0	8.82489	19.2261	IFNG
Negative Regulation of MAPK Cascade (GO:0043409)	1/127	0.114045	0.118745	0.925	0	0	8.75441	19.0073	IL1B
Regulation of Neuron Apoptotic Process (GO:0043523)	1/129	0.115738	0.120247	0.92	0	0	8.61675	18.5814	CNTF
Neuron Projection Guidance (GO:0097485)	1/132	0.118272	0.122351	0.912	0	0	8.41815	17.9708	NOTCH2
Regulation of Response to External Stimulus (GO:0032101)	1/132	0.118272	0.122351	0.912	0	0	8.41815	17.9708	IL1R1
Axon Guidance (GO:0007411)	1/152	0.134992	0.139347	0.856	0	0	7.29581	14.6101	NOTCH2
Regulation of Macromolecule Biosynthetic Process (GO:0010556)	1/170	0.149783	0.154282	0.812	0	0	6.51282	12.365	IL10
Negative Regulation of Transcription by RNA Polymerase II (GO:0000122)	2/732	0.152103	0.156338	0.806	0	0	3.1025	5.84261	IL4;IFNG
Regulation of Transcription by RNA Polymerase II (GO:0006357)	1950-04-01	0.157974	0.162025	0.79	0	0	2.10567	3.88564	NOTCH2;IL4;IFNG;IL13
Axonogenesis (GO:0007409)	1/200	0.173902	0.177981	0.75	0	0	5.52261	9.66049	NOTCH2
Regulation of Signal Transduction (GO:0009966)	1/211	0.182583	0.186467	0.729	0	0	5.23042	8.89461	TIMP1
Negative Regulation of Cell Differentiation (GO:0045596)	1/220	0.189621	0.193244	0.714	0	0	5.01319	8.33559	IFNG
Defense Response to Bacterium (GO:0042742)	1/221	0.190399	0.193626	0.713	0	0	4.99015	8.27683	IL1B
Regulation of Cell Growth (GO:0001558)	1/222	0.191177	0.194006	0.712	0	0	4.96732	8.21872	IL2
Cell Surface Receptor Protein Tyrosine Kinase Signaling Pathway (GO:0007169)	1/296	0.246804	0.24961	0.603	0	0	3.70734	5.18717	PRLR
Negative Regulation of DNA-templated Transcription (GO:0045892)	2/1006	0.247421	0.24961	0.603	0	0	2.22369	3.10575	IL4;IFNG
Positive Regulation of Cell Differentiation (GO:0045597)	1/297	0.24753	0.24961	0.603	0	0	3.69463	5.15853	IL1B
Regulation of Intracellular Signal Transduction (GO:1902531)	1/302	0.251152	0.252731	0.597	0	0	3.63234	5.01879	IL1B
Protein-Containing Complex Assembly (GO:0065003)	1/323	0.266182	0.267296	0.573	0	0	3.39182	4.48933	PRLR
Regulation of RNA Biosynthetic Process (GO:2001141)	1/465	0.360564	0.361317	0.442	0	0	2.33681	2.38374	IL1B
Nervous System Development (GO:0007399)	1/480	0.369833	0.369833	0.432	0	0	2.26189	2.24991	NOTCH2

## Sheet: GO_MF
Term	Overlap	P-value	Adjusted P-value	#NAME?	Old P-value	Old Adjusted P-value	Odds Ratio	Combined Score	Genes
Cytokine Activity (GO:0005125)	9/186	3.65e-14	7.3e-13	12.1	0	0	100.698	3115.73	IL10;IL4;IL1A;CNTF;IFNG;IL1B;IL13;TIMP1;IL2
Receptor Ligand Activity (GO:0048018)	10/380	4.32e-13	4.32e-12	11.4	0	0	58.8919	1676.64	CD86;IL10;IL4;IL1A;CNTF;IFNG;IL1B;IL13;TIMP1;IL2
Growth Factor Receptor Binding (GO:0070851)	6/100	3.45e-10	2.3e-09	8.64	0	0	97.6448	2127.31	IL10;IL4;CNTF;IL1R1;IL1B;IL2
Cytokine Receptor Binding (GO:0005126)	6/109	5.84e-10	2.92e-09	8.53	0	0	89.0724	1893.8	IL10;IL4;CNTF;IL1B;IL13;IL2
Growth Factor Activity (GO:0008083)	1992-04-01	1.54e-06	6.16e-06	5.21	0	0	60.2818	806.748	IL10;IL4;CNTF;IL2
Cytokine Receptor Activity (GO:0004896)	1983-02-01	0.00277925	0.00926416	2.03	0	0	28.9034	170.113	IL1R1;PRLR
Ciliary Neurotrophic Factor Receptor Binding (GO:0005127)	2025-01-05	0.00474139	0.0135468	1.87	0	0	277.458	1484.8	CNTF
Interleukin-6 Receptor Binding (GO:0005138)	2025-01-06	0.00568712	0.0142178	1.85	0	0	221.956	1147.41	CNTF
Interleukin-1 Receptor Binding (GO:0005149)	2025-01-08	0.00757601	0.0168356	1.77	0	0	158.524	774.035	IL1B
Platelet-Derived Growth Factor Receptor Binding (GO:0005161)	2025-01-12	0.0113436	0.0223335	1.65	0	0	100.859	451.756	IL1R1
Metalloendopeptidase Inhibitor Activity (GO:0008191)	2025-01-13	0.0122834	0.0223335	1.65	0	0	92.4491	406.73	TIMP1
Peptidase Inhibitor Activity (GO:0030414)	1940-01-01	0.03734	0.0598765	1.22	0	0	28.4074	93.3948	TIMP1
Kinase Activator Activity (GO:0019209)	1942-01-01	0.0391719	0.0598765	1.22	0	0	27.019	87.536	IL2
Copper Ion Binding (GO:0005507)	1945-01-01	0.0419135	0.0598765	1.22	0	0	25.173	79.8524	IL1A
Transition Metal Ion Binding (GO:0046914)	2/458	0.0692461	0.0923281	1.03	0	0	5.03741	13.4503	IL1A;TIMP1
Endopeptidase Inhibitor Activity (GO:0004866)	1/119	0.107241	0.134051	0.873	0	0	9.35169	20.8793	TIMP1
DNA-binding Transcription Activator Activity, RNA Polymerase II-specific (GO:0001228)	1/318	0.26263	0.307492	0.512	0	0	3.4462	4.6076	NOTCH2
Zinc Ion Binding (GO:0008270)	1/338	0.276743	0.307492	0.512	0	0	3.23838	4.16023	TIMP1
Transcription Cis-Regulatory Region Binding (GO:0000976)	1/548	0.410279	0.431872	0.365	0	0	1.9738	1.75849	NOTCH2
Cis-Regulatory Region Sequence-Specific DNA Binding (GO:0000987)	1/1035	0.635806	0.635806	0.197	0	0	1.018	0.461012	NOTCH2

## Sheet: GO_CC
Term	Overlap	P-value	Adjusted P-value	#NAME?	Old P-value	Old Adjusted P-value	Odds Ratio	Combined Score	Genes
Glial Cell Projection (GO:0097386)	2025-01-15	0.0141604	0.164465	0.784	0	0	79.2341	337.324	CNTF
Endosome Lumen (GO:0031904)	2025-01-25	0.023495	0.164465	0.784	0	0	46.1968	173.283	PRLR
Platelet Alpha Granule Lumen (GO:0031093)	1966-01-01	0.0608985	0.284193	0.546	0	0	17.0222	47.6375	TIMP1
Platelet Alpha Granule (GO:0031091)	1990-01-01	0.0821592	0.287557	0.541	0	0	12.417	31.0312	TIMP1
Axon (GO:0030424)	1/217	0.187281	0.457107	0.34	0	0	5.08359	8.51575	CNTF
Intracellular Organelle Lumen (GO:0070013)	2/912	0.21399	0.457107	0.34	0	0	2.46555	3.80144	TIMP1;PRLR
Endoplasmic Reticulum Lumen (GO:0005788)	1/289	0.241701	0.457107	0.34	0	0	3.7988	5.3945	TIMP1
Secretory Granule Lumen (GO:0034774)	1/316	0.261204	0.457107	0.34	0	0	3.46843	4.65621	TIMP1
Golgi Membrane (GO:0000139)	1/476	0.367374	0.571471	0.243	0	0	2.2814	2.28454	NOTCH2
Neuron Projection (GO:0043005)	1/560	0.417156	0.584018	0.234	0	0	1.93023	1.68759	CNTF
Endoplasmic Reticulum Membrane (GO:0005789)	1/872	0.571468	0.671165	0.173	0	0	1.21891	0.682034	NOTCH2
Bounding Membrane of Organelle (GO:0098588)	1/881	0.575285	0.671165	0.173	0	0	1.20587	0.666714	NOTCH2
Nucleus (GO:0005634)	1979-01-01	0.995086	0.99805	0.000848	0	0	0.172008	0.000847	NOTCH2
Intracellular Membrane-Bounded Organelle (GO:0043231)	1997-01-01	0.99805	0.99805	0.000848	0	0	0.14281	0.000279	NOTCH2
