# Supplementary material for: Network-Level Organization of Systemic Inflammation Reflects Early Alzheimer’s-Like Behavioral Changes
Source: Research Square preprint supplement (doi:10.21203/rs.3.rs-7482654/v1), 2025-10-14
Supplement: Supplementary file 6 [file a7b827a81ae6fa36063e35c1.xlsx]

## Sheet: All nodes
Inflammation Profile Network	@id	Display name	Query term	Fold Change	PCA Loading	Average Shortest Path Length	Betweenness Centrality	Closeness Centrality	Clustering Coefficient	Degree	Eccentricity	Neighborhood Connectivity	Number Of Directed Edges	Number Of Undirected Edges	Partner Of Multi Edged Node Pairs	Radiality	Stress	Topological Coefficient
1	stringdb:10116.ENSRNOP00000072445	Ngf	bNGF	0.240247	0.57716	1.22222	0.0043606	0.818182	0.923077	14	2	14.8571	0	14	0	0.986928	14	0.825397
1	stringdb:10116.ENSRNOP00000003129	Cd86	CD86	-0.32398	0.775119	1.33333	0.000594	0.75	0.984848	12	2	15.4167	0	12	0	0.980392	2
1	stringdb:10116.ENSRNOP00000070985	Cxcl3	CINC2	-0.498605	0.658708	1.55556	0	0.642857	1	8	2	15.875	0	8	0	0.96732	0
1	stringdb:10116.ENSRNOP00000016690	Cntf	CNTF	-0.268352	0.785441	1.38889	0.00925926	0.72	0.854545	11	2	14.7273	0	11	0	0.977124	18
1	stringdb:10116.ENSRNOP00000022128	Cx3cl1	Fractalkine	-0.404589	0.434043	1.16667	0.0112962	0.857143	0.857143	15	2	14.2667	0	15	0	0.990196	30	0.792593
1	stringdb:10116.ENSRNOP00000009917	Ifng	IFNg	-0.346759	0.925007	1.05556	0.0300585	0.947368	0.779412	17	2	13.5294	0	17	0	0.996732	62
1	stringdb:10116.ENSRNOP00000006246	Il10	IL10	-0.323314	0.969681	1.05556	0.0300585	0.947368	0.779412	17	2	13.5294	0	17	0	0.996732	62	0.751634
1	stringdb:10116.ENSRNOP00000010121	Il13	IL13	-0.236399	0.740845	1.16667	0.0164026	0.857143	0.847619	15	2	14.2	0	15	0	0.990196	34	0.788889
1	stringdb:10116.ENSRNOP00000071252	Il1a	IL1a	-0.41587	0.670152	1.11111	0.0141544	0.9	0.841667	16	2	14.0625	0	16	0	0.993464	38	0.78125
1	stringdb:10116.ENSRNOP00000006308	Il1b	IL1b	-0.149205	0.93075	1.11111	0.0141544	0.9	0.841667	16	2	14.0625	0	16	0	0.993464	38
1	stringdb:10116.ENSRNOP00000019673	Il1r1	IL1r1	-0.669828	0.44808	1.38889	0	0.72	1	11	2	15.6364	0	11	0	0.977124	0	0.868687
1	stringdb:10116.ENSRNOP00000023327	Il2	IL2	-0.222204	0.939036	1.16667	0.0164026	0.857143	0.847619	15	2	14.2	0	15	0	0.990196	34
1	stringdb:10116.ENSRNOP00000010029	Il4	IL4	-0.315796	0.899216	1.11111	0.0197877	0.9	0.825	16	2	13.9375	0	16	0	0.993464	44	0.774306
1	stringdb:10116.ENSRNOP00000009448	Ccl2	MCP1	-0.200288	0.742216	1.11111	0.0141544	0.9	0.841667	16	2	14.0625	0	16	0	0.993464	38	0.78125
1	stringdb:10116.ENSRNOP00000025718	Notch2	Notch2	-0.0455138	0.598732	2	0	0.5	0	1	3	17	0	1	0	0.941176	0
1	stringdb:10116.ENSRNOP00000072948	Prlr	PRLR	-0.477253	0.851425	1.72222	0.00118835	0.580645	0.866667	6	3	15.1667	0	6	0	0.957516	4	0.892157
1	stringdb:10116.ENSRNOP00000013745	Timp1	TIMP1	-0.0826205	0.67887	1.27778	0.00474634	0.782609	0.923077	13	2	14.9231	0	13	0	0.98366	12	0.82906
1	stringdb:10116.ENSRNOP00000001110	LOC103694380	TNFa	-0.164696	0.912288	1.05556	0.125265	0.947368	0.742647	17	2	13.2353	0	17	0	0.996732	82	0.775087
1	stringdb:10116.ENSRNOP00000026637	Vegfa	VEGF	-0.537404	0.575427	1.33333	0.00184195	0.75	0.954545	12	2	15.25	0	12	0	0.980392	6	0.847222
2	stringdb:10116.ENSRNOP00000006070	Dcn	Decorin	-0.215269	0.849873	2.125	0	0.470588	1	2	3	3.5	0	2	0	0.775	0
2	stringdb:10116.ENSRNOP00000009756	Ccl11	Eotaxin	-0.0241175	0.819993	1.875	0	0.533333	1	3	3	4.66667	0	3	0	0.825	0
2	stringdb:10116.ENSRNOP00000076296	Flt3lg	FLT3LG	-0.222509	0.758528	2.25	0	0.444444	0	1	3	5	0	1	0	0.75	0	0
2	stringdb:10116.ENSRNOP00000013538	Lgals1	Galectin-1	-0.279666	0.687435	0	0	0	0	0	0	0	0	0	0	Infinity	0
2	stringdb:10116.ENSRNOP00000066915	Gas1	Gas1	-0.0379287	0.569334	0	0	0	0	0	0	0	0	0	0	Infinity	0	0
2	stringdb:10116.ENSRNOP00000009764	Hgf	HGF	0.0139995	0.580922	1.375	0.428571	0.727273	0.4	5	2	3.6	0	5	0	0.925	32	0.45
2	stringdb:10116.ENSRNOP00000019880	Il1rl2	IL1rL2	3.20338	-0.578657	0	0	0	0	0	0	0	0	0	0	Infinity	0	0
2	stringdb:10116.ENSRNOP00000030704	Il3	IL3	-0.172249	-0.571751	1.375	0.285714	0.727273	0.5	5	2	3.6	0	5	0	0.925	20	0.485714
2	stringdb:10116.ENSRNOP00000006141	F11r	JAM-A	-0.162178	0.548529	0	0	0	0	0	0	0	0	0	0	Infinity	0	0
2	stringdb:10116.ENSRNOP00000015139	Ccl3	MIP1a	-0.200288	-0.564083	1.5	0.0357143	0.666667	0.833333	4	2	4.5	0	4	0	0.9	6
2	stringdb:10116.ENSRNOP00000063585	Igdcc4	Nope	-0.360976	0.752645	0	0	0	0	0	0	0	0	0	0	Infinity	0	0
2	stringdb:10116.ENSRNOP00000026212	Notch1	Notch1	-0.150182	0.710547	2.125	0	0.470588	1	2	3	3.5	0	2	0	0.775	0	0.7
2	stringdb:10116.ENSRNOP00000014865	Ccl5	RANTES	-0.0312187	0.689519	1.375	0.285714	0.727273	0.5	5	2	3.6	0	5	0	0.925	20	0.485714
2	stringdb:10116.ENSRNOP00000004843	Tnfrsf12a	Tnfrsf12a	-0.0569345	0.724406	2.25	0	0.444444	0	1	3	5	0	1	0	0.75	0	0
3	stringdb:10116.ENSRNOP00000057330	Ccl27	CCL27	3.9743	0.528298	1.625	0	0.615385	1	3	2	6	0	3	0	0.921875	0	0.75
3	stringdb:10116.ENSRNOP00000003823	Cxcl6	CXCL5	0.0227733	-0.544903	1.375	0.0386905	0.727273	0.7	5	2	5.4	0	5	0	0.953125	6
3	stringdb:10116.ENSRNOP00000003794	Ppbp	CXCL7	0.0242112	-0.478641	1.375	0.0386905	0.727273	0.7	5	2	5.4	0	5	0	0.953125	6
3	stringdb:10116.ENSRNOP00000070344	Lgals3	Galectin-3	-0.242692	-0.526742	1.625	0	0.615385	1	3	2	6.33333	0	3	0	0.921875	0
3	stringdb:10116.ENSRNOP00000034235	Csf2	GMCSF	-0.067253	0.610859	1.25	0.0595238	0.8	0.666667	6	2	5.16667	0	6	0	0.96875	10
3	stringdb:10116.ENSRNOP00000028066	Icam1	ICAM1	-0.0880149	-0.5683	1.375	0.0327381	0.727273	0.7	5	2	5.4	0	5	0	0.953125	6
3	stringdb:10116.ENSRNOP00000013732	Il6	IL6	2.0561	0.73072	1	0.303571	1	0.464286	8	1	4.25	0	8	0	1	30
3	stringdb:10116.ENSRNOP00000003733	Sell	L-Selectin	-0.115135	-0.432068	1.375	0.0625	0.727273	0.6	5	2	5.2	0	5	0	0.953125	8	0.65
3	stringdb:10116.ENSRNOP00000074787	Pdgfa	PDGFA	1.8563	0.677316	1.75	0	0.571429	1	2	2	6.5	0	2	0	0.90625	0	0.8125
3	stringdb:10116.ENSRNOP00000000508	Ager	RAGE	1.17315	0.770649	0	0	0	0	0	0	0	0	0	0	Infinity	0
4	stringdb:10116.ENSRNOP00000016717	Il17f	IL17F	-0.255876	0.660173	1.4	0	0.714286	1	3	2	3.66667	0	3	0	0.92	0
4	stringdb:10116.ENSRNOP00000009776	Il22	IL22	3.97713	0.773025	1.4	0	0.714286	1	3	2	3.66667	0	3	0	0.92	0
4	stringdb:10116.ENSRNOP00000066383	Il2ra	IL2ra	-0.397787	0.632716	1.4	0	0.714286	1	3	2	3.66667	0	3	0	0.92	0	0.733333
4	stringdb:10116.ENSRNOP00000016091	Il7	IL7	-0.388126	0.73892	1	0.7	1	0.3	5	1	2.2	0	5	0	1	14
4	stringdb:10116.ENSRNOP00000027273	Cdh3	P-Cadherin	0.0151475	0.676728	0	0	0	0	0	0	0	0	0	0	Infinity	0
4	stringdb:10116.ENSRNOP00000008471	Kitlg	SCF	0.274847	0.801726	1.8	0	0.555556	0	1	2	5	0	1	0	0.84	0
4	stringdb:10116.ENSRNOP00000040482	Trem1	TREM1	-0.146648	0.78179	1.8	0	0.555556	0	1	2	5	0	1	0	0.84	0
5	stringdb:10116.ENSRNOP00000009345	Acvr1b	Activin A	0.936708	-0.667692	0	0	0	0	0	0	0	0	0	0	Infinity	0	0
5	stringdb:10116.ENSRNOP00000047891	Arhgef5	TIM1	1.35909	-0.671891	0	0	0	0	0	0	0	0	0	0	Infinity	0
5	stringdb:10116.ENSRNOP00000002089	Cd80	CD80	-124.195	-0.473229	1.5	0	0.666667	0	1	2	2	0	1	0	0.75	0	0
5	stringdb:10116.ENSRNOP00000003778	Cxcl1	CINC1	-0.375641	0.618187	1	1	1	0	2	1	1	0	2	0	1	2	0
5	stringdb:10116.ENSRNOP00000023667	Gfra1	GFRa1	0.0891758	-0.533992	0	0	0	0	0	0	0	0	0	0	Infinity	0	0
5	stringdb:10116.ENSRNOP00000047206	Nrp2	Neuropilin-2	-0.881034	0.740304	0	0	0	0	0	0	0	0	0	0	Infinity	0
5	stringdb:10116.ENSRNOP00000022944	Prl6a1	Prolactin	-1.03192	0.536208	0	0	0	0	0	0	0	0	0	0	Infinity	0
5	stringdb:10116.ENSRNOP00000004290	Timp2	TIMP2	1.20711	-0.508625	1.5	0	0.666667	0	1	2	2	0	1	0	0.75	0	0
