# Supplementary material for: Network-Level Organization of Systemic Inflammation Reflects Early Alzheimer’s-Like Behavioral Changes
Source: Research Square preprint supplement (doi:10.21203/rs.3.rs-7482654/v1), 2025-10-14
Supplement: Supplementary file 7 [file c5ce9194e73e30f2e76acb5f.xlsx]

## Sheet: Sheet1
Tnfrsf9
Activin A
Adiponectin
CD80
CD86
Beta-NGF
CD48
CINC1
CINC2
CINC3
CNTF
CCL27
Decorin
Eotaxin
EphA5
Erythropoietin
FGF-BP
FLT3LG
Fractalkine
Galectin-1
Galectin-3
Gas1
GFRa1
GMCSF
IL6ST
HGF
ICAM1
IFNg
IL1rL2
IL1r1
IL10
IL13
IL17F
IL1a
IL1b
IL2
IL2ra
IL22
IL3
IL4
IL6
IL7
JAM-A
CXCL5
L-Selectin
MCP1
MIP1a
Neuropilin-1
Neuropilin-2
Nope
Notch1
Notch2
P-Cadherin
PDGFA
Prolactin
PRLR
RAGE
RANTES
SCF
CXCL7
TIM1
TIMP1
TIMP2
TNFa
TREM1
Tnfrsf12a
VEGF

## Sheet: Sheet2
Gene	Protein	Target	Uniprot	GeneName	GeneID	Description
Tnfrsf9	4-1BB	4-1BB	Q4W8J3	Tnfrsf9	0	4-1BB homolog
Activin A	Activin A	Activin A	P18331	Activin A	29200	Inhibin beta A chain (Activin beta-A chain)
Adiponectin	Adiponectin	Adiponectin	Q8K3R4	Adiponectin	246253	30 kDa adipocyte complement-related protein (Adiponectin, C1Q and collagen domain-containing)
Beta-NGF	b-NGF	b-NGF	P25427	Beta-NGF	310738	Beta-nerve growth factor (Beta-NGF)
CD80	B7-1	B7-1	Q62624	CD80	0	B7-1
CD86	B7-2	B7-2	O35531	CD86	56822	CD86 molecule (Cd86 antigen, isoform CRA_c) (Membrane glycoprotein)
CD48	CD48	CD48	P10252	CD48	245962	CD48 antigen (BCM1 surface antigen) (BLAST-1) (MRC OX-45 surface antigen) (SLAM family member 2) (SLAMF2) (Signaling lymphocytic activation molecule 2) (CD antigen CD48)
CINC1	CINC-1	CINC-1	P14095	CINC1	81503	Growth-regulated alpha protein (C-X-C motif chemokine 1) (Cytokine-induced neutrophil chemoattractant 1) (CINC-1) (Platelet-derived growth factor-inducible protein KC)
CINC2	CINC-2	CINC-2	Q10746	CINC2	171551	C-X-C motif chemokine 3 (Cytokine-induced neutrophil chemoattractant 2) (CINC-2) (Macrophage inflammatory protein 2-alpha/beta) (MIP2-alpha/beta)
CINC3	CINC-3	CINC-3	P30348	CINC3	114105	C-X-C motif chemokine 2 (Cytokine-induced neutrophil chemoattractant 3) (CINC-3) (Macrophage inflammatory protein 2) (MIP2)
CNTF	CNTF	CNTF	P20294	CNTF	25707	Ciliary neurotrophic factor (CNTF)
CCL27	CTACK	CTACK	D4AAL6	CCL27	362505	C-C motif chemokine ligand 27 (Chemokine (C-C motif) ligand 27 (Predicted), isoform CRA_b)
Decorin	Decorin	Decorin	Q01129	Decorin	29139	Decorin (Bone proteoglycan II) (Dermatan sulfate proteoglycan-II) (DSPG) (PG-S2) (PG40)
Eotaxin	Eotaxin	Eotaxin	#N/A	Eotaxin	#N/A	#N/A
EphA5	EphA5	EphA5	P54757	EphA5	79208	Ephrin type-A receptor 5 (EC 2.7.10.1) (EPH homology kinase 1) (EHK-1)
Erythropoietin	Erythropoietin	Erythropoietin	P29676	Erythropoietin	24335	Erythropoietin
FGF-BP	FGF-BP	FGF-BP	Q9QY10	FGF-BP	64535	Fibroblast growth factor-binding protein 1 (FGF-BP) (FGF-BP1) (FGF-binding protein 1) (FGFBP-1) (Growth factor-binding protein 1)
FLT3LG	Flt-3L	Flt-3L	#N/A	FLT3LG	#N/A	#N/A
Fractalkine	Fractalkine	Fractalkine	O55145	Fractalkine	89808	Fractalkine (C-X3-C motif chemokine 1) (CX3C membrane-anchored chemokine) (Neurotactin) (Small-inducible cytokine D1) [Cleaved into: Processed fractalkine]
Galectin-1	Galectin-1	Galectin-1	P11762	Galectin-1	56646	Galectin-1 (Gal-1) (14 kDa lectin) (Beta-galactoside-binding lectin L-14-I) (Galaptin) (Lactose-binding lectin 1) (Lectin galactoside-binding soluble 1) (RL 14.5) (S-Lac lectin 1)
Galectin-3	Galectin-3	Galectin-3	P08699	Galectin-3	83781	Galectin-3 (Gal-3) (35 kDa lectin) (Carbohydrate-binding protein 35) (CBP 35) (Galactose-specific lectin 3) (IgE-binding protein) (Laminin-binding protein) (Lectin L-29) (Mac-2 antigen)
Gas1	Gas 1	Gas 1	M0RBH9	Gas1	683470	Growth arrest-specific 1
GFRa1	GFR alpha-1	GFR alpha-1	Q62997	GFRa1	25454	GDNF family receptor alpha-1 (GDNF receptor alpha-1) (GDNFR-alpha-1) (GFR-alpha-1) (RET ligand 1) (TGF-beta-related neurotrophic factor receptor 1)
GMCSF	GM-CSF	GM-CSF	P48750	GMCSF	116630	Granulocyte-macrophage colony-stimulating factor (GM-CSF) (Colony-stimulating factor) (CSF)
IL6ST	gp130	gp130	P40190	IL6ST	0	Interleukin-6 receptor subunit beta (IL-6 receptor subunit beta) (IL-6R subunit beta) (IL-6R-beta) (IL-6RB) (Interleukin-6 signal transducer) (Membrane glycoprotein 130) (gp130) (Oncostatin-M receptor subunit alpha) (CD antigen CD130)
HGF	HGF	HGF	P17945	HGF	24446	Hepatocyte growth factor (Hepatopoietin-A) (Scatter factor) (SF) [Cleaved into: Hepatocyte growth factor alpha chain; Hepatocyte growth factor beta chain]
ICAM1	ICAM-1	ICAM-1	Q00238	ICAM1	25464	Intercellular adhesion molecule 1 (ICAM-1) (CD antigen CD54)
IFNg	IFNg	IFNg	P01581	IFNg	25712	Interferon gamma (IFN-gamma)
IL1rL2	IL-1 R6	IL-1 R6	Q62929	IL1rL2	171106	Interleukin-1 receptor-like 2 (IL-36 receptor) (Interleukin-1 receptor-related protein 2) (IL-1Rrp2) (IL1R-rp2)
IL1r1	IL-1 ra	IL-1 ra	#N/A	IL1r1	#N/A	#N/A
IL10	IL-10	IL-10	P29456	IL10	25325	Interleukin-10 (IL-10) (Cytokine synthesis inhibitory factor) (CSIF)
IL13	IL-13	IL-13	P42203	IL13	116553	Interleukin-13 (IL-13) (T-cell activation protein P600)
IL17F	IL-17F	IL-17F	Q5BJ95	IL17F	301291	Interleukin-17F (IL-17F)
IL1a	IL-1a	IL-1a	P16598	IL1a	24493	Interleukin-1 alpha (IL-1 alpha)
IL1b	IL-1b	IL-1b	Q63264	IL1b	0	Interleukin-1 beta (IL-1 beta)
IL2	IL-2	IL-2	P17108	IL2	116562	Interleukin-2 (IL-2) (T-cell growth factor) (TCGF)
IL2ra	IL-2 Ra	IL-2 Ra	P26897	IL2ra	25704	Interleukin-2 receptor subunit alpha (IL-2 receptor subunit alpha) (IL-2-RA) (IL-2R subunit alpha) (IL2-RA) (CD antigen CD25)
IL22	IL-22	IL-22	G3V6X6	IL22	500836	Interleukin 22 (Similar to TIF alpha protein (Predicted))
IL3	IL-3	IL-3	P04823	IL3	0	Interleukin-3 (IL-3) (Hematopoietic growth factor) (Mast cell growth factor) (MCGF) (Multipotential colony-stimulating factor) (P-cell-stimulating factor)
IL4	IL-4	IL-4	P20096	IL4	287287	Interleukin-4 (IL-4) (B-cell IGG differentiation factor) (B-cell growth factor 1) (B-cell stimulatory factor 1) (BSF-1) (Lymphocyte stimulatory factor 1)
IL6	IL-6	IL-6	P20607	IL6	24498	Interleukin-6 (IL-6)
IL7	IL-7	IL-7	P56478	IL7	0	Interleukin-7 (IL-7)
JAM-A	JAM-A	JAM-A	Q9JHY1	JAM-A	116479	Junctional adhesion molecule A (JAM-A) (Junctional adhesion molecule 1) (JAM-1) (CD antigen CD321)
L-Selectin	L-Selectin	L-Selectin	P30836	L-Selectin	0	L-selectin (CD62 antigen-like family member L) (Leukocyte adhesion molecule 1) (LAM-1) (Leukocyte-endothelial cell adhesion molecule 1) (LECAM1) (Lymph node homing receptor) (Lymphocyte antigen 22) (Ly-22) (Lymphocyte surface MEL-14 antigen) (CD antigen CD62L)
CXCL5	LIX	LIX	P97885	CXCL5	60665	C-X-C motif chemokine 5 (Cytokine LIX) (Small-inducible cytokine B5)
MCP1	MCP-1	MCP-1	P14844	MCP1	24770	C-C motif chemokine 2 (Immediate-early serum-responsive protein JE) (Monocyte chemoattractant protein 1) (Monocyte chemotactic protein 1) (MCP-1) (Small-inducible cytokine A2)
MIP1a	MIP-1a	MIP-1a	P50229	MIP1a	25542	C-C motif chemokine 3 (Macrophage inflammatory protein 1-alpha) (MIP-1-alpha) (Small-inducible cytokine A3)
Neuropilin-1	Neuropilin-1	Neuropilin-1	Q9QWJ9	Neuropilin-1	246331	Neuropilin-1 (Vascular endothelial cell growth factor 165 receptor) (CD antigen CD304)
Neuropilin-2	Neuropilin-2	Neuropilin-2	O35276	Neuropilin-2	81527	Neuropilin-2 (Vascular endothelial cell growth factor 165 receptor 2)
Nope	Nope	Nope	B5DFA9	Nope	0	Nope protein (Fragment)
Notch1	Notch-1	Notch-1	Q07008	Notch1	25496	Neurogenic locus notch homolog protein 1 (Notch 1) [Cleaved into: Notch 1 extracellular truncation (NEXT); Notch 1 intracellular domain (NICD)]
Notch2	Notch-2	Notch-2	Q9QW30	Notch2	0	Neurogenic locus notch homolog protein 2 (Notch 2) [Cleaved into: Notch 2 extracellular truncation; Notch 2 intracellular domain]
P-Cadherin	P-Cadherin	P-Cadherin	F1LMI3	P-Cadherin	116777	Cadherin 3, type 1, P-cadherin (Placental)
PDGFA	PDGF-AA	PDGF-AA	P28576	PDGFA	25266	Platelet-derived growth factor subunit A (PDGF subunit A) (PDGF-1) (Platelet-derived growth factor A chain) (Platelet-derived growth factor alpha polypeptide)
Prolactin	Prolactin	Prolactin	P01237	Prolactin	24683	Prolactin (PRL)
PRLR	Prolactin R	Prolactin R	P05710	PRLR	24684	Prolactin receptor (PRL-R) (Lactogen receptor)
RAGE	RAGE	RAGE	Q63495	RAGE	0	Advanced glycosylation end product-specific receptor (Receptor for advanced glycosylation end products)
RANTES	RANTES	RANTES	P50231	RANTES	0	C-C motif chemokine 5 (SIS-delta) (Small-inducible cytokine A5) (T-cell-specific protein RANTES)
SCF	SCF	SCF	P21581	SCF	60427	Kit ligand (Hematopoietic growth factor KL) (Mast cell growth factor) (MGF) (Stem cell factor) (SCF) (c-Kit ligand) [Cleaved into: Soluble KIT ligand (sKITLG)]
CXCL7	TCK-1	TCK-1	Q99ME0	CXCL7	246358	CXC chemokine RTCK1 (Chemokine (C-X-C motif) ligand 7, isoform CRA_b) (Pro-platelet basic protein)
TIM1	TIM-1	TIM-1	O54947	TIM1	286934	Hepatitis A virus cellular receptor 1 homolog (HAVcr-1) (Kidney injury molecule 1) (KIM-1) (T cell immunoglobulin and mucin domain-containing protein 1) (TIMD-1)
TIMP1	TIMP-1	TIMP-1	P30120	TIMP1	116510	Metalloproteinase inhibitor 1 (Tissue inhibitor of metalloproteinases 1) (TIMP-1)
TIMP2	TIMP-2	TIMP-2	P30121	TIMP2	29543	Metalloproteinase inhibitor 2 (Tissue inhibitor of metalloproteinases 2) (TIMP-2)
TNFa	TNFa	TNFa	P16599	TNFa	24835	Tumor necrosis factor (Cachectin) (TNF-alpha) (Tumor necrosis factor ligand superfamily member 2) (TNF-a) [Cleaved into: Tumor necrosis factor, membrane form (N-terminal fragment) (NTF); Intracellular domain 1 (ICD1); Intracellular domain 2 (ICD2); C-domain 1; C-domain 2; Tumor necrosis factor, soluble form]
TREM1	TREM-1	TREM-1	D4ABU7	TREM1	301229	Triggering receptor-expressed on myeloid cells 1
Tnfrsf12a	TWEAK R	TWEAK R	Q80XX9	Tnfrsf12a	302965	Tumor necrosis factor receptor superfamily, member 12a (Type 1 transmembrane protein FN14)
VEGF	VEGF	VEGF	#N/A	VEGF	#N/A	#N/A

## Sheet: Sheet3
Target	Uniprot	GeneName	GeneID	Description
4-1BB	Q4W8J3	4-1BB	0	4-1BB homolog
Activin A	P18331	Inhba	29200	Inhibin beta A chain (Activin beta-A chain)
Adiponectin	Q8K3R4	Adipoq Acdc	246253	30 kDa adipocyte complement-related protein (Adiponectin, C1Q and collagen domain-containing)
b-NGF	P25427	Ngf Ngfb	310738	Beta-nerve growth factor (Beta-NGF)
B7-1	Q62624	0	0	B7-1
B7-2	O35531	Cd86 rCG_52586	56822	CD86 molecule (Cd86 antigen, isoform CRA_c) (Membrane glycoprotein)
CD48	P10252	Cd48 Bcm-1	245962	CD48 antigen (BCM1 surface antigen) (BLAST-1) (MRC OX-45 surface antigen) (SLAM family member 2) (SLAMF2) (Signaling lymphocytic activation molecule 2) (CD antigen CD48)
CINC-1	P14095	Cxcl1 Cinc1 Gro Scyb1	81503	Growth-regulated alpha protein (C-X-C motif chemokine 1) (Cytokine-induced neutrophil chemoattractant 1) (CINC-1) (Platelet-derived growth factor-inducible protein KC)
CINC-2	Q10746	Cxcl3 Cinc2	171551	C-X-C motif chemokine 3 (Cytokine-induced neutrophil chemoattractant 2) (CINC-2) (Macrophage inflammatory protein 2-alpha/beta) (MIP2-alpha/beta)
CINC-3	P30348	Cxcl2 Cinc3 Mip-2 Mip2 Scyb2	114105	C-X-C motif chemokine 2 (Cytokine-induced neutrophil chemoattractant 3) (CINC-3) (Macrophage inflammatory protein 2) (MIP2)
CNTF	P20294	Cntf	25707	Ciliary neurotrophic factor (CNTF)
CTACK	D4AAL6	Ccl27	362505	C-C motif chemokine ligand 27 (Chemokine (C-C motif) ligand 27 (Predicted), isoform CRA_b)
Decorin	Q01129	Dcn	29139	Decorin (Bone proteoglycan II) (Dermatan sulfate proteoglycan-II) (DSPG) (PG-S2) (PG40)
Eotaxin	#N/A	#N/A	#N/A	#N/A
EphA5	P54757	Epha5 Ehk-1 Ekh1 Rek7	79208	Ephrin type-A receptor 5 (EC 2.7.10.1) (EPH homology kinase 1) (EHK-1)
Erythropoietin	P29676	Epo	24335	Erythropoietin
FGF-BP	Q9QY10	Fgfbp1	64535	Fibroblast growth factor-binding protein 1 (FGF-BP) (FGF-BP1) (FGF-binding protein 1) (FGFBP-1) (Growth factor-binding protein 1)
Flt-3L	#N/A	#N/A	#N/A	#N/A
Fractalkine	O55145	Cx3cl1 Acc1 Fkn Scyd1	89808	Fractalkine (C-X3-C motif chemokine 1) (CX3C membrane-anchored chemokine) (Neurotactin) (Small-inducible cytokine D1) [Cleaved into: Processed fractalkine]
Galectin-1	P11762	Lgals1	56646	Galectin-1 (Gal-1) (14 kDa lectin) (Beta-galactoside-binding lectin L-14-I) (Galaptin) (Lactose-binding lectin 1) (Lectin galactoside-binding soluble 1) (RL 14.5) (S-Lac lectin 1)
Galectin-3	P08699	Lgals3	83781	Galectin-3 (Gal-3) (35 kDa lectin) (Carbohydrate-binding protein 35) (CBP 35) (Galactose-specific lectin 3) (IgE-binding protein) (Laminin-binding protein) (Lectin L-29) (Mac-2 antigen)
Gas 1	M0RBH9	Gas1 LOC683470	683470	Growth arrest-specific 1
GFR alpha-1	Q62997	Gfra1 Gdnfra Retl1 Trnr1	25454	GDNF family receptor alpha-1 (GDNF receptor alpha-1) (GDNFR-alpha-1) (GFR-alpha-1) (RET ligand 1) (TGF-beta-related neurotrophic factor receptor 1)
GM-CSF	P48750	Csf2 Csfgm	116630	Granulocyte-macrophage colony-stimulating factor (GM-CSF) (Colony-stimulating factor) (CSF)
gp130	P40190	Il6st	0	Interleukin-6 receptor subunit beta (IL-6 receptor subunit beta) (IL-6R subunit beta) (IL-6R-beta) (IL-6RB) (Interleukin-6 signal transducer) (Membrane glycoprotein 130) (gp130) (Oncostatin-M receptor subunit alpha) (CD antigen CD130)
HGF	P17945	Hgf	24446	Hepatocyte growth factor (Hepatopoietin-A) (Scatter factor) (SF) [Cleaved into: Hepatocyte growth factor alpha chain; Hepatocyte growth factor beta chain]
ICAM-1	Q00238	Icam1 Icam-1	25464	Intercellular adhesion molecule 1 (ICAM-1) (CD antigen CD54)
IFNg	P01581	Ifng	25712	Interferon gamma (IFN-gamma)
IL-1 R6	Q62929	Il1rl2	171106	Interleukin-1 receptor-like 2 (IL-36 receptor) (Interleukin-1 receptor-related protein 2) (IL-1Rrp2) (IL1R-rp2)
IL-1 ra	#N/A	#N/A	#N/A	#N/A
IL-10	P29456	Il10 Il-10	25325	Interleukin-10 (IL-10) (Cytokine synthesis inhibitory factor) (CSIF)
IL-13	P42203	Il13 Il-13	116553	Interleukin-13 (IL-13) (T-cell activation protein P600)
IL-17F	Q5BJ95	Il17f	301291	Interleukin-17F (IL-17F)
IL-1a	P16598	Il1a	24493	Interleukin-1 alpha (IL-1 alpha)
IL-1b	Q63264	Il1b	0	Interleukin-1 beta (IL-1 beta)
IL-2	P17108	Il2 Il-2	116562	Interleukin-2 (IL-2) (T-cell growth factor) (TCGF)
IL-2 Ra	P26897	Il2ra	25704	Interleukin-2 receptor subunit alpha (IL-2 receptor subunit alpha) (IL-2-RA) (IL-2R subunit alpha) (IL2-RA) (CD antigen CD25)
IL-22	G3V6X6	Il22	500836	Interleukin 22 (Similar to TIF alpha protein (Predicted))
IL-3	P04823	Il3 Il-3	0	Interleukin-3 (IL-3) (Hematopoietic growth factor) (Mast cell growth factor) (MCGF) (Multipotential colony-stimulating factor) (P-cell-stimulating factor)
IL-4	P20096	Il4 Il-4	287287	Interleukin-4 (IL-4) (B-cell IGG differentiation factor) (B-cell growth factor 1) (B-cell stimulatory factor 1) (BSF-1) (Lymphocyte stimulatory factor 1)
IL-6	P20607	Il6 Il-6	24498	Interleukin-6 (IL-6)
IL-7	P56478	Il7	0	Interleukin-7 (IL-7)
JAM-A	Q9JHY1	F11r Jam1	116479	Junctional adhesion molecule A (JAM-A) (Junctional adhesion molecule 1) (JAM-1) (CD antigen CD321)
L-Selectin	P30836	Sell Lnhr Ly-22	0	L-selectin (CD62 antigen-like family member L) (Leukocyte adhesion molecule 1) (LAM-1) (Leukocyte-endothelial cell adhesion molecule 1) (LECAM1) (Lymph node homing receptor) (Lymphocyte antigen 22) (Ly-22) (Lymphocyte surface MEL-14 antigen) (CD antigen CD62L)
LIX	P97885	Cxcl5 Scyb5	60665	C-X-C motif chemokine 5 (Cytokine LIX) (Small-inducible cytokine B5)
MCP-1	P14844	Ccl2 Je Mcp1 Scya2	24770	C-C motif chemokine 2 (Immediate-early serum-responsive protein JE) (Monocyte chemoattractant protein 1) (Monocyte chemotactic protein 1) (MCP-1) (Small-inducible cytokine A2)
MIP-1a	P50229	Ccl3 Mip1a Scya3	25542	C-C motif chemokine 3 (Macrophage inflammatory protein 1-alpha) (MIP-1-alpha) (Small-inducible cytokine A3)
Neuropilin-1	Q9QWJ9	Nrp1	246331	Neuropilin-1 (Vascular endothelial cell growth factor 165 receptor) (CD antigen CD304)
Neuropilin-2	O35276	Nrp2	81527	Neuropilin-2 (Vascular endothelial cell growth factor 165 receptor 2)
Nope	B5DFA9	Nope	0	Nope protein (Fragment)
Notch-1	Q07008	Notch1	25496	Neurogenic locus notch homolog protein 1 (Notch 1) [Cleaved into: Notch 1 extracellular truncation (NEXT); Notch 1 intracellular domain (NICD)]
Notch-2	Q9QW30	Notch2	0	Neurogenic locus notch homolog protein 2 (Notch 2) [Cleaved into: Notch 2 extracellular truncation; Notch 2 intracellular domain]
P-Cadherin	F1LMI3	Cdh3 rCG_51631	116777	Cadherin 3, type 1, P-cadherin (Placental)
PDGF-AA	P28576	Pdgfa Rpa1	25266	Platelet-derived growth factor subunit A (PDGF subunit A) (PDGF-1) (Platelet-derived growth factor A chain) (Platelet-derived growth factor alpha polypeptide)
Prolactin	P01237	Prl	24683	Prolactin (PRL)
Prolactin R	P05710	Prlr	24684	Prolactin receptor (PRL-R) (Lactogen receptor)
RAGE	Q63495	Ager Rage	0	Advanced glycosylation end product-specific receptor (Receptor for advanced glycosylation end products)
RANTES	P50231	Ccl5 Scya5	0	C-C motif chemokine 5 (SIS-delta) (Small-inducible cytokine A5) (T-cell-specific protein RANTES)
SCF	P21581	Kitlg Kitl Mgf	60427	Kit ligand (Hematopoietic growth factor KL) (Mast cell growth factor) (MGF) (Stem cell factor) (SCF) (c-Kit ligand) [Cleaved into: Soluble KIT ligand (sKITLG)]
TCK-1	Q99ME0	Ppbp Cxcl7 Rtck1	246358	CXC chemokine RTCK1 (Chemokine (C-X-C motif) ligand 7, isoform CRA_b) (Pro-platelet basic protein)
TIM-1	O54947	Havcr1 Kim1	286934	Hepatitis A virus cellular receptor 1 homolog (HAVcr-1) (Kidney injury molecule 1) (KIM-1) (T cell immunoglobulin and mucin domain-containing protein 1) (TIMD-1)
TIMP-1	P30120	Timp1 Timp-1	116510	Metalloproteinase inhibitor 1 (Tissue inhibitor of metalloproteinases 1) (TIMP-1)
TIMP-2	P30121	Timp2 Timp-2	29543	Metalloproteinase inhibitor 2 (Tissue inhibitor of metalloproteinases 2) (TIMP-2)
TNFa	P16599	Tnf Tnfa Tnfsf2	24835	Tumor necrosis factor (Cachectin) (TNF-alpha) (Tumor necrosis factor ligand superfamily member 2) (TNF-a) [Cleaved into: Tumor necrosis factor, membrane form (N-terminal fragment) (NTF); Intracellular domain 1 (ICD1); Intracellular domain 2 (ICD2); C-domain 1; C-domain 2; Tumor necrosis factor, soluble form]
TREM-1	D4ABU7	Trem1	301229	Triggering receptor-expressed on myeloid cells 1
TWEAK R	Q80XX9	Tnfrsf12a	302965	Tumor necrosis factor receptor superfamily, member 12a (Type 1 transmembrane protein FN14)
VEGF	#N/A	#N/A	#N/A	#N/A
