# Supplementary material for: Network-Level Organization of Systemic Inflammation Reflects Early Alzheimer’s-Like Behavioral Changes
Source: Research Square preprint supplement (doi:10.21203/rs.3.rs-7482654/v1), 2025-10-14
Supplement: Supplementary file 8 [file c86fff8b622809217c8cafce.xlsx]

## Sheet: KEGG
Term	Overlap	P-value	Adjusted P-value	#NAME?	Old P-value	Old Adjusted P-value	Odds Ratio	Combined Score	Genes
Cytokine-cytokine receptor interaction	4/295	1.57e-06	2.04e-05	4.69	0	0	90.2726	1206.59	IL22;IL7;IL2RA;IL17F
Th17 cell differentiation	3/107	5.13e-06	3.33e-05	4.48	0	0	143.43	1747.04	IL22;IL2RA;IL17F
JAK-STAT signaling pathway	3/162	1.78e-05	7.73e-05	4.11	0	0	93.5566	1023.02	IL22;IL7;IL2RA
Inflammatory bowel disease	1965-02-01	0.000216	0.000702	3.15	0	0	126.54	1067.95	IL22;IL17F
Hematopoietic cell lineage	1999-02-01	0.000501	0.00130309	2.89	0	0	82.0454	623.424	IL7;IL2RA
PI3K-Akt signaling pathway	2/354	0.0061858	0.0134026	1.87	0	0	22.3193	113.505	IL7;IL2RA
Pathways in cancer	2/531	0.0135233	0.0251148	1.6	0	0	14.7176	63.3347	IL7;IL2RA
Th1 and Th2 cell differentiation	1992-01-01	0.0317635	0.0448295	1.35	0	0	36.4505	125.734	IL2RA
IL-17 signaling pathway	1994-01-01	0.0324443	0.0448295	1.35	0	0	35.6631	122.261	IL17F
Viral protein interaction with cytokine and cytokine receptor	1/100	0.0344842	0.0448295	1.35	0	0	33.4916	112.775	IL2RA
Measles	1/139	0.0476541	0.0563185	1.25	0	0	23.9795	72.9884	IL2RA
Human T-cell leukemia virus 1 infection	1/219	0.074188	0.0803703	1.09	0	0	15.1185	39.3255	IL2RA
Endocytosis	1/252	0.0849471	0.0849471	1.07	0	0	13.1089	32.323	IL2RA

## Sheet: Reactome
Term	Overlap	P-value	Adjusted P-value	#NAME?	Old P-value	Old Adjusted P-value	Odds Ratio	Combined Score	Genes
Signaling by Interleukins	4/452	8.54e-06	0.000307	3.51	0	0	58.1696	678.908	IL22;IL7;IL2RA;IL17F
Cytokine Signaling in Immune System	4/776	7.17e-05	0.00129001	2.89	0	0	33.1969	316.814	IL22;IL7;IL2RA;IL17F
Immune System	1950-05-01	0.000249	0.00298813	2.52	0	0	20.8019	172.614	IL22;IL7;IL2RA;IL17F;TREM1
RUNX1 and FOXP3 Control the Development of Regulatory T Lymphocytes (Tregs)	2025-01-10	0.00349522	0.0301897	1.52	0	0	370.074	2093.27	IL2RA
Interleukin-2 Signaling	2025-01-12	0.00419301	0.0301897	1.52	0	0	302.758	1657.4	IL2RA
Interleukin-7 Signaling	2025-01-25	0.00871846	0.042359	1.37	0	0	138.674	657.634	IL7
Interleukin-20 Family Signaling	2025-01-26	0.00906584	0.042359	1.37	0	0	133.12	626.095	IL22
Interleukin Receptor SHC Signaling	2025-01-27	0.00941312	0.042359	1.37	0	0	127.994	597.173	IL2RA
Interleukin-2 Family Signaling	1944-01-01	0.0153009	0.0545952	1.26	0	0	77.3256	323.209	IL2RA
DAP12 Interactions	1945-01-01	0.0156463	0.0545952	1.26	0	0	75.5644	314.161	TREM1
Interleukin-3, Interleukin-5 and GM-CSF Signaling	1948-01-01	0.0166819	0.0545952	1.26	0	0	70.7305	289.531	IL2RA
Interleukin-17 Signaling	1972-01-01	0.024933	0.074799	1.13	0	0	46.7653	172.637	IL17F
Signaling by ALK Fusions and Activated Point Mutants	1993-01-01	0.032104	0.0825531	1.08	0	0	36.0525	123.977	IL22
Signaling by ALK in Cancer	1993-01-01	0.032104	0.0825531	1.08	0	0	36.0525	123.977	IL22
Interleukin-4 and Interleukin-13 Signaling	1/112	0.038553	0.0925273	1.03	0	0	29.8529	97.1925	IL17F
SARS-CoV-2 Activates Modulates Innate and Adaptive Immune Responses	1/138	0.0473183	0.106466	0.973	0	0	24.1557	73.6957	IL17F
Transcriptional Regulation by RUNX1	1/202	0.0686032	0.141778	0.848	0	0	16.4113	43.9726	IL2RA
SARS-CoV-2-host Interactions	1/218	0.0738603	0.141778	0.848	0	0	15.1889	39.576	IL17F
Immunoregulatory Interactions Between a Lymphoid and a non-Lymphoid Cell	1/223	0.0754979	0.141778	0.848	0	0	14.8431	38.3494	TREM1
Cell Surface Interactions at the Vascular Wall	1/233	0.0787656	0.141778	0.848	0	0	14.1961	36.0763	TREM1
RAF MAP Kinase Cascade	1/265	0.0891561	0.149061	0.827	0	0	12.4552	30.1087	IL2RA
MAPK1 MAPK3 Signaling	1/271	0.0910931	0.149061	0.827	0	0	12.1747	29.169	IL2RA
SARS-CoV-2 Infection	1/313	0.104553	0.157308	0.803	0	0	10.5134	23.7398	IL17F
MAPK Family Signaling Cascades	1/314	0.104872	0.157308	0.803	0	0	10.4792	23.6309	IL2RA
Diseases of Signal Transduction by Growth Factor Receptors and Second Messengers	1/451	0.147584	0.212521	0.673	0	0	7.23815	13.8492	IL22
SARS-CoV Infections	1/498	0.161829	0.221522	0.655	0	0	6.53789	11.9069	IL17F
Disease	1931-02-01	0.166142	0.221522	0.655	0	0	3.35632	6.0243	IL22;IL17F
Hemostasis	1/707	0.22273	0.286367	0.543	0	0	4.55312	6.83785	TREM1
Adaptive Immune System	1/854	0.263256	0.326801	0.486	0	0	3.73974	4.99116	TREM1
Viral Infection Pathways	1/1029	0.309129	0.370954	0.431	0	0	3.07474	3.60974	IL17F
Innate Immune System	1/1149	0.339149	0.393851	0.405	0	0	2.73592	2.95839	TREM1
Generic Transcription Pathway	1/1230	0.358775	0.403622	0.394	0	0	2.54462	2.60838	IL2RA
Infectious Disease	1/1311	0.377899	0.412125	0.385	0	0	2.37697	2.3131	IL17F
RNA Polymerase II Transcription	1/1360	0.389229	0.412125	0.385	0	0	2.28526	2.15634	IL2RA
Gene Expression (Transcription)	1/1615	0.44538	0.458105	0.339	0	0	1.89787	1.53505	IL2RA
Signal Transduction	2025-01-13	0.624772	0.624772	0.204	0	0	1.10905	0.521661	IL2RA

## Sheet: GO_BP
Term	Overlap	P-value	Adjusted P-value	#NAME?	Old P-value	Old Adjusted P-value	Odds Ratio	Combined Score	Genes
Cytokine-Mediated Signaling Pathway (GO:0019221)	3/255	6.9e-05	0.00538432	2.27	0	0	58.753	562.911	IL7;IL2RA;IL17F
Positive Regulation of Chemokine Production (GO:0032722)	1954-02-01	0.000149	0.00580942	2.24	0	0	153.392	1351.67	IL7;IL17F
Regulation of T Cell Tolerance Induction (GO:0002664)	2025-01-06	0.00209839	0.0198334	1.7	0	0	666.267	4108.59	IL2RA
Positive Regulation of Interleukin-23 Production (GO:0032747)	2025-01-06	0.00209839	0.0198334	1.7	0	0	666.267	4108.59	IL17F
Interleukin-2-Mediated Signaling Pathway (GO:0038110)	2025-01-07	0.00244775	0.0198334	1.7	0	0	555.194	3338.15	IL2RA
Interleukin-7-Mediated Signaling Pathway (GO:0038111)	2025-01-07	0.00244775	0.0198334	1.7	0	0	555.194	3338.15	IL7
Cellular Response to Interleukin-2 (GO:0071352)	2025-01-07	0.00244775	0.0198334	1.7	0	0	555.194	3338.15	IL2RA
Cellular Response to Interleukin-7 (GO:0098761)	2025-01-07	0.00244775	0.0198334	1.7	0	0	555.194	3338.15	IL7
Apoptotic Process (GO:0006915)	2/232	0.00270764	0.0198334	1.7	0	0	34.3704	203.187	IL2RA;IL17F
Regulation of Interleukin-23 Production (GO:0032667)	2025-01-08	0.00279701	0.0198334	1.7	0	0	475.857	2797.66	IL17F
Bone Resorption (GO:0045453)	2025-01-08	0.00279701	0.0198334	1.7	0	0	475.857	2797.66	IL7
Inflammatory Response (GO:0006954)	2/261	0.00341191	0.0221774	1.65	0	0	30.4772	173.125	IL22;IL2RA
Regulation of Granulocyte Macrophage Colony-Stimulating Factor Production (GO:0032645)	2025-01-14	0.00489039	0.02543	1.59	0	0	256.154	1362.86	IL17F
Acute-Phase Response (GO:0006953)	2025-01-14	0.00489039	0.02543	1.59	0	0	256.154	1362.86	IL22
Positive Regulation of Response to Cytokine Stimulus (GO:0060760)	2025-01-14	0.00489039	0.02543	1.59	0	0	256.154	1362.86	IL7
Positive Regulation of Cytokine Production (GO:0001819)	2/325	0.0052379	0.0255348	1.59	0	0	24.3591	127.93	IL7;IL17F
Positive Regulation of Cytokine Production Involved in Inflammatory Response (GO:1900017)	2025-01-18	0.00628388	0.0286547	1.54	0	0	195.843	992.879	IL17F
Positive Regulation of Osteoclast Differentiation (GO:0045672)	2025-01-20	0.00698	0.0286547	1.54	0	0	175.211	869.869	IL17F
Regulation of Cellular Response to Transforming Growth Factor Beta Stimulus (GO:1903844)	2025-01-20	0.00698	0.0286547	1.54	0	0	175.211	869.869	IL17F
Acute Inflammatory Response (GO:0002526)	2025-01-24	0.00837098	0.0326468	1.49	0	0	144.71	692.146	IL22
Regulation of Transmembrane Receptor Protein Serine/Threonine Kinase Signaling Pathway (GO:0090092)	2025-01-28	0.00976029	0.0362525	1.44	0	0	123.247	570.563	IL17F
Positive Regulation of B Cell Proliferation (GO:0030890)	2025-01-30	0.0104543	0.0370653	1.43	0	0	114.736	523.279	IL7
Positive Regulation of Interleukin-12 Production (GO:0032735)	1933-01-01	0.0114946	0.0376388	1.42	0	0	103.964	464.289	IL17F
Positive Regulation of Lymphocyte Differentiation (GO:0045621)	1939-01-01	0.0135723	0.0376388	1.42	0	0	87.5219	376.32	IL7
Regulation of Cytokine-Mediated Signaling Pathway (GO:0001959)	1940-01-01	0.0139182	0.0376388	1.42	0	0	85.2735	364.506	IL7
Connective Tissue Development (GO:0061448)	1941-01-01	0.014264	0.0376388	1.42	0	0	83.1375	353.335	IL17F
Positive Regulation of Myeloid Leukocyte Differentiation (GO:0002763)	1943-01-01	0.0149554	0.0376388	1.42	0	0	79.1706	332.729	IL17F
Neutrophil Chemotaxis (GO:0030593)	1943-01-01	0.0149554	0.0376388	1.42	0	0	79.1706	332.729	TREM1
Regulation of Chemokine Production (GO:0032642)	1943-01-01	0.0149554	0.0376388	1.42	0	0	79.1706	332.729	IL7
Regulation of B Cell Proliferation (GO:0030888)	1945-01-01	0.0156463	0.0376388	1.42	0	0	75.5644	314.161	IL7
Regulation of Osteoclast Differentiation (GO:0045670)	1946-01-01	0.0159916	0.0376388	1.42	0	0	73.8815	305.551	IL17F
Regulation of T Cell Differentiation (GO:0045580)	1947-01-01	0.0163368	0.0376388	1.42	0	0	72.2717	297.35	IL7
Positive Regulation of Cytokine-Mediated Signaling Pathway (GO:0001961)	1947-01-01	0.0163368	0.0376388	1.42	0	0	72.2717	297.35	IL7
Regulation of Interleukin-12 Production (GO:0032655)	1950-01-01	0.0173717	0.0376388	1.42	0	0	67.8367	274.936	IL17F
Regulation of Interleukin-2 Production (GO:0032663)	1950-01-01	0.0173717	0.0376388	1.42	0	0	67.8367	274.936	IL17F
Neutrophil Migration (GO:1990266)	1950-01-01	0.0173717	0.0376388	1.42	0	0	67.8367	274.936	TREM1
Positive Regulation of B Cell Activation (GO:0050871)	1953-01-01	0.0184058	0.0385769	1.41	0	0	63.9135	255.34	IL7
Regulation of Cytokine Production Involved in Inflammatory Response (GO:1900015)	1955-01-01	0.0190946	0.0385769	1.41	0	0	61.5401	243.597	IL17F
Positive Regulation of Interleukin-1 Beta Production (GO:0032731)	1956-01-01	0.0194389	0.0385769	1.41	0	0	60.4182	238.077	IL17F
Cartilage Development (GO:0051216)	1957-01-01	0.019783	0.0385769	1.41	0	0	59.3363	232.772	IL17F
Positive Regulation of Interleukin-1 Production (GO:0032732)	1963-01-01	0.0218458	0.0402502	1.4	0	0	53.578	204.869	IL17F
Granulocyte Chemotaxis (GO:0071621)	1964-01-01	0.0221892	0.0402502	1.4	0	0	52.7249	200.784	TREM1
Positive Regulation of T Cell Differentiation (GO:0045582)	1964-01-01	0.0221892	0.0402502	1.4	0	0	52.7249	200.784	IL7
Positive Regulation of Interleukin-6 Production (GO:0032755)	1977-01-01	0.0266445	0.0456776	1.34	0	0	43.6776	158.339	IL17F
Positive Regulation of Lymphocyte Proliferation (GO:0050671)	1977-01-01	0.0266445	0.0456776	1.34	0	0	43.6776	158.339	IL7
Positive Regulation of Tumor Necrosis Factor Production (GO:0032760)	1982-01-01	0.0283534	0.0456776	1.34	0	0	40.9712	145.981	IL17F
Regulation of Interleukin-1 Beta Production (GO:0032651)	1982-01-01	0.0283534	0.0456776	1.34	0	0	40.9712	145.981	IL17F
Negative Regulation of Blood Vessel Morphogenesis (GO:2000181)	1982-01-01	0.0283534	0.0456776	1.34	0	0	40.9712	145.981	IL17F
Regulation of Interleukin-8 Production (GO:0032677)	1983-01-01	0.0286949	0.0456776	1.34	0	0	40.4695	143.709	IL17F
Positive Regulation of Tumor Necrosis Factor Superfamily Cytokine Production (GO:1903557)	1985-01-01	0.0293775	0.0458289	1.34	0	0	39.502	139.344	IL17F
Defense Response to Gram-negative Bacterium (GO:0050829)	1987-01-01	0.0300598	0.0459738	1.34	0	0	38.5795	135.204	TREM1
Negative Regulation of Angiogenesis (GO:0016525)	1993-01-01	0.032104	0.0472474	1.33	0	0	36.0525	123.977	IL17F
Regulation of Protein Metabolic Process (GO:0051246)	1993-01-01	0.032104	0.0472474	1.33	0	0	36.0525	123.977	IL17F
Positive Regulation of T Cell Activation (GO:0050870)	1/111	0.0382145	0.0551988	1.26	0	0	30.1258	98.3467	IL7
Regulation of Interleukin-6 Production (GO:0032675)	1/114	0.0392297	0.0556349	1.25	0	0	29.3215	94.9525	IL17F
Regulation of Transforming Growth Factor Beta Receptor Signaling Pathway (GO:0017015)	1/120	0.0412574	0.0559381	1.25	0	0	27.8347	88.7351	IL17F
Negative Regulation of Defense Response (GO:0031348)	1/121	0.041595	0.0559381	1.25	0	0	27.6014	87.7662	IL22
Negative Regulation of Inflammatory Response (GO:0050728)	1/121	0.041595	0.0559381	1.25	0	0	27.6014	87.7662	IL22
Regulation of Tumor Necrosis Factor Production (GO:0032680)	1/131	0.0449652	0.0594455	1.23	0	0	25.4654	78.9902	IL17F
Negative Regulation of Response to External Stimulus (GO:0032102)	1/154	0.0526782	0.0684817	1.16	0	0	21.6122	63.6167	IL22
Skeletal System Development (GO:0001501)	1/160	0.0546815	0.0699207	1.16	0	0	20.7904	60.4215	IL17F
Regulation of Cytokine Production (GO:0001817)	1/172	0.0586772	0.0738197	1.13	0	0	19.3197	54.7849	IL17F
Positive Regulation of Protein Metabolic Process (GO:0051247)	1/202	0.0686032	0.0849373	1.07	0	0	16.4113	43.9726	IL17F
Regulation of Angiogenesis (GO:0045765)	1/211	0.0715634	0.0872179	1.06	0	0	15.7008	41.4057	IL17F
Regulation of Inflammatory Response (GO:0050727)	1/249	0.0839735	0.100768	0.997	0	0	13.2695	32.8719	IL22
Positive Regulation of Signal Transduction (GO:0009967)	1/256	0.086244	0.101925	0.992	0	0	12.9007	31.614	IL7
Cellular Response to Cytokine Stimulus (GO:0071345)	1/289	0.0968828	0.112789	0.948	0	0	11.4034	26.6183	IL7
Negative Regulation of Programmed Cell Death (GO:0043069)	1/382	0.126296	0.144869	0.839	0	0	8.57918	17.7514	IL7
Positive Regulation of Multicellular Organismal Process (GO:0051240)	1/407	0.134061	0.151547	0.819	0	0	8.04064	16.1573	IL17F
Positive Regulation of Gene Expression (GO:0010628)	1/436	0.142994	0.159337	0.798	0	0	7.49349	14.5745	IL17F
Negative Regulation of Apoptotic Process (GO:0043066)	1/475	0.154884	0.170154	0.769	0	0	6.86322	12.8005	IL7
Positive Regulation of Cell Population Proliferation (GO:0008284)	1/484	0.157607	0.170741	0.768	0	0	6.73223	12.4388	IL7
Positive Regulation of Cellular Process (GO:0048522)	1/622	0.198436	0.212027	0.674	0	0	5.19914	8.40852	IL7
Regulation of Apoptotic Process (GO:0042981)	1/704	0.221883	0.233877	0.631	0	0	4.57326	6.88551	IL7
Regulation of Cell Population Proliferation (GO:0042127)	1/769	0.24005	0.249652	0.603	0	0	4.17209	5.95319	IL7
Positive Regulation of Transcription by RNA Polymerase II (GO:0045944)	1/983	0.297315	0.305139	0.516	0	0	3.22658	3.91372	IL17F
Positive Regulation of DNA-templated Transcription (GO:0045893)	1/1274	0.369225	0.37402	0.427	0	0	2.4509	2.44196	IL17F
Regulation of Transcription by RNA Polymerase II (GO:0006357)	1950-01-01	0.566368	0.566368	0.247	0	0	1.31495	0.747567	IL17F

## Sheet: GO_MF
Term	Overlap	P-value	Adjusted P-value	#NAME?	Old P-value	Old Adjusted P-value	Odds Ratio	Combined Score	Genes
Cytokine Activity (GO:0005125)	3/186	2.7e-05	0.000162	3.79	0	0	81.1885	854.226	IL22;IL7;IL17F
Receptor Ligand Activity (GO:0048018)	3/380	0.000225	0.000675	3.17	0	0	39.0239	327.772	IL22;IL7;IL17F
Cytokine Receptor Activity (GO:0004896)	1983-01-01	0.0286949	0.0450447	1.35	0	0	40.4695	143.709	IL2RA
Growth Factor Activity (GO:0008083)	1992-01-01	0.0317635	0.0450447	1.35	0	0	36.4505	125.734	IL7
Cytokine Receptor Binding (GO:0005126)	1/109	0.0375372	0.0450447	1.35	0	0	30.6867	100.727	IL22
Protein Homodimerization Activity (GO:0042803)	1/680	0.215082	0.215082	0.667	0	0	4.7408	7.28534	IL17F

## Sheet: GO_CC
Term	Overlap	P-value	Adjusted P-value	#NAME?	Old P-value	Old Adjusted P-value	Odds Ratio	Combined Score	Genes
Collagen-Containing Extracellular Matrix (GO:0062023)	1/383	0.126608	0.126608	0.898	0	0	8.55628	17.683	IL7
