# Supplementary material for: Network-Level Organization of Systemic Inflammation Reflects Early Alzheimer’s-Like Behavioral Changes
Source: Research Square preprint supplement (doi:10.21203/rs.3.rs-7482654/v1), 2025-10-14
Supplement: Supplementary file 9 [file e2872aa763ae0c87c418ad74.xlsx]

## Sheet: KEGG
c	Overlap	P-value	Adjusted P-value	#NAME?	Old P-value	Old Adjusted P-value	Odds Ratio	Combined Score	Genes
Pathways in cancer	4/531	0.000398	0.0119352	1.92317	0	0	14.7696	115.638	IL3;NOTCH1;HGF;FLT3LG
Cytokine-cytokine receptor interaction	3/295	0.0010249	0.0153735	1.81323	0	0	18.3941	126.61	IL3;IL1RL2;TNFRSF12A
PI3K-Akt signaling pathway	3/354	0.00173123	0.0159247	1.79793	0	0	15.2564	97.0144	IL3;HGF;FLT3LG
Hematopoietic cell lineage	1999-02-01	0.0021233	0.0159247	1.79793	0	0	34.1735	210.331	IL3;FLT3LG
Ras signaling pathway	2/232	0.0111222	0.0667334	1.17566	0	0	14.3159	64.4047	HGF;FLT3LG
MAPK signaling pathway	2/294	0.0174411	0.0872053	1.05946	0	0	11.2409	45.5135	HGF;FLT3LG
Asthma	2025-01-31	0.0214895	0.0920978	1.03575	0	0	51.1692	196.5	IL3
Malaria	1950-01-01	0.0344477	0.0985057	1.00654	0	0	31.2983	105.422	HGF
Hedgehog signaling pathway	1956-01-01	0.0385066	0.0985057	1.00654	0	0	27.8755	90.7885	GAS1
Notch signaling pathway	1959-01-01	0.04053	0.0985057	1.00654	0	0	26.4297	84.726	NOTCH1
Acute myeloid leukemia	1967-01-01	0.0459067	0.0985057	1.00654	0	0	23.2168	71.5343	IL3
Fc epsilon RI signaling pathway	1968-01-01	0.0465768	0.0985057	1.00654	0	0	22.8691	70.1316	IL3
Renal cell carcinoma	1969-01-01	0.0472465	0.0985057	1.00654	0	0	22.5317	68.7752	HGF
Melanoma	1972-01-01	0.0492529	0.0985057	1.00654	0	0	21.5764	64.9619	HGF
Non-small cell lung cancer	1972-01-01	0.0492529	0.0985057	1.00654	0	0	21.5764	64.9619	HGF
Th1 and Th2 cell differentiation	1992-01-01	0.0625289	0.117242	0.930918	0	0	16.8174	46.62	NOTCH1
Thyroid hormone signaling pathway	1/121	0.0814736	0.143777	0.842311	0	0	12.7346	31.9317	NOTCH1
Apoptosis	1/142	0.0949696	0.149141	0.826404	0	0	10.8265	25.4878	IL3
Breast cancer	1/147	0.0981557	0.149141	0.826404	0	0	10.4531	24.2638	NOTCH1
Gastric cancer	1/149	0.0994272	0.149141	0.826404	0	0	10.3108	23.8007	HGF
JAK-STAT signaling pathway	1/162	0.107652	0.151942	0.818323	0	0	9.47205	21.1118	IL3
Hepatocellular carcinoma	1/168	0.111424	0.151942	0.818323	0	0	9.12897	20.0327	HGF
Transcriptional misregulation in cancer	1/192	0.126365	0.158559	0.799808	0	0	7.97221	16.4911	IL3
Focal adhesion	1/201	0.131908	0.158559	0.799808	0	0	7.61	15.4152	HGF
Proteoglycans in cancer	1/205	0.134361	0.158559	0.799808	0	0	7.45928	14.9725	HGF
Rap1 signaling pathway	1/210	0.137418	0.158559	0.799808	0	0	7.27898	14.4468	HGF
Calcium signaling pathway	1/240	0.155551	0.172834	0.76237	0	0	6.35565	11.8265	HGF
Prion disease	1/273	0.175088	0.187594	0.72678	0	0	5.57523	9.71464	NOTCH1
MicroRNAs in cancer	1/310	0.196494	0.20327	0.691928	0	0	4.89843	7.97036	NOTCH1
Human papillomavirus infection	1/331	0.208412	0.208412	0.681076	0	0	4.58182	7.18537	NOTCH1

## Sheet: Reactome
Term	Overlap	P-value	Adjusted P-value	#NAME?	Old P-value	Old Adjusted P-value	Odds Ratio	Combined Score	Genes
Cytokine Signaling in Immune System	5/776	0.00013	0.0142701	1.84557	0	0	13.8457	123.92	IL3;IL1RL2;TNFRSF12A;HGF;FLT3LG
RAF MAP Kinase Cascade	3/265	0.000751	0.0215177	1.6672	0	0	20.5316	147.697	IL3;HGF;FLT3LG
MAPK1 MAPK3 Signaling	3/271	0.000802	0.0215177	1.6672	0	0	20.0658	143.043	IL3;HGF;FLT3LG
MAPK Family Signaling Cascades	3/314	0.00122704	0.0215177	1.6672	0	0	17.2537	115.654	IL3;HGF;FLT3LG
Constitutive Signaling by Aberrant PI3K in Cancer	1983-02-01	0.00149906	0.0215177	1.6672	0	0	40.9568	266.339	HGF;FLT3LG
PI3K AKT Signaling in Cancer	2/110	0.00261253	0.0215177	1.6672	0	0	30.6759	182.443	HGF;FLT3LG
PI5P, PP2A and IER3 Regulate PI3K AKT Signaling	2/111	0.0026594	0.0215177	1.6672	0	0	30.393	180.22	HGF;FLT3LG
Negative Regulation of the PI3K AKT Network	2/118	0.00299862	0.0215177	1.6672	0	0	28.5489	165.857	HGF;FLT3LG
Diseases of Signal Transduction by Growth Factor Receptors and Second Messengers	3/451	0.00344514	0.0215177	1.6672	0	0	11.8941	67.4488	NOTCH1;HGF;FLT3LG
Signaling by Interleukins	3/452	0.00346672	0.0215177	1.6672	0	0	11.867	67.221	IL3;IL1RL2;HGF
FBXW7 Mutants and NOTCH1 in Cancer	2025-01-05	0.0034954	0.0215177	1.6672	0	0	384.269	2173.55	NOTCH1
RUNX1 Regulates Transcription of Genes Involved in Interleukin Signaling	2025-01-05	0.0034954	0.0215177	1.6672	0	0	384.269	2173.55	IL3
Defective LFNG Causes SCDO3	2025-01-05	0.0034954	0.0215177	1.6672	0	0	384.269	2173.55	NOTCH1
Loss of Function of FBXW7 in Cancer and NOTCH1 Signaling	2025-01-05	0.0034954	0.0215177	1.6672	0	0	384.269	2173.55	NOTCH1
MET Activates PTPN11	2025-01-05	0.0034954	0.0215177	1.6672	0	0	384.269	2173.55	HGF
MET Interacts With TNS Proteins	2025-01-05	0.0034954	0.0215177	1.6672	0	0	384.269	2173.55	HGF
Pre-NOTCH Processing in the Endoplasmic Reticulum	2025-01-06	0.00419312	0.0215177	1.6672	0	0	307.4	1682.8	NOTCH1
FLT3 Signaling Through SRC Family Kinases	2025-01-06	0.00419312	0.0215177	1.6672	0	0	307.4	1682.8	FLT3LG
MET Receptor Activation	2025-01-06	0.00419312	0.0215177	1.6672	0	0	307.4	1682.8	HGF
MET Activates PI3K AKT Signaling	2025-01-06	0.00419312	0.0215177	1.6672	0	0	307.4	1682.8	HGF
FLT3 Signaling by CBL Mutants	2025-01-07	0.00489039	0.0215177	1.6672	0	0	256.154	1362.86	FLT3LG
Constitutive Signaling by NOTCH1 t(7;9)(NOTCH1 M1580 K2555) Translocation Mutant	2025-01-07	0.00489039	0.0215177	1.6672	0	0	256.154	1362.86	NOTCH1
STAT5 Activation	2025-01-07	0.00489039	0.0215177	1.6672	0	0	256.154	1362.86	FLT3LG
Interleukin-36 Pathway	2025-01-07	0.00489039	0.0215177	1.6672	0	0	256.154	1362.86	IL1RL2
Signaling by NOTCH1 t(7;9)(NOTCH1 M1580 K2555) Translocation Mutant	2025-01-07	0.00489039	0.0215177	1.6672	0	0	256.154	1362.86	NOTCH1
Ligand-receptor Interactions	2025-01-08	0.0055872	0.0227627	1.64278	0	0	219.549	1138.86	GAS1
Regulation of NFE2L2 Gene Expression	2025-01-08	0.0055872	0.0227627	1.64278	0	0	219.549	1138.86	NOTCH1
MET Receptor Recycling	2025-01-10	0.00697947	0.0272336	1.56489	0	0	170.744	847.705	HGF
NFE2L2 Regulating Tumorigenic Genes	2025-01-11	0.00767493	0.0272336	1.56489	0	0	153.662	748.3	NOTCH1
MET Activates RAP1 and RAC1	2025-01-11	0.00767493	0.0272336	1.56489	0	0	153.662	748.3	HGF
MET Activates RAS Signaling	2025-01-11	0.00767493	0.0272336	1.56489	0	0	153.662	748.3	HGF
RUNX3 Regulates NOTCH Signaling	2025-01-14	0.00975859	0.0328499	1.48347	0	0	118.183	547.143	NOTCH1
Constitutive Signaling by NOTCH1 HD Domain Mutants	2025-01-15	0.0104522	0.0328499	1.48347	0	0	109.736	500.5	NOTCH1
Negative Regulation of FLT3	2025-01-15	0.0104522	0.0328499	1.48347	0	0	109.736	500.5	FLT3LG
Signaling by NOTCH1 HD Domain Mutants in Cancer	2025-01-15	0.0104522	0.0328499	1.48347	0	0	109.736	500.5	NOTCH1
Regulation of Gene Expression in Late Stage (Branching Morphogenesis) Pancreatic Bud Precursor Cells	2025-01-16	0.0111454	0.0336184	1.47342	0	0	102.415	460.534	NOTCH1
TNF Receptor Superfamily (TNFSF) Members Mediating Non-Canonical NF-kB Pathway	2025-01-17	0.0118382	0.0336184	1.47342	0	0	96.0096	425.939	TNFRSF12A
Immune System	1950-05-01	0.0124478	0.0336184	1.47342	0	0	4.62082	20.2679	IL3;IL1RL2;TNFRSF12A;HGF;FLT3LG
Pre-NOTCH Processing in Golgi	2025-01-18	0.0125305	0.0336184	1.47342	0	0	90.3575	395.729	NOTCH1
Activation of SMO	2025-01-18	0.0125305	0.0336184	1.47342	0	0	90.3575	395.729	GAS1
MECP2 Regulates Neuronal Receptors and Channels	2025-01-18	0.0125305	0.0336184	1.47342	0	0	90.3575	395.729	NOTCH1
NOTCH4 Intracellular Domain Regulates Transcription	2025-01-20	0.0139137	0.0364407	1.43841	0	0	80.8381	345.573	NOTCH1
Negative Regulation of MET Activity	2025-01-21	0.0146047	0.0373608	1.42758	0	0	76.7923	324.556	HGF
PIP3 Activates AKT Signaling	2/281	0.016013	0.0400325	1.39759	0	0	11.7724	48.6713	HGF;FLT3LG
NOTCH3 Intracellular Domain Regulates Transcription	2025-01-25	0.017364	0.0415226	1.38172	0	0	63.9808	259.337	NOTCH1
Interleukin-7 Signaling	2025-01-25	0.017364	0.0415226	1.38172	0	0	63.9808	259.337	HGF
Interleukin Receptor SHC Signaling	2025-01-27	0.0187409	0.0436155	1.36036	0	0	59.0533	234.857	IL3
FLT3 Signaling in Disease	2025-01-28	0.0194287	0.0436155	1.36036	0	0	56.8632	224.098	FLT3LG
Notch-HLH Transcription Pathway	2025-01-28	0.0194287	0.0436155	1.36036	0	0	56.8632	224.098	NOTCH1
Intracellular Signaling by Second Messengers	2/321	0.0205751	0.0448692	1.34805	0	0	10.2753	39.9061	HGF;FLT3LG
MET Activates PTK2 Signaling	2025-01-30	0.020803	0.0448692	1.34805	0	0	52.9363	205.004	HGF
Activated NOTCH1 Transmits Signal to the Nucleus	2025-01-31	0.0214895	0.0454585	1.34238	0	0	51.1692	196.5	NOTCH1
Nuclear Events Stimulated by ALK Signaling in Cancer	1935-01-01	0.0242309	0.0502905	1.29851	0	0	45.1403	167.928	NOTCH1
FLT3 Signaling	1938-01-01	0.0262822	0.0535379	1.27134	0	0	41.474	150.918	FLT3LG
Signal Transduction	2025-05-13	0.0273991	0.0547982	1.26123	0	0	3.70186	13.3165	IL3;NOTCH1;HGF;FLT3LG;GAS1
MET Promotes Cell Motility	1941-01-01	0.0283296	0.0556474	1.25455	0	0	38.3577	136.701	HGF
Regulation of Beta-Cell Development	1942-01-01	0.0290112	0.0559864	1.25192	0	0	37.4203	132.471	NOTCH1
Interleukin-2 Family Signaling	1944-01-01	0.030373	0.0566275	1.24697	0	0	35.6762	124.66	IL3
PI3K Cascade	1944-01-01	0.030373	0.0566275	1.24697	0	0	35.6762	124.66	FLT3LG
Somitogenesis	1945-01-01	0.0310532	0.0569308	1.24465	0	0	34.8636	121.048	NOTCH1
IRS-mediated Signalling	1948-01-01	0.0330912	0.0577783	1.23823	0	0	32.6334	111.23	FLT3LG
NOTCH1 Intracellular Domain Regulates Transcription	1948-01-01	0.0330912	0.0577783	1.23823	0	0	32.6334	111.23	NOTCH1
Interleukin-3, Interleukin-5 and GM-CSF Signaling	1948-01-01	0.0330912	0.0577783	1.23823	0	0	32.6334	111.23	IL3
Signaling by NOTCH3	1949-01-01	0.0337697	0.0580417	1.23626	0	0	31.9519	108.259	NOTCH1
IRS-related Events Triggered by IGF1R	1952-01-01	0.0358024	0.060057	1.22144	0	0	30.0679	100.118	FLT3LG
IGF1R Signaling Cascade	1953-01-01	0.0364791	0.060057	1.22144	0	0	29.4882	97.6358	FLT3LG
Insulin Receptor Signalling Cascade	1954-01-01	0.0371554	0.060057	1.22144	0	0	28.9303	95.2574	FLT3LG
Signaling by Type 1 Insulin-like Growth Factor 1 Receptor (IGF1R)	1954-01-01	0.0371554	0.060057	1.22144	0	0	28.9303	95.2574	FLT3LG
Constitutive Signaling by NOTCH1 HD+PEST Domain Mutants	1958-01-01	0.039856	0.060057	1.22144	0	0	26.8947	86.6678	NOTCH1
Constitutive Signaling by NOTCH1 PEST Domain Mutants	1958-01-01	0.039856	0.060057	1.22144	0	0	26.8947	86.6678	NOTCH1
Signaling by NOTCH1 HD+PEST Domain Mutants in Cancer	1958-01-01	0.039856	0.060057	1.22144	0	0	26.8947	86.6678	NOTCH1
Signaling by NOTCH1 PEST Domain Mutants in Cancer	1958-01-01	0.039856	0.060057	1.22144	0	0	26.8947	86.6678	NOTCH1
Signaling by NOTCH1 in Cancer	1958-01-01	0.039856	0.060057	1.22144	0	0	26.8947	86.6678	NOTCH1
Formation of Paraxial Mesoderm	1959-01-01	0.04053	0.0602474	1.22006	0	0	26.4297	84.726	NOTCH1
Transcriptional Regulation by MECP2	1963-01-01	0.0432219	0.0633921	1.19797	0	0	24.7196	77.6544	NOTCH1
Diseases Associated With O-glycosylation of Proteins	1971-01-01	0.0485845	0.0695099	1.15795	0	0	21.8857	66.1923	NOTCH1
Signaling by NOTCH4	1972-01-01	0.0492529	0.0695099	1.15795	0	0	21.5764	64.9619	NOTCH1
Pre-NOTCH Transcription and Translation	1973-01-01	0.0499208	0.0695099	1.15795	0	0	21.2756	63.7699	NOTCH1
Hedgehog 'On' State	1973-01-01	0.0499208	0.0695099	1.15795	0	0	21.2756	63.7699	GAS1
Signaling by NOTCH1	1974-01-01	0.0505883	0.0695589	1.15765	0	0	20.9831	62.6144	NOTCH1
Signaling by Receptor Tyrosine Kinases	2/536	0.0527328	0.0716124	1.14501	0	0	6.07116	17.8645	HGF;FLT3LG
Signaling by MET	1979-01-01	0.0539192	0.0723306	1.14068	0	0	19.6331	57.334	HGF
Signaling by Insulin Receptor	1982-01-01	0.0559125	0.074101	1.13018	0	0	18.9031	54.516	FLT3LG
Transcriptional Regulation by RUNX3	1986-01-01	0.0585643	0.0765556	1.11602	0	0	18.01	51.1056	NOTCH1
Nuclear Events Mediated by NFE2L2	1987-01-01	0.0592261	0.0765556	1.11602	0	0	17.7996	50.3088	NOTCH1
TNFR2 Non-Canonical NF-kB Pathway	1988-01-01	0.0598875	0.0765556	1.11602	0	0	17.5942	49.5326	TNFRSF12A
Pre-NOTCH Expression and Processing	1989-01-01	0.0605485	0.0765556	1.11602	0	0	17.3934	48.7764	NOTCH1
Signaling by ALK Fusions and Activated Point Mutants	1993-01-01	0.0631881	0.0780977	1.10736	0	0	16.6338	45.9365	NOTCH1
Signaling by ALK in Cancer	1993-01-01	0.0631881	0.0780977	1.10736	0	0	16.6338	45.9365	NOTCH1
Interleukin-4 and Interleukin-13 Signaling	1/112	0.0756326	0.0924398	1.03414	0	0	13.7734	35.5611	HGF
KEAP1-NFE2L2 Pathway	1/119	0.0801786	0.0966401	1.01484	0	0	12.9518	32.6838	NOTCH1
Gastrulation	1/120	0.0808263	0.0966401	1.01484	0	0	12.8423	32.3041	NOTCH1
Platelet Degranulation	1/128	0.0859929	0.101712	0.992628	0	0	12.0285	29.5117	HGF
Response to Elevated Platelet Cytosolic Ca2+	1/133	0.0892083	0.104393	0.98133	0	0	11.5699	27.962	HGF
Signaling by Hedgehog	1/136	0.0911325	0.105522	0.976658	0	0	11.3111	27.0951	GAS1
Interleukin-1 Family Signaling	1/140	0.0936923	0.107356	0.969175	0	0	10.9834	26.0058	IL1RL2
Diseases of Glycosylation	1/146	0.0975193	0.110589	0.956288	0	0	10.5257	24.5008	NOTCH1
Cellular Response to Chemical Stress	1/202	0.132522	0.147246	0.831955	0	0	7.57176	15.3026	NOTCH1
Transcriptional Regulation by RUNX1	1/202	0.132522	0.147246	0.831955	0	0	7.57176	15.3026	IL3
Signaling by NOTCH	1/209	0.136807	0.150488	0.822498	0	0	7.31435	14.5496	NOTCH1
Platelet Activation, Signaling and Aggregation	1/262	0.168623	0.18312	0.737265	0	0	5.81344	10.3484	HGF
Diseases of Metabolism	1/264	0.169802	0.18312	0.737265	0	0	5.76865	10.2285	NOTCH1
Disease	2025-03-31	0.181297	0.193618	0.713054	0	0	2.2887	3.90824	NOTCH1;HGF;FLT3LG
Generic Transcription Pathway	2/1230	0.211481	0.223682	0.650369	0	0	2.54587	3.95532	IL3;NOTCH1
RNA Polymerase II Transcription	2/1360	0.245782	0.257486	0.589247	0	0	2.28621	3.20826	IL3;NOTCH1
Gene Expression (Transcription)	2/1615	0.313984	0.325832	0.487006	0	0	1.89843	2.19917	IL3;NOTCH1
Hemostasis	1/707	0.395906	0.407006	0.390399	0	0	2.10068	1.94644	HGF
Cellular Responses to Stress	1/787	0.430056	0.43802	0.358506	0	0	1.87904	1.58561	NOTCH1
Cellular Responses to Stimuli	1/887	0.470223	0.474537	0.32373	0	0	1.65827	1.25125	NOTCH1
Developmental Biology	1/1385	0.63397	0.63397	0.197931	0	0	1.0339	0.471205	NOTCH1

## Sheet: GO_BP
Term	Overlap	P-value	Adjusted P-value	#NAME?	Old P-value	Old Adjusted P-value	Odds Ratio	Combined Score	Genes
Embryonic Hemopoiesis (GO:0035162)	2025-02-13	3.53e-05	0.00720816	2.14218	0	0	302.652	3102.38	IL3;FLT3LG
Cellular Response to Vascular Endothelial Growth Factor Stimulus (GO:0035924)	1936-02-01	0.000283	0.0288438	1.53995	0	0	97.8039	799.139	NOTCH1;GAS1
Embryonic Organ Development (GO:0048568)	1973-02-01	0.0011623	0.0335232	1.47465	0	0	46.7488	315.899	IL3;FLT3LG
Hemopoiesis (GO:0030097)	2/101	0.00220864	0.0335232	1.47465	0	0	33.4798	204.742	IL3;FLT3LG
Negative Regulation of Glial Cell Proliferation (GO:0060253)	2025-01-05	0.0034954	0.0335232	1.47465	0	0	384.269	2173.55	NOTCH1
Pericardium Morphogenesis (GO:0003344)	2025-01-05	0.0034954	0.0335232	1.47465	0	0	384.269	2173.55	NOTCH1
Venous Blood Vessel Morphogenesis (GO:0048845)	2025-01-05	0.0034954	0.0335232	1.47465	0	0	384.269	2173.55	NOTCH1
Positive Regulation of Transcription of Notch Receptor Target (GO:0007221)	2025-01-05	0.0034954	0.0335232	1.47465	0	0	384.269	2173.55	NOTCH1
Regulation of pro-B Cell Differentiation (GO:2000973)	2025-01-05	0.0034954	0.0335232	1.47465	0	0	384.269	2173.55	NOTCH1
Cardiac Muscle Cell Myoblast Differentiation (GO:0060379)	2025-01-06	0.00419312	0.0335232	1.47465	0	0	307.4	1682.8	NOTCH1
Vascular Associated Smooth Muscle Cell Development (GO:0097084)	2025-01-06	0.00419312	0.0335232	1.47465	0	0	307.4	1682.8	NOTCH1
Cellular Response to Gonadotropin Stimulus (GO:0071371)	2025-01-06	0.00419312	0.0335232	1.47465	0	0	307.4	1682.8	NOTCH1
Negative Regulation of Oligodendrocyte Differentiation (GO:0048715)	2025-01-06	0.00419312	0.0335232	1.47465	0	0	307.4	1682.8	NOTCH1
Interleukin-3-Mediated Signaling Pathway (GO:0038156)	2025-01-06	0.00419312	0.0335232	1.47465	0	0	307.4	1682.8	IL3
Regulation of Cardiac Epithelial to Mesenchymal Transition (GO:0062042)	2025-01-06	0.00419312	0.0335232	1.47465	0	0	307.4	1682.8	NOTCH1
Atrioventricular Valve Formation (GO:0003190)	2025-01-06	0.00419312	0.0335232	1.47465	0	0	307.4	1682.8	NOTCH1
Regulation of Cell Adhesion Molecule Production (GO:0060353)	2025-01-06	0.00419312	0.0335232	1.47465	0	0	307.4	1682.8	NOTCH1
Positive Regulation of Cell Population Proliferation (GO:0008284)	3/484	0.0042021	0.0335232	1.47465	0	0	11.0593	60.5186	IL3;NOTCH1;FLT3LG
Cellular Response to Growth Factor Stimulus (GO:0071363)	2/150	0.00479271	0.0335232	1.47465	0	0	22.3401	119.311	NOTCH1;GAS1
Cardiac Atrium Development (GO:0003230)	2025-01-07	0.00489039	0.0335232	1.47465	0	0	256.154	1362.86	NOTCH1
Cell Migration Involved in Heart Development (GO:0060973)	2025-01-07	0.00489039	0.0335232	1.47465	0	0	256.154	1362.86	NOTCH1
Regulation of Extracellular Matrix Constituent Secretion (GO:0003330)	2025-01-07	0.00489039	0.0335232	1.47465	0	0	256.154	1362.86	NOTCH1
Pericardium Development (GO:0060039)	2025-01-07	0.00489039	0.0335232	1.47465	0	0	256.154	1362.86	NOTCH1
Negative Regulation of Muscle Hypertrophy (GO:0014741)	2025-01-07	0.00489039	0.0335232	1.47465	0	0	256.154	1362.86	NOTCH1
Positive Regulation of Astrocyte Differentiation (GO:0048711)	2025-01-07	0.00489039	0.0335232	1.47465	0	0	256.154	1362.86	NOTCH1
Coronary Vasculature Morphogenesis (GO:0060977)	2025-01-07	0.00489039	0.0335232	1.47465	0	0	256.154	1362.86	NOTCH1
Positive Regulation of Smooth Muscle Cell Differentiation (GO:0051152)	2025-01-07	0.00489039	0.0335232	1.47465	0	0	256.154	1362.86	NOTCH1
Positive Regulation of Cardiac Epithelial to Mesenchymal Transition (GO:0062043)	2025-01-07	0.00489039	0.0335232	1.47465	0	0	256.154	1362.86	NOTCH1
Regulation of Response to Wounding (GO:1903034)	2025-01-08	0.0055872	0.0335232	1.47465	0	0	219.549	1138.86	TNFRSF12A
Epithelial to Mesenchymal Transition Involved in Endocardial Cushion Formation (GO:0003198)	2025-01-08	0.0055872	0.0335232	1.47465	0	0	219.549	1138.86	NOTCH1
Cardioblast Differentiation (GO:0010002)	2025-01-08	0.0055872	0.0335232	1.47465	0	0	219.549	1138.86	NOTCH1
Negative Regulation of Glial Cell Differentiation (GO:0045686)	2025-01-08	0.0055872	0.0335232	1.47465	0	0	219.549	1138.86	NOTCH1
Regulation of Glial Cell Proliferation (GO:0060251)	2025-01-08	0.0055872	0.0335232	1.47465	0	0	219.549	1138.86	NOTCH1
Ventricular Trabecula Myocardium Morphogenesis (GO:0003222)	2025-01-08	0.0055872	0.0335232	1.47465	0	0	219.549	1138.86	NOTCH1
Morphogenesis of an Epithelial Sheet (GO:0002011)	2025-01-09	0.00628356	0.036508	1.43761	0	0	192.096	973.893	NOTCH1
Regulation of Extracellular Matrix Assembly (GO:1901201)	2025-01-10	0.00697947	0.036508	1.43761	0	0	170.744	847.705	NOTCH1
Mitral Valve Morphogenesis (GO:0003183)	2025-01-10	0.00697947	0.036508	1.43761	0	0	170.744	847.705	NOTCH1
Negative Regulation of Protein Maturation (GO:1903318)	2025-01-10	0.00697947	0.036508	1.43761	0	0	170.744	847.705	GAS1
Negative Regulation of Cell-Cell Adhesion Mediated by Cadherin (GO:2000048)	2025-01-10	0.00697947	0.036508	1.43761	0	0	170.744	847.705	NOTCH1
Negative Regulation of Extracellular Matrix Organization (GO:1903054)	2025-01-11	0.00767493	0.0369831	1.432	0	0	153.662	748.3	NOTCH1
Regulation of Smooth Muscle Cell Differentiation (GO:0051150)	2025-01-11	0.00767493	0.0369831	1.432	0	0	153.662	748.3	NOTCH1
Regulation of Astrocyte Differentiation (GO:0048710)	2025-01-12	0.00836994	0.0369831	1.432	0	0	139.685	668.13	NOTCH1
Negative Regulation of Chemotaxis (GO:0050922)	2025-01-12	0.00836994	0.0369831	1.432	0	0	139.685	668.13	NOTCH1
Positive Regulation of Cellular Process (GO:0048522)	3/622	0.00843374	0.0369831	1.432	0	0	8.53297	40.7493	IL3;NOTCH1;FLT3LG
Cardiac Cell Development (GO:0055006)	2025-01-13	0.00906449	0.0369831	1.432	0	0	128.038	602.215	NOTCH1
Cardiac Left Ventricle Morphogenesis (GO:0003214)	2025-01-13	0.00906449	0.0369831	1.432	0	0	128.038	602.215	NOTCH1
Positive Regulation of Ras Protein Signal Transduction (GO:0046579)	2025-01-13	0.00906449	0.0369831	1.432	0	0	128.038	602.215	NOTCH1
Negative Regulation of Stem Cell Differentiation (GO:2000737)	2025-01-13	0.00906449	0.0369831	1.432	0	0	128.038	602.215	NOTCH1
Atrioventricular Valve Development (GO:0003171)	2025-01-13	0.00906449	0.0369831	1.432	0	0	128.038	602.215	NOTCH1
Negative Regulation of Cardiac Muscle Hypertrophy (GO:0010614)	2025-01-13	0.00906449	0.0369831	1.432	0	0	128.038	602.215	NOTCH1
Positive Regulation of Cardiac Muscle Cell Proliferation (GO:0060045)	2025-01-14	0.00975859	0.0382837	1.41699	0	0	118.183	547.143	NOTCH1
Negative Regulation of Cell Migration Involved in Sprouting Angiogenesis (GO:0090051)	2025-01-14	0.00975859	0.0382837	1.41699	0	0	118.183	547.143	NOTCH1
Mesenchyme Morphogenesis (GO:0072132)	2025-01-16	0.0111454	0.0394964	1.40344	0	0	102.415	460.534	NOTCH1
Negative Regulation of Myoblast Differentiation (GO:0045662)	2025-01-16	0.0111454	0.0394964	1.40344	0	0	102.415	460.534	NOTCH1
Negative Regulation of Protein Processing (GO:0010955)	2025-01-16	0.0111454	0.0394964	1.40344	0	0	102.415	460.534	GAS1
Positive Regulation of Glial Cell Differentiation (GO:0045687)	2025-01-17	0.0118382	0.0394964	1.40344	0	0	96.0096	425.939	NOTCH1
Regulation of Endothelial Cell Chemotaxis (GO:2001026)	2025-01-17	0.0118382	0.0394964	1.40344	0	0	96.0096	425.939	NOTCH1
Muscle Tissue Morphogenesis (GO:0060415)	2025-01-17	0.0118382	0.0394964	1.40344	0	0	96.0096	425.939	NOTCH1
Positive Regulation of Cardiac Muscle Tissue Growth (GO:0055023)	2025-01-17	0.0118382	0.0394964	1.40344	0	0	96.0096	425.939	NOTCH1
Negative Regulation of Anoikis (GO:2000811)	2025-01-17	0.0118382	0.0394964	1.40344	0	0	96.0096	425.939	NOTCH1
Cardiac Atrium Morphogenesis (GO:0003209)	2025-01-18	0.0125305	0.0394964	1.40344	0	0	90.3575	395.729	NOTCH1
Positive Regulation of Muscle Cell Differentiation (GO:0051149)	2025-01-18	0.0125305	0.0394964	1.40344	0	0	90.3575	395.729	NOTCH1
Negative Regulation of Nervous System Development (GO:0051961)	2025-01-18	0.0125305	0.0394964	1.40344	0	0	90.3575	395.729	NOTCH1
Regulation of Oligodendrocyte Differentiation (GO:0048713)	2025-01-18	0.0125305	0.0394964	1.40344	0	0	90.3575	395.729	NOTCH1
Cardiac Epithelial to Mesenchymal Transition (GO:0060317)	2025-01-19	0.0132223	0.0394964	1.40344	0	0	85.3333	369.139	NOTCH1
Pulmonary Valve Morphogenesis (GO:0003184)	2025-01-19	0.0132223	0.0394964	1.40344	0	0	85.3333	369.139	NOTCH1
Cardiac Ventricle Development (GO:0003231)	2025-01-20	0.0139137	0.0394964	1.40344	0	0	80.8381	345.573	NOTCH1
Heart Trabecula Morphogenesis (GO:0061384)	2025-01-20	0.0139137	0.0394964	1.40344	0	0	80.8381	345.573	NOTCH1
Atrioventricular Valve Morphogenesis (GO:0003181)	2025-01-20	0.0139137	0.0394964	1.40344	0	0	80.8381	345.573	NOTCH1
Regulation of Cell-Cell Adhesion Mediated by Cadherin (GO:2000047)	2025-01-20	0.0139137	0.0394964	1.40344	0	0	80.8381	345.573	NOTCH1
Endocardial Cushion Morphogenesis (GO:0003203)	2025-01-20	0.0139137	0.0394964	1.40344	0	0	80.8381	345.573	NOTCH1
Pulmonary Valve Development (GO:0003177)	2025-01-21	0.0146047	0.0394964	1.40344	0	0	76.7923	324.556	NOTCH1
Myoblast Differentiation (GO:0045445)	2025-01-21	0.0146047	0.0394964	1.40344	0	0	76.7923	324.556	NOTCH1
Regulation of Cardiac Muscle Cell Proliferation (GO:0060043)	2025-01-21	0.0146047	0.0394964	1.40344	0	0	76.7923	324.556	NOTCH1
Negative Regulation of Biomineral Tissue Development (GO:0070168)	2025-01-21	0.0146047	0.0394964	1.40344	0	0	76.7923	324.556	NOTCH1
Regulation of Cell Population Proliferation (GO:0042127)	3/769	0.0150069	0.0394964	1.40344	0	0	6.8431	28.7359	IL3;NOTCH1;FLT3LG
Regulation of Anoikis (GO:2000209)	2025-01-22	0.0152952	0.0394964	1.40344	0	0	73.1319	305.707	NOTCH1
Negative Regulation of Cell Development (GO:0010721)	2025-01-22	0.0152952	0.0394964	1.40344	0	0	73.1319	305.707	NOTCH1
Endocardial Cushion Development (GO:0003197)	2025-01-22	0.0152952	0.0394964	1.40344	0	0	73.1319	305.707	NOTCH1
Positive Regulation of BMP Signaling Pathway (GO:0030513)	2025-01-23	0.0159852	0.0402591	1.39514	0	0	69.8042	288.716	NOTCH1
Dendritic Cell Differentiation (GO:0097028)	2025-01-23	0.0159852	0.0402591	1.39514	0	0	69.8042	288.716	FLT3LG
Regulation of Extracellular Matrix Organization (GO:1903053)	2025-01-24	0.0166748	0.041189	1.38522	0	0	66.7659	273.33	NOTCH1
Regulation of Biomineral Tissue Development (GO:0070167)	2025-01-25	0.017364	0.041189	1.38522	0	0	63.9808	259.337	NOTCH1
Regulation of Cardiac Muscle Hypertrophy (GO:0010611)	2025-01-25	0.017364	0.041189	1.38522	0	0	63.9808	259.337	NOTCH1
Negative Regulation of Catalytic Activity (GO:0043086)	2025-01-25	0.017364	0.041189	1.38522	0	0	63.9808	259.337	NOTCH1
Regulation of Protein Processing (GO:0070613)	2025-01-25	0.017364	0.041189	1.38522	0	0	63.9808	259.337	GAS1
Negative Regulation of Neurogenesis (GO:0050768)	2025-01-27	0.0187409	0.0439443	1.3571	0	0	59.0533	234.857	NOTCH1
Ventricular Septum Morphogenesis (GO:0060412)	2025-01-28	0.0194287	0.0450394	1.34641	0	0	56.8632	224.098	NOTCH1
Cardiac Muscle Tissue Morphogenesis (GO:0055008)	2025-01-30	0.020803	0.0466353	1.33128	0	0	52.9363	205.004	NOTCH1
Negative Regulation of Mitotic Cell Cycle (GO:0045930)	2025-01-30	0.020803	0.0466353	1.33128	0	0	52.9363	205.004	GAS1
Negative Regulation of Ossification (GO:0030279)	2025-01-30	0.020803	0.0466353	1.33128	0	0	52.9363	205.004	NOTCH1
Determination of Bilateral Symmetry (GO:0009855)	2025-01-31	0.0214895	0.0471382	1.32663	0	0	51.1692	196.5	NOTCH1
Artery Morphogenesis (GO:0048844)	2025-01-31	0.0214895	0.0471382	1.32663	0	0	51.1692	196.5	NOTCH1
Regulation of Cell Migration Involved in Sprouting Angiogenesis (GO:0090049)	1932-01-01	0.0221755	0.0481255	1.31762	0	0	49.5161	188.595	NOTCH1
Vasculogenesis (GO:0001570)	1933-01-01	0.0228611	0.0485798	1.31354	0	0	47.9663	181.232	NOTCH1
Ventricular Cardiac Muscle Tissue Morphogenesis (GO:0055010)	1933-01-01	0.0228611	0.0485798	1.31354	0	0	47.9663	181.232	NOTCH1
Regulation of Ras Protein Signal Transduction (GO:0046578)	1934-01-01	0.0235462	0.0490145	1.30968	0	0	46.5105	174.358	NOTCH1
Negative Regulation of Blood Vessel Endothelial Cell Migration (GO:0043537)	1934-01-01	0.0235462	0.0490145	1.30968	0	0	46.5105	174.358	NOTCH1
Negative Regulation of Osteoblast Differentiation (GO:0045668)	1935-01-01	0.0242309	0.0499303	1.30164	0	0	45.1403	167.928	NOTCH1
Left/Right Pattern Formation (GO:0060972)	1936-01-01	0.0249151	0.0505809	1.29601	0	0	43.8484	161.9	NOTCH1
Negative Regulation of Endothelial Cell Migration (GO:0010596)	1937-01-01	0.0255989	0.0505809	1.29601	0	0	42.6282	156.241	NOTCH1
Regulation of Cellular Component Biogenesis (GO:0044087)	1937-01-01	0.0255989	0.0505809	1.29601	0	0	42.6282	156.241	NOTCH1
Ventricular Septum Development (GO:0003281)	1938-01-01	0.0262822	0.0505809	1.29601	0	0	41.474	150.918	NOTCH1
Heart Looping (GO:0001947)	1938-01-01	0.0262822	0.0505809	1.29601	0	0	41.474	150.918	NOTCH1
Positive Regulation of Receptor Signaling Pathway via JAK-STAT (GO:0046427)	1938-01-01	0.0262822	0.0505809	1.29601	0	0	41.474	150.918	NOTCH1
Aortic Valve Morphogenesis (GO:0003180)	1938-01-01	0.0262822	0.0505809	1.29601	0	0	41.474	150.918	NOTCH1
Negative Regulation of Cell-Substrate Adhesion (GO:0010812)	1939-01-01	0.0269651	0.0505836	1.29599	0	0	40.3806	145.903	NOTCH1
Positive Regulation of Extrinsic Apoptotic Signaling Pathway (GO:2001238)	1939-01-01	0.0269651	0.0505836	1.29599	0	0	40.3806	145.903	TNFRSF12A
Negative Regulation of Proteolysis (GO:0045861)	1940-01-01	0.0276476	0.0505836	1.29599	0	0	39.3432	141.172	GAS1
Negative Regulation of Cell-Cell Adhesion (GO:0022408)	1940-01-01	0.0276476	0.0505836	1.29599	0	0	39.3432	141.172	NOTCH1
Negative Regulation of Secretion by Cell (GO:1903531)	1941-01-01	0.0283296	0.0505836	1.29599	0	0	38.3577	136.701	NOTCH1
Aortic Valve Development (GO:0003176)	1941-01-01	0.0283296	0.0505836	1.29599	0	0	38.3577	136.701	NOTCH1
Cardiac Ventricle Morphogenesis (GO:0003208)	1942-01-01	0.0290112	0.0505836	1.29599	0	0	37.4203	132.471	NOTCH1
Notch Signaling Pathway (GO:0007219)	1942-01-01	0.0290112	0.0505836	1.29599	0	0	37.4203	132.471	NOTCH1
Positive Regulation of Receptor Signaling Pathway via STAT (GO:1904894)	1942-01-01	0.0290112	0.0505836	1.29599	0	0	37.4203	132.471	NOTCH1
Determination of Heart Left/Right Asymmetry (GO:0061371)	1942-01-01	0.0290112	0.0505836	1.29599	0	0	37.4203	132.471	NOTCH1
Embryonic Heart Tube Morphogenesis (GO:0003143)	1942-01-01	0.0290112	0.0505836	1.29599	0	0	37.4203	132.471	NOTCH1
Regulation of Peptidyl-Tyrosine Phosphorylation (GO:0050730)	1943-01-01	0.0296923	0.0513324	1.28961	0	0	36.5275	128.462	IL3
Regulation of Ossification (GO:0030278)	1944-01-01	0.030373	0.0520679	1.28343	0	0	35.6762	124.66	NOTCH1
Negative Regulation of BMP Signaling Pathway (GO:0030514)	1945-01-01	0.0310532	0.0527904	1.27744	0	0	34.8636	121.048	NOTCH1
Mononuclear Cell Differentiation (GO:1903131)	1946-01-01	0.031733	0.0530617	1.27522	0	0	34.0872	117.614	FLT3LG
Regulation of Cell-Substrate Adhesion (GO:0010810)	1946-01-01	0.031733	0.0530617	1.27522	0	0	34.0872	117.614	NOTCH1
Negative Regulation of Cold-Induced Thermogenesis (GO:0120163)	1947-01-01	0.0324123	0.0533235	1.27308	0	0	33.3445	114.345	NOTCH1
Cellular Defense Response (GO:0006968)	1947-01-01	0.0324123	0.0533235	1.27308	0	0	33.3445	114.345	IL1RL2
Regulation of Stem Cell Differentiation (GO:2000736)	1949-01-01	0.0337697	0.0542442	1.26565	0	0	31.9519	108.259	NOTCH1
Regulation of Wound Healing (GO:0061041)	1949-01-01	0.0337697	0.0542442	1.26565	0	0	31.9519	108.259	TNFRSF12A
Positive Regulation of Epithelial to Mesenchymal Transition (GO:0010718)	1949-01-01	0.0337697	0.0542442	1.26565	0	0	31.9519	108.259	NOTCH1
Epithelial to Mesenchymal Transition (GO:0001837)	1951-01-01	0.0351253	0.0551197	1.25869	0	0	30.6708	102.711	NOTCH1
Cardiac Muscle Tissue Development (GO:0048738)	1951-01-01	0.0351253	0.0551197	1.25869	0	0	30.6708	102.711	NOTCH1
Regulation of Intracellular Transport (GO:0032386)	1951-01-01	0.0351253	0.0551197	1.25869	0	0	30.6708	102.711	GAS1
Determination of Left/Right Symmetry (GO:0007368)	1952-01-01	0.0358024	0.0555354	1.25543	0	0	30.0679	100.118	NOTCH1
B Cell Differentiation (GO:0030183)	1953-01-01	0.0364791	0.0555354	1.25543	0	0	29.4882	97.6358	FLT3LG
Regulation of Smoothened Signaling Pathway (GO:0008589)	1953-01-01	0.0364791	0.0555354	1.25543	0	0	29.4882	97.6358	GAS1
Positive Regulation of Small GTPase Mediated Signal Transduction (GO:0051057)	1953-01-01	0.0364791	0.0555354	1.25543	0	0	29.4882	97.6358	NOTCH1
Regulation of Receptor Signaling Pathway via JAK-STAT (GO:0046425)	1955-01-01	0.0378312	0.0567468	1.24606	0	0	28.3932	92.9769	NOTCH1
Cell Surface Receptor Signaling Pathway via STAT (GO:0097696)	1955-01-01	0.0378312	0.0567468	1.24606	0	0	28.3932	92.9769	IL3
Heart Morphogenesis (GO:0003007)	1957-01-01	0.0391815	0.0583433	1.23401	0	0	27.3764	88.6871	NOTCH1
Mesenchymal Cell Differentiation (GO:0048762)	1958-01-01	0.039856	0.0584937	1.23289	0	0	26.8947	86.6678	NOTCH1
Regulation of Myoblast Differentiation (GO:0045661)	1958-01-01	0.039856	0.0584937	1.23289	0	0	26.8947	86.6678	NOTCH1
Negative Regulation of Metabolic Process (GO:0009892)	1963-01-01	0.0432219	0.0625338	1.20389	0	0	24.7196	77.6544	NOTCH1
Positive Regulation of Peptidyl-Tyrosine Phosphorylation (GO:0050731)	1963-01-01	0.0432219	0.0625338	1.20389	0	0	24.7196	77.6544	IL3
Regulation of Extrinsic Apoptotic Signaling Pathway (GO:2001236)	1965-01-01	0.0445652	0.0640232	1.19366	0	0	23.9447	74.4873	TNFRSF12A
Regulation of Neurogenesis (GO:0050767)	1966-01-01	0.0452361	0.0645327	1.19022	0	0	23.5751	72.9853	NOTCH1
Negative Regulation of Cell Adhesion (GO:0007162)	1967-01-01	0.0459067	0.0650345	1.18686	0	0	23.2168	71.5343	NOTCH1
Positive Regulation of Apoptotic Signaling Pathway (GO:2001235)	1970-01-01	0.0479157	0.0674124	1.17126	0	0	22.204	67.4627	TNFRSF12A
Negative Regulation of Cellular Response to Growth Factor Stimulus (GO:0090288)	1973-01-01	0.0499208	0.0697523	1.15644	0	0	21.2756	63.7699	NOTCH1
Lymphocyte Differentiation (GO:0030098)	1976-01-01	0.0519219	0.0719999	1.14267	0	0	20.4215	60.4072	FLT3LG
Cellular Response to Hypoxia (GO:0071456)	1977-01-01	0.0525881	0.0719999	1.14267	0	0	20.1518	59.3525	NOTCH1
Regulation of BMP Signaling Pathway (GO:0030510)	1977-01-01	0.0525881	0.0719999	1.14267	0	0	20.1518	59.3525	NOTCH1
Cellular Response to Decreased Oxygen Levels (GO:0036294)	1978-01-01	0.0532539	0.0724253	1.14011	0	0	19.8891	58.3285	NOTCH1
Negative Regulation of Cell Cycle (GO:0045786)	1981-01-01	0.0552485	0.0746404	1.12703	0	0	19.1404	55.4289	GAS1
Regulation of Vesicle-Mediated Transport (GO:0060627)	1982-01-01	0.0559125	0.0750405	1.1247	0	0	18.9031	54.516	GAS1
+ Reg of Transmembrane Receptor Prot Serine/Threonine Kinase Sgnlng Pway (GO:0090100)	1984-01-01	0.0572393	0.076319	1.11737	0	0	18.4458	52.7644	NOTCH1
Regulation of Osteoblast Differentiation (GO:0045667)	1992-01-01	0.0625289	0.0828305	1.08181	0	0	16.8174	46.62	NOTCH1
B Cell Activation (GO:0042113)	1996-01-01	0.0651633	0.0857634	1.0667	0	0	16.1061	43.9834	FLT3LG
Regulation of Defense Response (GO:0031347)	1/103	0.0697571	0.0912208	1.03991	0	0	14.9955	39.929	IL1RL2
Negative Regulation of Developmental Process (GO:0051093)	1/111	0.0749815	0.0974282	1.01132	0	0	13.8993	36.0063	NOTCH1
- Reg of Transmembrane Receptor Prot Serine/Threonine Kinase Sgnlng Pway (GO:0090101)	1/122	0.0821205	0.106029	0.974575	0	0	12.6287	31.5664	NOTCH1
Regulation of Mitotic Cell Cycle (GO:0007346)	1/124	0.083413	0.10702	0.970533	0	0	12.4221	30.856	GAS1
Regulation of Apoptotic Process (GO:0042981)	2/704	0.0851493	0.108565	0.964309	0	0	4.57835	11.2781	TNFRSF12A;GAS1
Regulation of Response to External Stimulus (GO:0032101)	1/132	0.0885661	0.110843	0.95529	0	0	11.6588	28.2611	IL1RL2
Circulatory System Development (GO:0072359)	1/132	0.0885661	0.110843	0.95529	0	0	11.6588	28.2611	NOTCH1
Neuron Projection Guidance (GO:0097485)	1/132	0.0885661	0.110843	0.95529	0	0	11.6588	28.2611	NOTCH1
Regulation of Cold-Induced Thermogenesis (GO:0120161)	1/148	0.0987916	0.122887	0.910493	0	0	10.3815	24.0304	NOTCH1
Axon Guidance (GO:0007411)	1/152	0.101331	0.125282	0.90211	0	0	10.1044	23.1327	NOTCH1
Positive Regulation of ERK1 and ERK2 Cascade (GO:0070374)	1/153	0.101965	0.125307	0.902026	0	0	10.0374	22.9167	NOTCH1
Heart Development (GO:0007507)	1/171	0.113304	0.137584	0.861432	0	0	8.96652	19.5262	NOTCH1
Positive Regulation of Protein Phosphorylation (GO:0001934)	1/171	0.113304	0.137584	0.861432	0	0	8.96652	19.5262	IL3
Regulation of Programmed Cell Death (GO:0043067)	1/195	0.128217	0.15477	0.810312	0	0	7.84774	16.1195	GAS1
Axonogenesis (GO:0007409)	1/200	0.131294	0.157553	0.802575	0	0	7.64863	15.5291	NOTCH1
Negative Regulation of Macromolecule Biosynthetic Process (GO:0010558)	1/202	0.132522	0.158096	0.801078	0	0	7.57176	15.3026	NOTCH1
Regulation of Signal Transduction (GO:0009966)	1/211	0.138028	0.163708	0.78593	0	0	7.24396	14.3452	GAS1
Negative Regulation of Cell Differentiation (GO:0045596)	1/220	0.143502	0.169216	0.771558	0	0	6.9431	13.4794	NOTCH1
Regulation of ERK1 and ERK2 Cascade (GO:0070372)	1/223	0.14532	0.170375	0.768595	0	0	6.84823	13.209	NOTCH1
Cilium Organization (GO:0044782)	1/230	0.149546	0.174328	0.758632	0	0	6.63655	12.6104	NOTCH1
Negative Regulation of Multicellular Organismal Process (GO:0051241)	1/243	0.157345	0.182377	0.73903	0	0	6.27591	11.6061	NOTCH1
Cilium Assembly (GO:0060271)	1/247	0.159731	0.182378	0.739028	0	0	6.17261	11.3222	NOTCH1
Positive Regulation of Programmed Cell Death (GO:0043068)	1/248	0.160326	0.182378	0.739028	0	0	6.14731	11.2529	TNFRSF12A
Regulation of Inflammatory Response (GO:0050727)	1/249	0.160922	0.182378	0.739028	0	0	6.12221	11.1843	IL1RL2
Positive Regulation of Cell Motility (GO:2000147)	1/249	0.160922	0.182378	0.739028	0	0	6.12221	11.1843	NOTCH1
Cytokine-Mediated Signaling Pathway (GO:0019221)	1/255	0.164484	0.185386	0.731924	0	0	5.97577	10.7859	IL3
Plasma Membrane Bounded Cell Projection Assembly (GO:0120031)	1/277	0.177428	0.198875	0.70142	0	0	5.49331	9.49899	NOTCH1
Positive Regulation of Apoptotic Process (GO:0043065)	1/313	0.198207	0.220952	0.655703	0	0	4.85059	7.85042	TNFRSF12A
Positive Regulation of Cell Migration (GO:0030335)	1/344	0.215708	0.239093	0.621432	0	0	4.40525	6.7569	NOTCH1
Organelle Assembly (GO:0070925)	1/346	0.216825	0.239093	0.621432	0	0	4.37926	6.69443	NOTCH1
Positive Regulation of Macromolecule Biosynthetic Process (GO:0010557)	1/355	0.221833	0.2433	0.613857	0	0	4.26597	6.42384	NOTCH1
Positive Regulation of MAPK Cascade (GO:0043410)	1/362	0.225707	0.246113	0.608865	0	0	4.18176	6.22463	NOTCH1
Negative Regulation of Gene Expression (GO:0010629)	1/364	0.22681	0.246113	0.608865	0	0	4.1583	6.16942	NOTCH1
Negative Regulation of Cell Population Proliferation (GO:0008285)	1/379	0.235041	0.253695	0.595688	0	0	3.99023	5.77783	NOTCH1
Positive Regulation of Gene Expression (GO:0010628)	1/436	0.265582	0.285151	0.544925	0	0	3.45729	4.58379	NOTCH1
Regulation of RNA Biosynthetic Process (GO:2001141)	1/465	0.280682	0.299786	0.523189	0	0	3.23641	4.11196	NOTCH1
Negative Regulation of RNA Biosynthetic Process (GO:1902679)	1/470	0.283256	0.300959	0.521492	0	0	3.20108	4.03786	NOTCH1
Negative Regulation of Apoptotic Process (GO:0043066)	1/475	0.285821	0.301688	0.520442	0	0	3.1665	3.96569	NOTCH1
Regulation of Cell Migration (GO:0030334)	1/479	0.287868	0.301688	0.520442	0	0	3.13936	3.90931	NOTCH1
Nervous System Development (GO:0007399)	1/480	0.288378	0.301688	0.520442	0	0	3.13265	3.89539	IL3
Negative Regulation of Cellular Process (GO:0048523)	1/531	0.313979	0.326794	0.485725	0	0	2.8238	3.27118	NOTCH1
Positive Regulation of RNA Biosynthetic Process (GO:1902680)	1/555	0.325728	0.337302	0.471981	0	0	2.69814	3.02648	NOTCH1
Negative Regulation of Transcription by RNA Polymerase II (GO:0000122)	1/732	0.406777	0.419103	0.377679	0	0	2.0262	1.82255	NOTCH1
Positive Regulation of Transcription by RNA Polymerase II (GO:0045944)	1/983	0.506296	0.519017	0.284818	0	0	1.48864	1.01322	NOTCH1
Negative Regulation of DNA-templated Transcription (GO:0045892)	1/1006	0.514593	0.524885	0.279936	0	0	1.45281	0.965218	NOTCH1
Regulation of Gene Expression (GO:0010468)	1/1127	0.55615	0.564451	0.248374	0	0	1.28843	0.755942	NOTCH1
Positive Regulation of DNA-templated Transcription (GO:0045893)	1/1274	0.602189	0.608151	0.215988	0	0	1.13076	0.573505	NOTCH1
Regulation of DNA-templated Transcription (GO:0006355)	1939-01-01	0.794871	0.798787	0.097569	0	0	0.642153	0.147422	NOTCH1
Regulation of Transcription by RNA Polymerase II (GO:0006357)	1950-01-01	0.812021	0.812021	0.0904326	0	0	0.606663	0.126325	NOTCH1

## Sheet: GO_MF
Term	Overlap	P-value	Adjusted P-value	#NAME?	Old P-value	Old Adjusted P-value	Odds Ratio	Combined Score	Genes
Oxysterol Binding (GO:0008142)	2025-01-14	0.00975859	0.117103	0.931432	0	0	118.183	547.143	GAS1
Receptor Tyrosine Kinase Binding (GO:0030971)	1963-01-01	0.0432219	0.126305	0.898579	0	0	24.7196	77.6544	FLT3LG
Sterol Binding (GO:0032934)	1967-01-01	0.0459067	0.126305	0.898579	0	0	23.2168	71.5343	GAS1
Protein Tyrosine Kinase Binding (GO:1990782)	1982-01-01	0.0559125	0.126305	0.898579	0	0	18.9031	54.516	FLT3LG
Cytokine Receptor Activity (GO:0004896)	1983-01-01	0.0565761	0.126305	0.898579	0	0	18.6717	53.6282	IL1RL2
Growth Factor Receptor Binding (GO:0070851)	1/100	0.0677909	0.126305	0.898579	0	0	15.4522	41.587	IL3
Cytokine Receptor Binding (GO:0005126)	1/109	0.0736779	0.126305	0.898579	0	0	14.1581	36.9251	IL3
Cytokine Activity (GO:0005125)	1/186	0.122652	0.183978	0.735234	0	0	8.23326	17.2767	IL3
DNA-binding Transcription Activator Activity, RNA Polymerase II-specific (GO:0001228)	1/318	0.201054	0.268072	0.571749	0	0	4.77287	7.65656	NOTCH1
Receptor Ligand Activity (GO:0048018)	1/380	0.235587	0.282704	0.548667	0	0	3.9795	5.75306	IL3
Transcription Cis-Regulatory Region Binding (GO:0000976)	1/548	0.32232	0.351622	0.453924	0	0	2.73365	3.09507	NOTCH1
Cis-Regulatory Region Sequence-Specific DNA Binding (GO:0000987)	1/1035	0.52487	0.52487	0.279948	0	0	1.40991	0.908835	NOTCH1

## Sheet: GO_CC
Term	Overlap	P-value	Adjusted P-value	#NAME?	Old P-value	Old Adjusted P-value	Odds Ratio	Combined Score	Genes
Adherens Junction (GO:0005912)	1/151	0.100697	0.5154	0.287855	0	0	10.1723	23.3519	NOTCH1
Cell-Cell Junction (GO:0005911)	1/316	0.199916	0.5154	0.287855	0	0	4.80366	7.73321	NOTCH1
Endosome Membrane (GO:0010008)	1/392	0.242109	0.5154	0.287855	0	0	3.85501	5.46782	NOTCH1
Cytoplasmic Vesicle Membrane (GO:0030659)	1/415	0.254464	0.5154	0.287855	0	0	3.63657	4.97699	NOTCH1
Golgi Membrane (GO:0000139)	1/476	0.286333	0.5154	0.287855	0	0	3.15968	3.95149	NOTCH1
Endoplasmic Reticulum Membrane (GO:0005789)	1/872	0.464371	0.601572	0.220712	0	0	1.68816	1.29494	NOTCH1
Bounding Membrane of Organelle (GO:0098588)	1/881	0.467889	0.601572	0.220712	0	0	1.6701	1.26848	NOTCH1
Nucleus (GO:0005634)	1979-01-01	0.980088	0.989925	0.0043976	0	0	0.238244	0.0047917	NOTCH1
Intracellular Membrane-Bounded Organelle (GO:0043231)	1997-01-01	0.989925	0.989925	0.0043976	0	0	0.197806	0.00200295	NOTCH1
